# Supplementary material
Source: PubMed Central journal article supplement (PMC3851312)
Supplement: NIHMS531001-supplement-1_si_001.pdf [file NIHMS531001-supplement-1_si_001.pdf]

## Supporting Information

# Detailed Glycan Structural Characterization by Electronic Excitation Dissociation\*

Xiang Yu,<sup>1,2</sup> Yan Jiang,<sup>1,2</sup> Yajie Chen,<sup>3</sup> Yiqun Huang,<sup>1,2</sup> Catherine E. Costello,<sup>1,2</sup> and Cheng Lin<sup>1,2\*</sup>

<sup>1</sup>Center for Biomedical Mass Spectrometry, <sup>2</sup>Department of Biochemistry,

Boston University School of Medicine, Boston, MA 02118, USA

<sup>3</sup>College of Science, Northeastern University, 360 Huntington Ave., Boston, MA 02115, USA

\* Corresponding Author. Email: [chenglin@bu.edu](mailto:chenglin@bu.edu)

## Supporting Information

### Table of Contents

|            |      |           |      |
|------------|------|-----------|------|
| Methods    | S-3  | Table S3  | S-23 |
| Scheme S1  | S-8  | Table S4  | S-24 |
| Scheme S2  | S-8  | Table S5  | S-26 |
| Figure S1  | S-9  | Table S6  | S-27 |
| Figure S2  | S-10 | Table S7  | S-30 |
| Figure S3  | S-11 | Table S8  | S-32 |
| Figure S4  | S-11 | Table S9  | S-34 |
| Figure S5  | S-12 | Table S10 | S-36 |
| Figure S6  | S-13 | Table S11 | S-38 |
| Figure S7  | S-14 | Table S12 | S-40 |
| Figure S8  | S-15 | Table S13 | S-42 |
| Figure S9  | S-16 | Table S14 | S-44 |
| Figure S10 | S-17 | Table S15 | S-46 |
| Figure S11 | S-18 | Table S16 | S-48 |
| Figure S12 | S-19 | Table S17 | S-50 |
| Figure S13 | S-20 | Table S18 | S-52 |
| Figure S14 | S-21 | Table S19 | S-57 |
| Table S1   | S-22 | Table S20 | S-59 |
| Table S2   | S-22 |           |      |

## **Methods**

### **Materials**

Sialyl lewis A (SLe<sup>A</sup>), sialyl lewis X (SLe<sup>X</sup>), lacto-*N*-tetraose (LNT), and lacto-*N*-neotetraose (LNnT) were purchased from Dextra Laboratories (Reading, UK). Maltoheptaose, dextran ladder, ribonuclease B (RNase B), H<sub>2</sub><sup>18</sup>O (97%) water, 2-aminopyridine, acetic acid, and reagents for permethylation including dimethyl sulfoxide (DMSO), sodium hydroxide (NaOH), methyl iodide (CH<sub>3</sub>I), and chloroform, as well as all salts including lithium acetate, sodium acetate, sodium borohydride (NaBH<sub>4</sub>), potassium acetate, cesium acetate were obtained from Sigma-Aldrich (St. Louis, MO). Glycerol-free PNGase F was obtained from Prozyme (Hayward, CA). Sep-Pak<sup>TM</sup> C18 SPE cartridges were obtained from Waters (Milford, MA). Porous-graphitized carbon (PGC) solid phase extraction (SPE) columns were obtained from Thermo-Scientific (Springfield, NJ). Reversed-phase C18 ZipTips were obtained from Millipore (Billerica, MA). Microspin cellulose cartridges were purchased from Harvard Apparatus (Holliston, MA).

### **Reducing End Reduction**

Reducing end reduction was performed on maltoheptaose according to the method reported by Costello *et al.*<sup>[1]</sup> Dried maltoheptaose (~100 µg) was dissolved in 200 µL of 0.1M NaOH / 1M NaBH<sub>4</sub> for 1 h at ambient temperature. Acetic acid (10%) was then added drop by drop until bubbling ceased. PGC SPE cartridges were used for desalting of the reduction product. PGC cartridges were pre-wetted with 100% acetonitrile followed by sequential rinses with 2 mL of 60%, 30%, and 0% acetonitrile/water, each containing 0.1% trifluoroacetic acid (TFA). The reduction product was loaded to a PGC cartridge, washed extensively with 0.1% TFA and eluted by 3 mL of 30% acetonitrile (ACN) in 0.1% TFA. The desalted and reduced maltoheptaose was then dried in a SpeedVac<sup>TM</sup> concentrator prior to permethylation.

### **Reducing End <sup>18</sup>O-Labeling**

The reducing end <sup>18</sup>O-isotope labeling was performed based on the method introduced by Viseux *et al.*<sup>[2]</sup> The catalyst solution was prepared by dissolving 2.7 mg of 2-aminopyridine in 1.0 mL of anhydrous methanol. Dried native glycan ( $\leq 50$   $\mu$ g) was dissolved in 25  $\mu$ L of H<sub>2</sub><sup>18</sup>O (97%) with 2.5  $\mu$ L of the catalyst solution and 1  $\mu$ L of acetic acid. The solution was then incubated at 37 °C overnight. After completion of the reaction, the <sup>18</sup>O-labeled glycans were dried in a SpeedVac™ concentrator prior to permethylation.

### **Reducing End 2-AB Labeling**

The reducing end 2-AB labeling was performed as described previously.<sup>[3]</sup> Briefly, the labeling reagent solution was prepared by dissolving 6 mg of dried 2-aminobenzamide (2-AB) and 6 mg of dried sodium cyanoborohydride (NaBH<sub>3</sub>CN) in 100  $\mu$ L of acetic acid:DMSO (3:7, *v:v*) solution. The oligosaccharide (10  $\mu$ g) was dissolved in 10  $\mu$ L of the reagent solution and was incubated at 65 °C for 3 h. Excess reagents were then removed with microspin cellulose cartridges (Harvard Apparatus, Holliston, MA).

### **N-linked Glycan Release from Ribonuclease B**

The high-mannose *N*-linked glycans were released from RNase B by PNGase F according to the Glyko® *N*-Glycanase protocol by Prozyme. Dried glycoprotein (500  $\mu$ g) was dissolved in 45  $\mu$ L of 1X Tris reaction buffer and 2.5  $\mu$ L of denaturation solution. The glycoprotein was then denatured in boiling water for 5 min. After denaturation, 2.5  $\mu$ L of detergent solution and 2  $\mu$ L of PNGase F were added. The mixture of glycoprotein and PNGase F was incubated at 37 °C overnight. Sep-Pak™ C18 SPE cartridges were used to separate the released *N*-linked glycans from the protein. The C18 SPE cartridge was sequentially rinsed with 10 mL of 100% ACN, 50% ACN, and water. The mixture containing high mannose *N*-linked glycan, deglycosylated ribonuclease B and PNGase F was then loaded to the cartridge. The *N*-linked glycans were eluted from the cartridge with 3 x 2 mL water. The purified *N*-linked glycans were then dried in a SpeedVac™ concentrator.

### **Permethylation**

Permethylation was performed using the method introduced by Ciucanu and Kerek<sup>[4]</sup> and modified by Ciucanu and Costello.<sup>[5]</sup> The native glycan was suspended in 100  $\mu\text{L}$  of DMSO/NaOH solution and was left at room temperature for 1 h, with vortexing every 15 min.  $\text{CH}_3\text{I}$  (50  $\mu\text{L}$ ) was then added to the reaction mixture and the reaction was allowed to proceed for another 1 h, with vortexing every 15 min. Additional NaOH/DMSO (100  $\mu\text{L}$ ) and  $\text{CH}_3\text{I}$  (50  $\mu\text{L}$ ) were then added together, and the reaction was allowed to proceed for at least 1 h longer, with vortexing every 15 min. After the completion of the reaction, 300  $\mu\text{L}$  of chloroform was added to stop the permethylation reaction and to extract the permethylated glycans. Water (400  $\mu\text{L}$ ) was added to wash out the salts in the sample. The sample tubes were vortexed and centrifuged. The upper aqueous layer was removed and the organic phase was retained. The washing cycle was repeated at least 5 times.

### **Electrospray Conditions**

Permethylated oligosaccharides were dissolved in 25% methanol, 20-250  $\mu\text{M}$  salt solutions to a concentration of 5  $\mu\text{M}$  for electrospray ionization (ESI) tandem MS analysis. Samples were loaded into a glass capillary tip pulled with a micropipette puller (model P-97; Sutter Instruments Co., Novato, CA) to  $\sim 1$   $\mu\text{m}$  orifice diameter. A bare nickel chromium wire was inserted into the sample solution on the distal end of the tip to form the electrical connection. Samples were then directly infused into the mass spectrometer ion source.

### **Tandem Mass Spectrometry**

The tandem mass spectrometry (MS/MS) experiments were performed on a 12-T solariX<sup>TM</sup> hybrid Qq-FTICR mass spectrometer equipped with an indirectly heated hollow dispenser cathode (Bruker Daltonics, Bremen, Germany). Target ions were isolated by a front-end quadrupole and accumulated in the collision cell for 100 to 500 ms before being transferred to the ICR cell. For low-energy ECD, the precursor ions were irradiated with  $\sim 1.5$  eV electrons for 100 ms; for EED, the precursor ions were irradiated with 14 eV

### **Supporting Information for EED of Glycans**

electrons, for 0.2 to 0.5 s. The cathode heating current was from 1.32 A to 1.52 A. A 0.5 s transient was typically acquired. Each ExD spectrum shown is the result of multiple transients summed to improve the signal-to-noise ratio.

### **On-line LC-MS/MS Analysis**

On-line reversed phase liquid chromatographic separation was carried out on a nanoACQUITY UPLC system (Waters, Milford, MA). Ten ng of reduced and permethylated maltodextrin was loaded onto a self-packed capillary trapping column (150  $\mu\text{m}$  x 30 mm, C18, 5  $\mu\text{m}$  particle size, 200  $\text{\AA}$ ) and separated by an analytical column (150  $\mu\text{m}$  x 100 mm, C18, 3  $\mu\text{m}$  particle size, 100  $\text{\AA}$ ) at 35  $^{\circ}\text{C}$ . The solvent system consisted of 0.1% formic acid in 1% acetonitrile (solvent A) and 0.1% formic acid in 99% acetonitrile (solvent B). The gradient program included a 4-min trapping at a flow rate of 4  $\mu\text{L}/\text{min}$  in 80% solvent A and 20% solvent B, followed by separation at a flow rate of 500 nL/min, using a 20-80% linear gradient of solvent B over 40 min. At the end of the separation, the gradient was ramped to 99% of solvent B over 2 min and stayed for 3 min, before returning to 20% of solvent B in 2 min, followed by equilibration to the original condition for 12 min.

LC-eluent was infused into the solarix mass spectrometer using a nanoESI source. The instrument was externally calibrated using sodium trifluoroacetate ion clusters over the range  $m/z$  200 - 3000 with 1 M data points, giving a transient length of 0.58 s and an FT-limited mass resolving power of 130,000 at  $m/z$  400. For LC-MS/MS experiments, data-dependent acquisition was performed with the system switching between the MS and MS/MS modes. 0.2-s ion accumulation was used for each MS scan, and 2.5-s ion accumulation was used for each MS/MS scan. Preferred and exclusion lists were used to select ions of interest for tandem MS analysis. The precursor ions were isolated in the quadrupole with an isolation window of 6  $m/z$ . For EED experiments, the electron irradiation time was 0.5 s, with the cathode heating currents set at 1.52 A, the cathode bias potential at -15 V, and the extraction lens voltage set at -15.05 V.

## **Data Analysis**

All spectra were zero-filled twice and Fourier transformed without apodization. The MS/MS spectra were internally calibrated using a few fragment ions assigned with high confidence, giving a typical mass measurement accuracy of 2 ppm or better. Deconvoluted mass lists were generated semi-automatically by the SNAP™ (Sophisticated Numerical Annotation Procedure) algorithm<sup>[6]</sup> using the DataAnalysis™ software (Bruker Daltonics) and verified manually. Software used to assist in data analysis include GlycoWorkBench,<sup>[7]</sup> and a home-made Visual Basic program for auto-assignment. The nomenclature used for designating carbohydrate fragments was that introduced by Domon and Costello.<sup>[8]</sup>

## **References**

- [1] C. E. Costello, J. M. Contado-Miller, J. F. Cipollo, *J. Am. Soc. Mass Spectrom.* **2007**, *18*, 1799-1812.
- [2] N. Viseux, E. deHoffmann, B. Domon, *Anal. Chem.* **1997**, *69*, 3193-3198.
- [3] A. M. Hitchcock, M. J. Bowman, G. O. Staples, J. Zaia, *Electrophoresis* **2008**, *29*, 4538-4548.
- [4] I. Ciucanu, F. Kerek, *Carbohydr Res.* **1984**, *131*, 209-217.
- [5] I. Ciucanu, C. E. Costello, *J. Am. Chem. Soc.* **2003**, *125*, 16213-16219.
- [6] C. Koster, A. Holle, in *ASMS annual conference*, Dallas, TX, **1999**.
- [7] a) A. Ceroni, A. Dell, S. M. Haslam, *Source Code for Biology and Medicine* **2007**, *2*, 3; b) A. Ceroni, K. Maass, H. Geyer, R. Geyer, A. Dell, S. M. Haslam, *J. Proteome. Res.* **2008**, *7*, 1650-1659.
- [8] B. Domon, C. E. Costello, *Glycoconjugate J.* **1988**, *5*, 397-409.

Supplemental Schemes

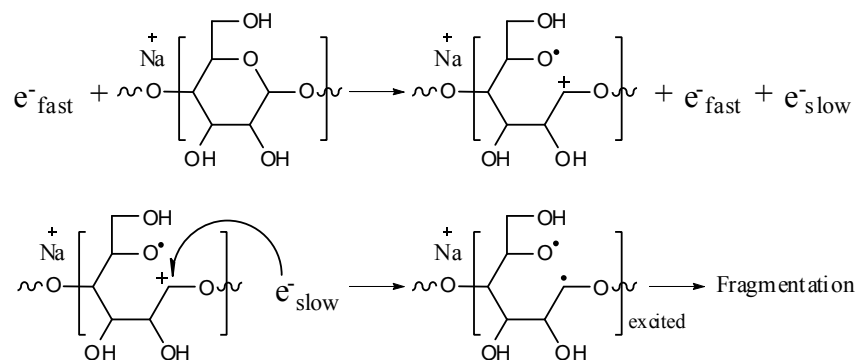

**Scheme S1.** EED is initiated by electron detachment from an oxygen atom, forming a distonic ion (top). The subsequent electron re-capture produces a di-radical which then undergoes extensive fragmentation (bottom).

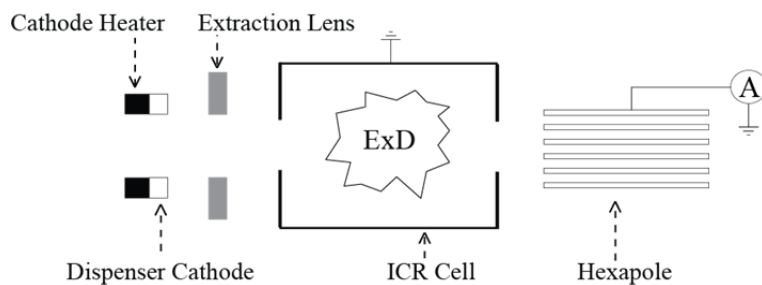

**Scheme S2.** Schematics of the ExD experimental setup.



## Supplemental Figures

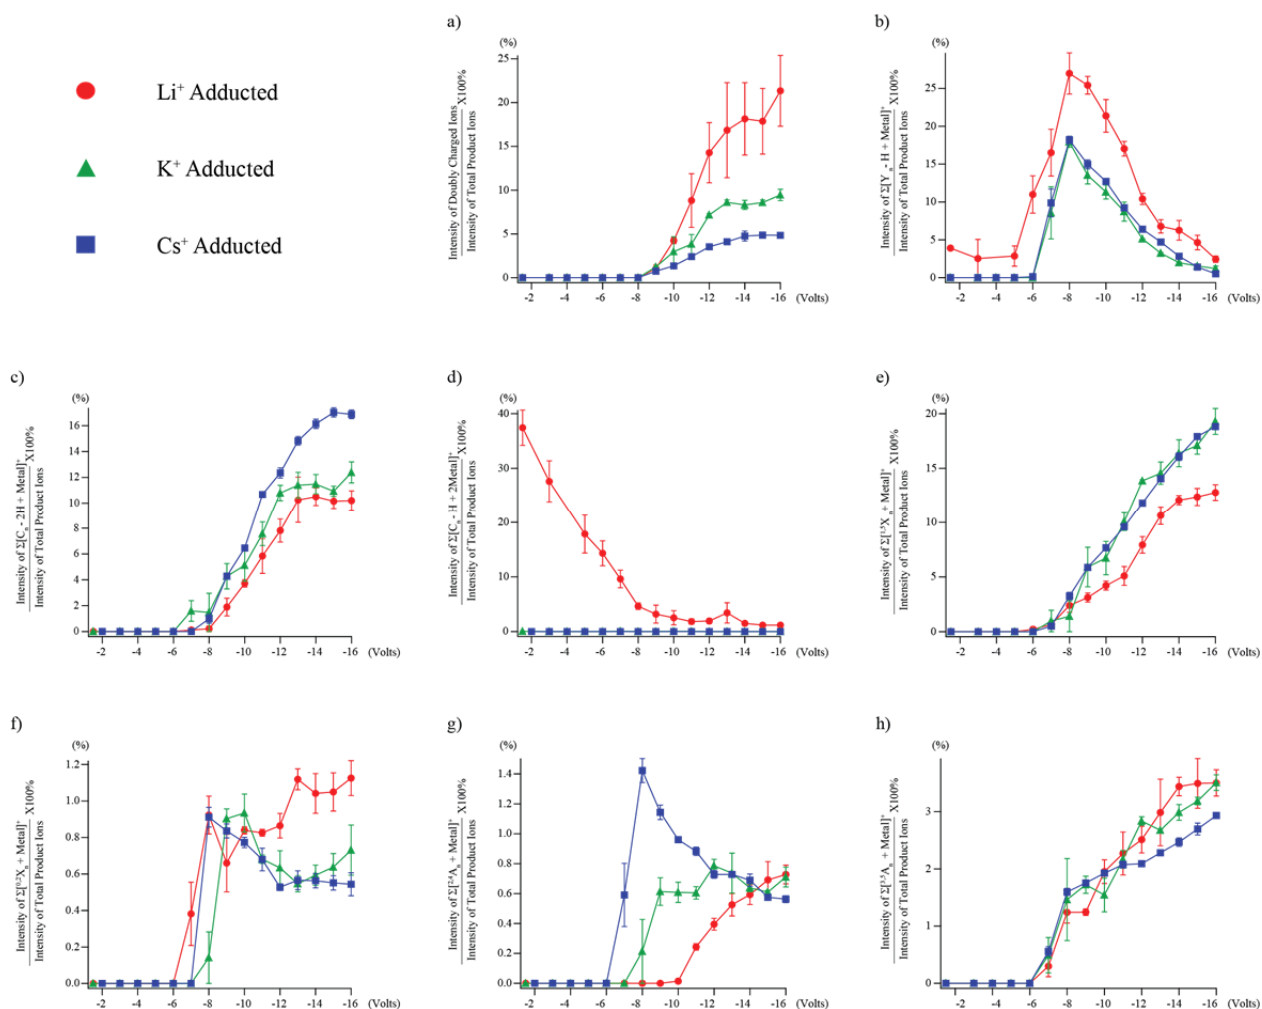

**Figure S1.** The ExD fragmentation pattern of metal-adducted glycans is affected by both the electron energy and the charge carrier. Reduced and permethylated maltoheptaose was selected as the model glycan. With 1.32 A cathode heating current, precursor ions adducted with either two  $\text{Li}^+$  (red circle,  $m/z$  752.4013), two  $\text{K}^+$  (green triangle,  $m/z$  784.3490), or two  $\text{Cs}^+$  (blue square,  $m/z$  878.2907) were isolated and irradiated with electrons at different energies, ramping from 1 eV to 16 eV at 1-eV intervals. The x axis represents the voltage applied to the cathode dispenser. The y axis represents the percentage ratio of the intensity of a specific type of fragment ion and the total product ion intensity. Fragment ions plotted are a) doubly charged ions, b)  $[\text{Y} - \text{H} + 2\text{Metal}]^+$  ions, c)  $[\text{C} - 2\text{H} + \text{Metal}]^+$  ions, d)  $[\text{C} - \text{H} + 2\text{Metal}]^+$  ions, e)  $[\text{}^{1,5}\text{X} + \text{Metal}]^+$  ions, f)  $[\text{}^{0,2}\text{X} + \text{Metal}]^+$  ions, g)  $[\text{}^{2,4}\text{A} + \text{Metal}]^+$  ions, and h)  $[\text{}^{3,5}\text{A} + \text{Metal}]^+$  ions, respectively. The relative abundance of linkage definitive cross-ring fragments increased significantly as the electron energy approached the EED region.

## Supporting Information for EED of Glycans

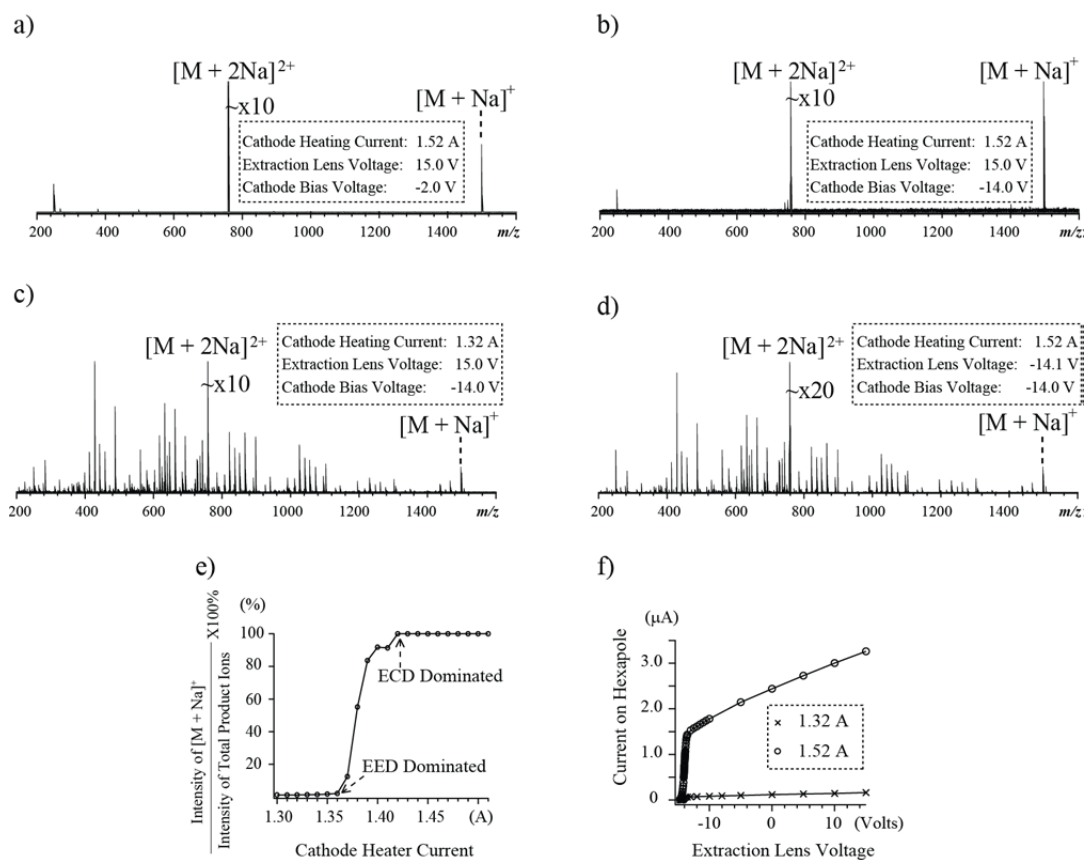

**Figure S2.** Influence of the cathode heating current and the extraction lens voltage on the fragmentation pattern of the doubly sodiated permethylated maltoheptaose ( $[M + 2Na]^{2+}$ ,  $m/z$  760.3594). a) With a cathode heating current of 1.52 A, an ECD experiment can be carried out by setting the cathode bias to -2.0 V and the extraction lens voltage to 15.0 V. b) The ECD process still dominated even when the kinetic energy of electrons was elevated to 14.0 eV by decreasing the cathode bias from -2 V to -14 V. Efficient EED can be obtained either c) by lowering the cathode heating current to 1.32 A or d) by setting the extraction lens voltage (-14.1 V) close to the cathode bias (-14.0 V). e) The ECD efficiency dropped exponentially with the decreasing cathode heating current. The ratio of the abundance of the charge reduced species,  $[M + Na]^+$ , to the total product ion abundance was used as an indicator for the ECD efficiency. f) With the cathode bias set to -14.0 V, the electron current measured at the hexapole decreased as the extraction lens voltage decreased.

Supporting Information for EED of Glycans

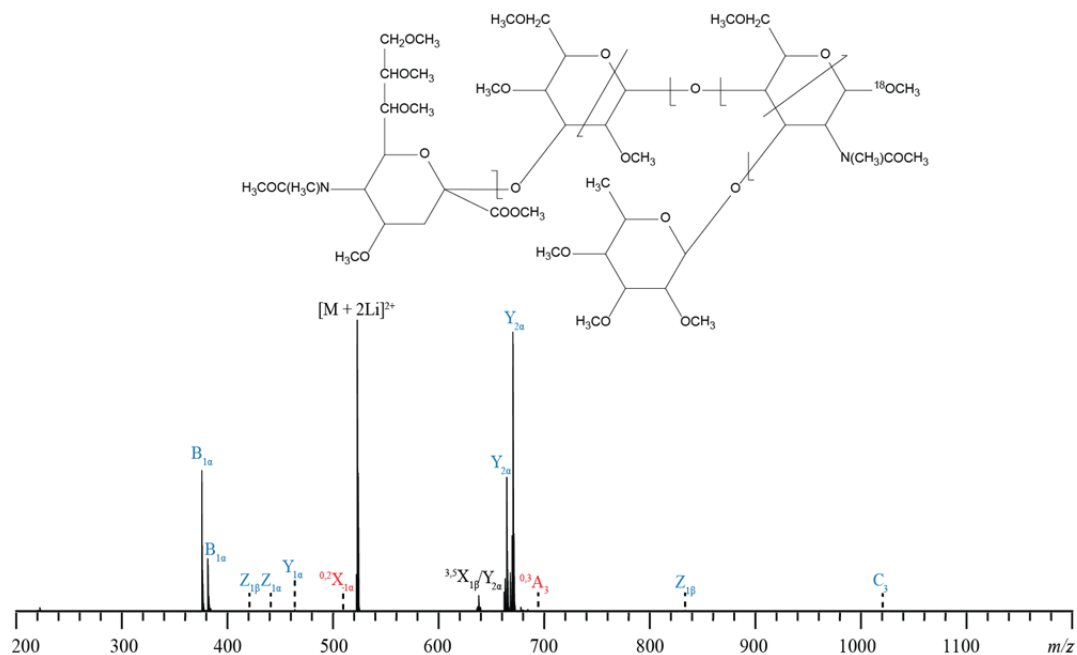

**Figure S3.** The CID cleavage map and the CID spectrum of the doubly lithiated, permethylated and  $^{18}\text{O}$ -labeled  $\text{SLe}^{\text{X}}$  precursor ion at  $m/z$  523.2830. The detailed product ion list can be found in Table S2.

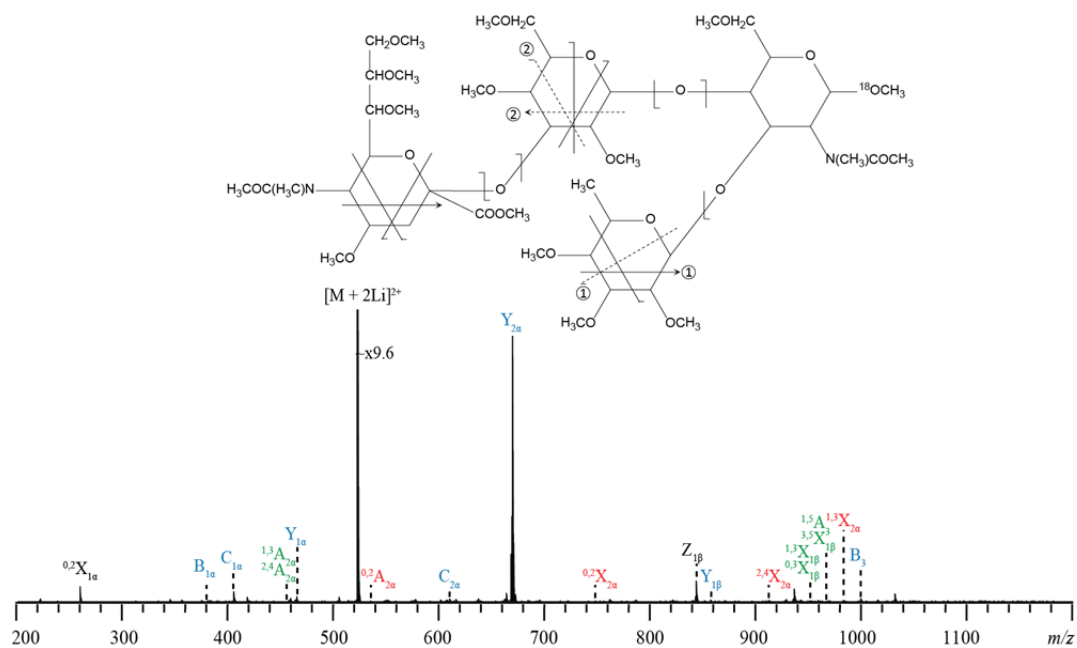

**Figure S4.** The ECD cleavage map and the ECD spectrum of the doubly lithiated, permethylated and  $^{18}\text{O}$ -labeled  $\text{SLe}^{\text{X}}$  precursor ion at  $m/z$  523.2830. The detailed product ion list can be found in Table S3.

Supporting Information for EED of Glycans

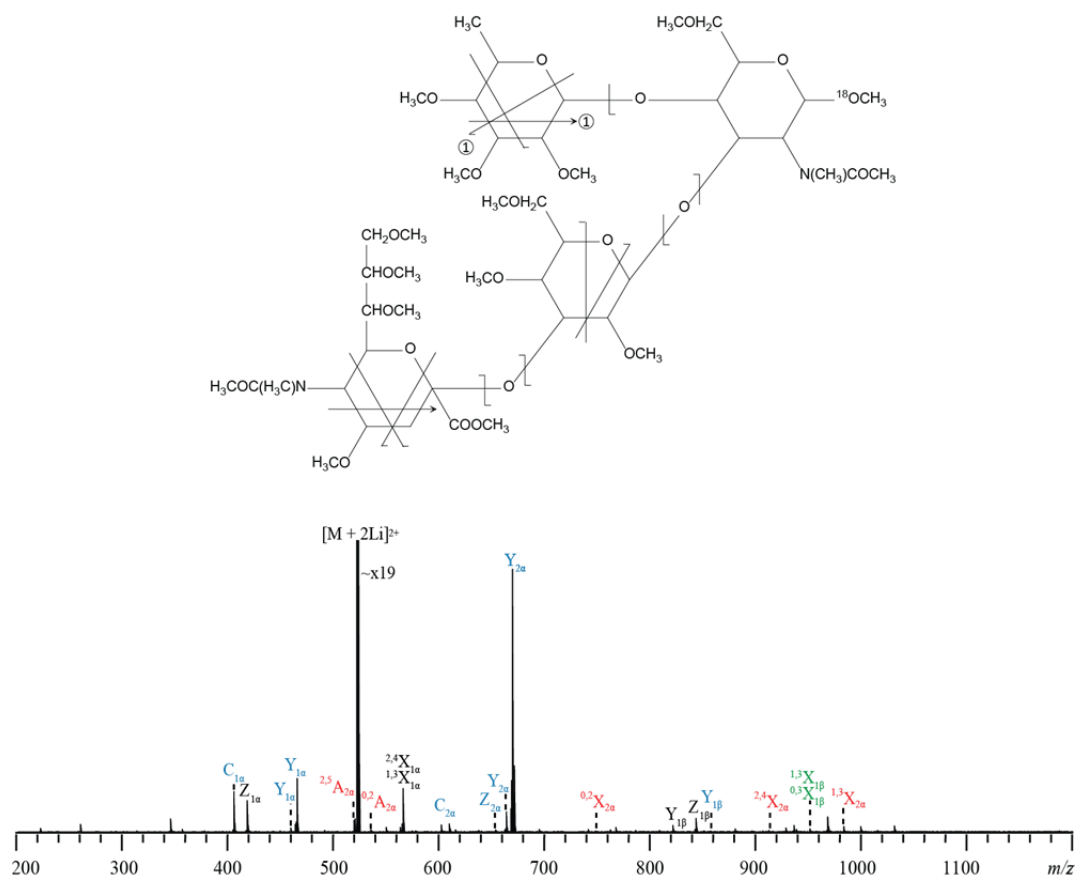

**Figure S5.** The ECD cleavage map and the ECD spectrum of the doubly lithiated, permethylated and  $^{18}\text{O}$ -labeled  $\text{SLe}^{\text{A}}$  precursor ion at  $m/z$  523.2830. The detailed product ion list can be found in Table S5.

Supporting Information for EED of Glycans

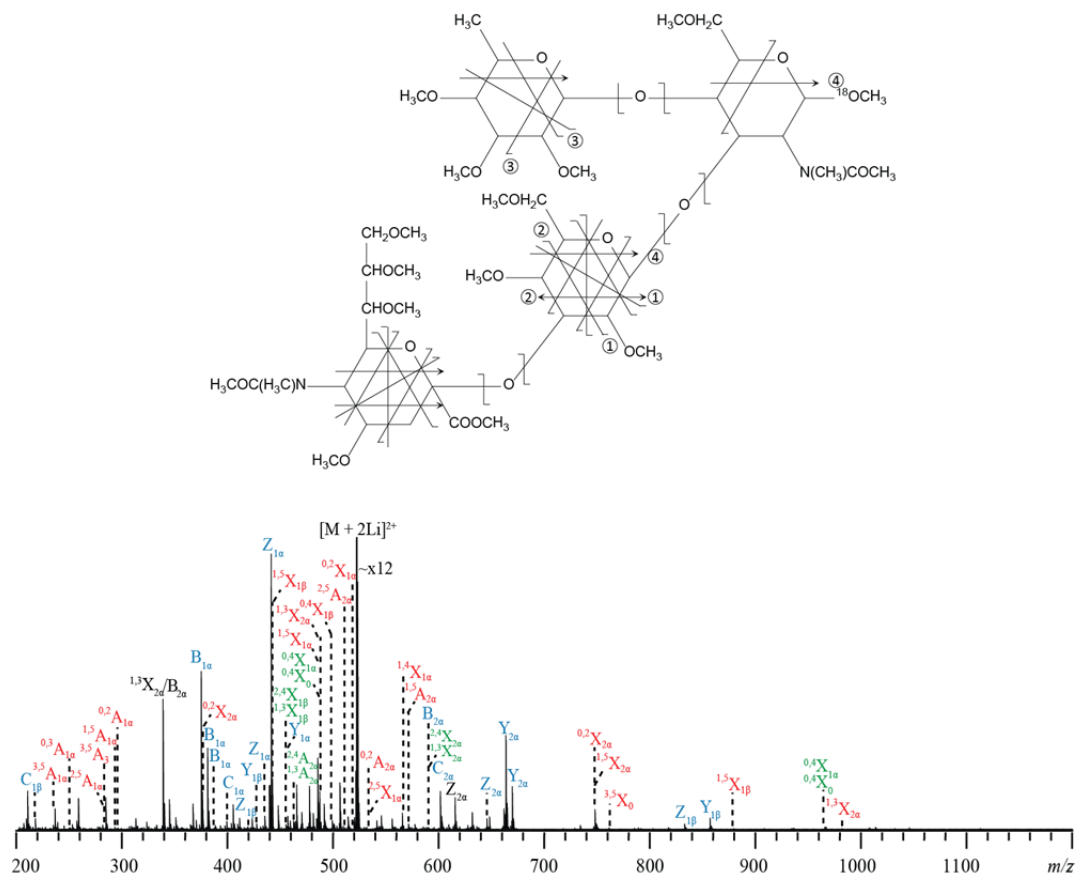

**Figure S6.** The EED cleavage map and the EED spectrum of the doubly lithiated, permethylated and  $^{18}\text{O}$ -labeled  $\text{SLe}^{\text{A}}$  precursor ion at  $m/z$  523.2830. The detailed product ion list can be found in Table S6.

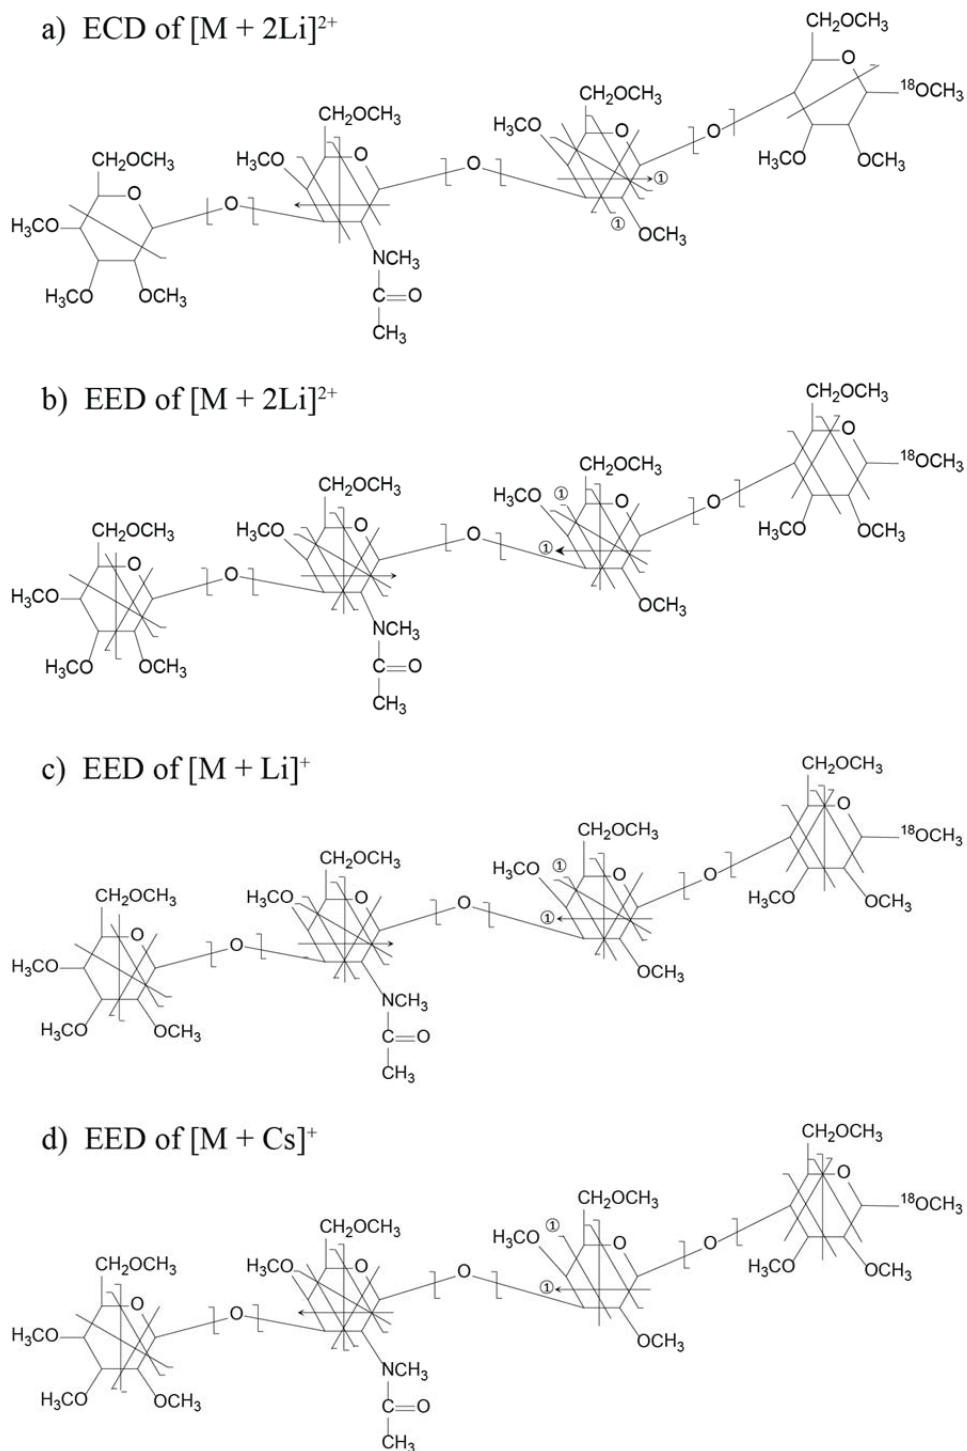

**Figure S7.** a) The ECD and b) EED cleavage maps of the doubly lithiated, permethylated, <sup>18</sup>O-labeled LNT at  $m/z$  459.7513; c) the EED cleavage map of the singly lithiated, permethylated, <sup>18</sup>O-labeled LNT at  $m/z$  912.4872; d) the EED cleavage map of the singly cesiated, permethylated, <sup>18</sup>O-labeled LNT at  $m/z$  1038.3767. The detailed product ion lists can be found in Tables S7 to S10.

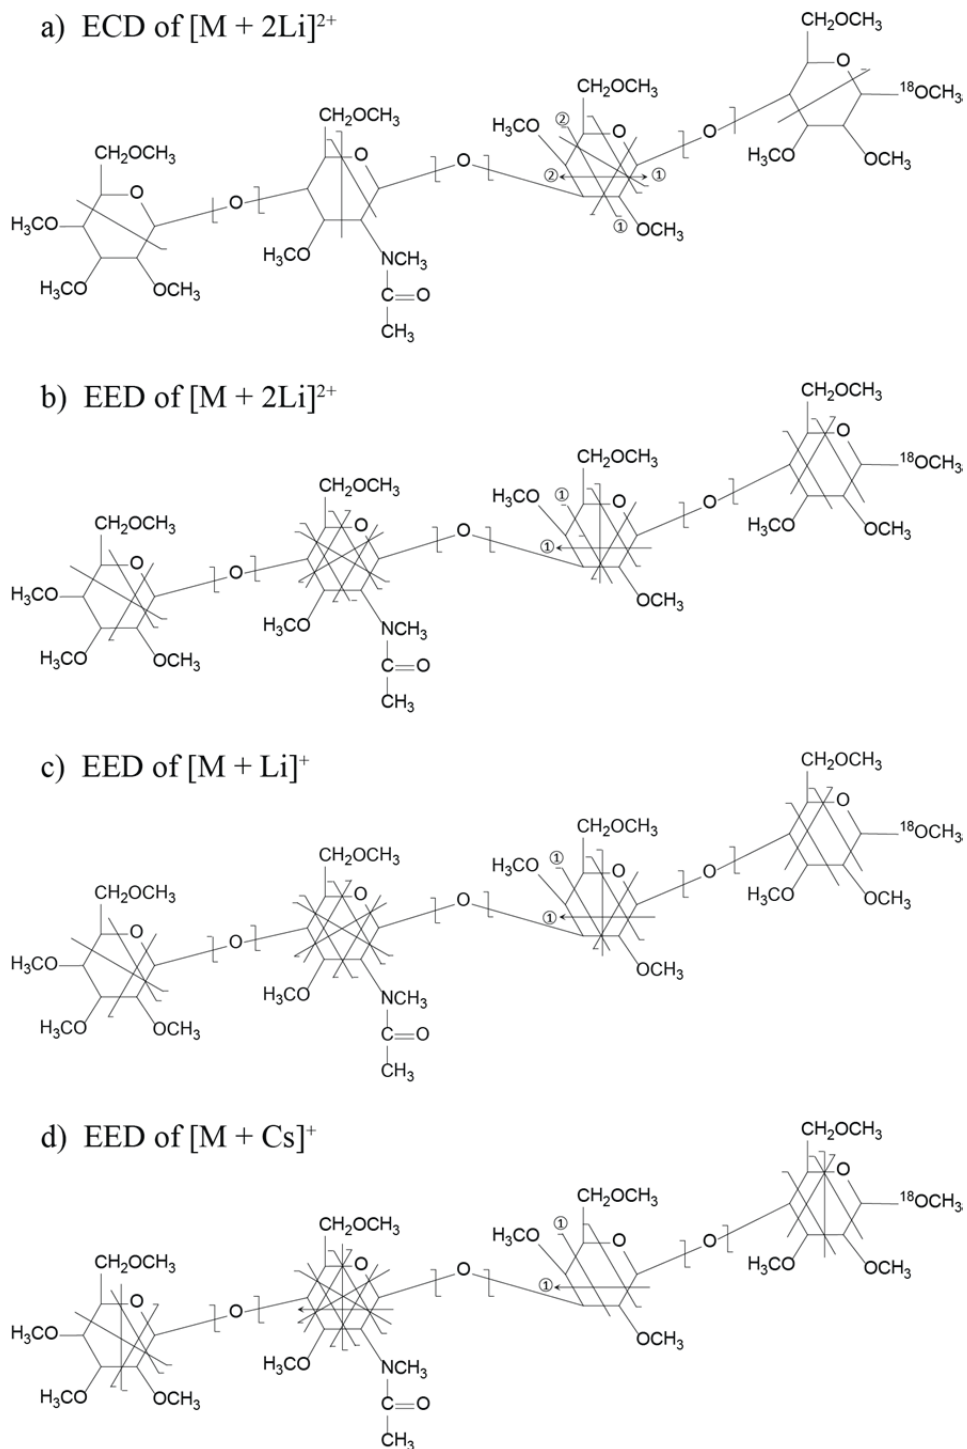

**Figure S8.** a) The ECD and b) EED cleavage maps of the doubly lithiated, permethylated,  $^{18}O$ -labeled LNnT at  $m/z$  459.7513; c) the EED cleavage map of the singly lithiated, permethylated,  $^{18}O$ -labeled LNnT at  $m/z$  912.4872; d) the EED cleavage map of singly cesiated, permethylated,  $^{18}O$ -labeled LNnT at  $m/z$  1038.3767. The detailed product ion list can be found in Table S11 to S14.

Supporting Information for EED of Glycans

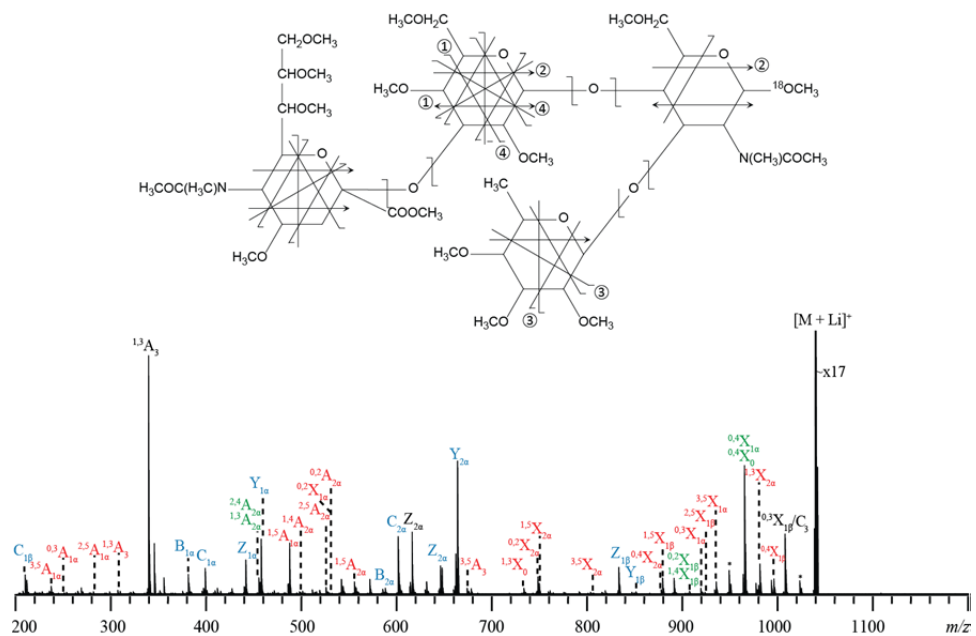

**Figure S9.** The EED cleavage map and spectrum of the singly lithiated, permethylated and  $^{18}\text{O}$ -labeled  $\text{SLe}^{\text{X}}$  precursor ion at  $m/z$  1039.5505. The detailed product ion list can be found in Table S15.



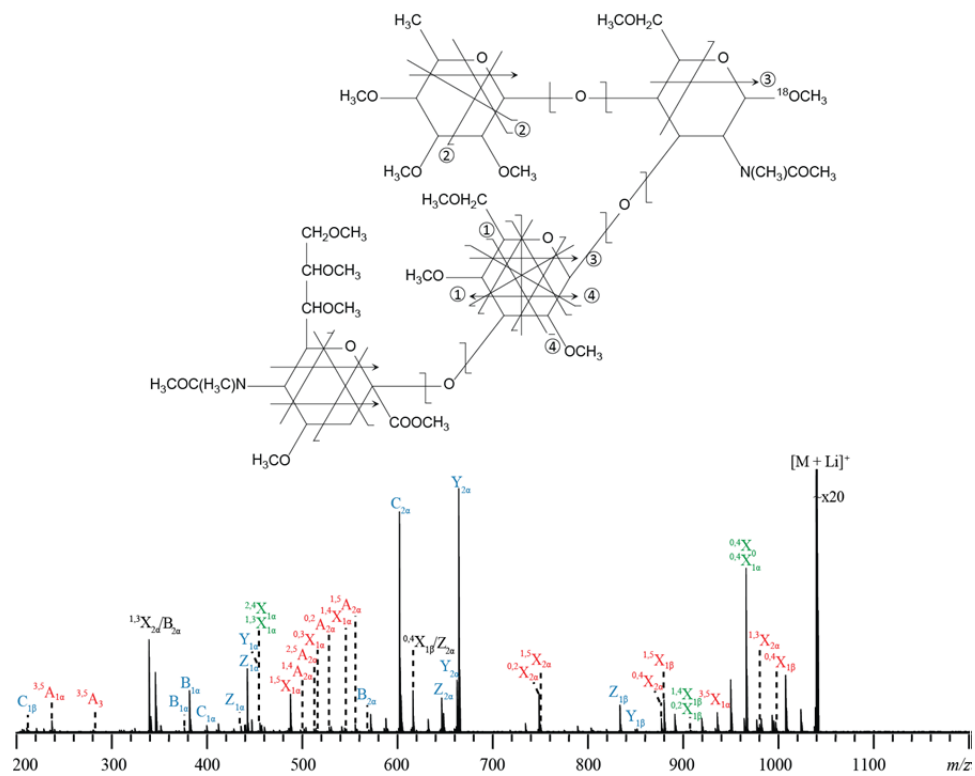

**Figure S10.** The EED cleavage map and spectrum of the singly lithiated, permethylated and  $^{18}\text{O}$ -labeled  $\text{SLe}^{\text{A}}$  precursor ion at  $m/z$  1039.5505. The detailed product ion list can be found in Table S16.

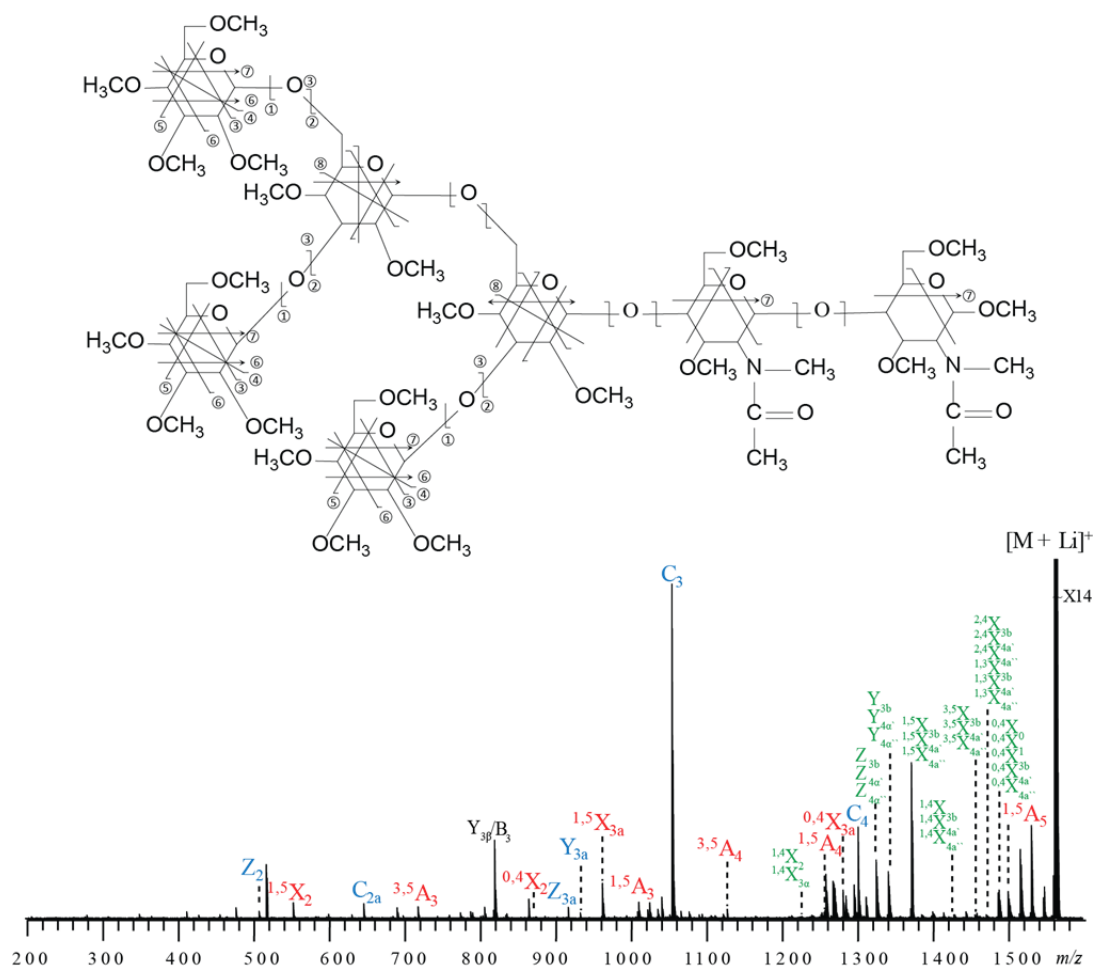

**Figure S11.** The EED cleavage map and spectrum of the singly lithiated and permethylated  $(\text{Man})_5(\text{GlcNAc})_2$  at  $m/z$  1563.8808. The detailed product ion list can be found in Table S17.

Supporting Information for EED of Glycans

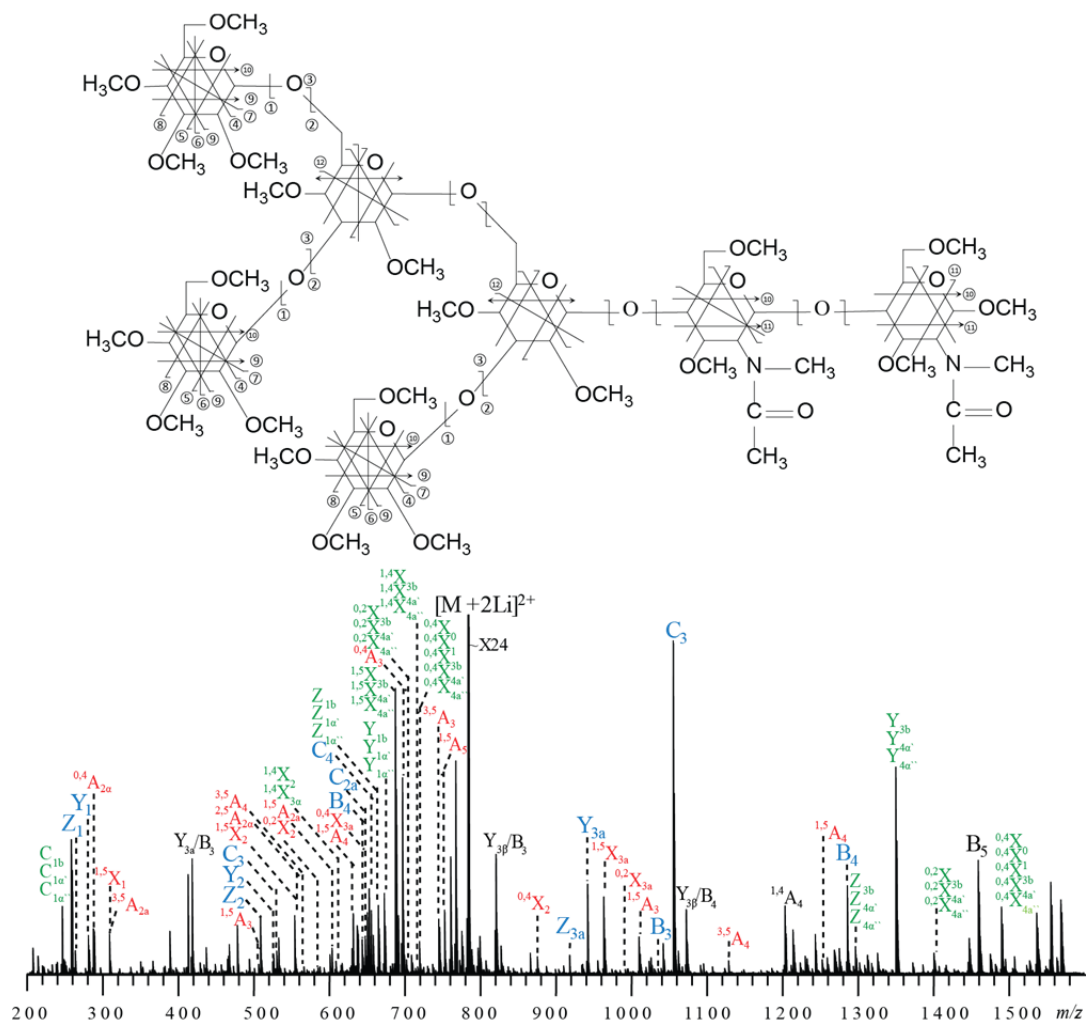

**Figure S12.** The EED cleavage map and spectrum of the doubly lithiated and permethylated  $(\text{Man})_5(\text{GlcNAc})_2$  at  $m/z$  785.4121. The detailed product ion list can be found in Table S18.

Supporting Information for EED of Glycans

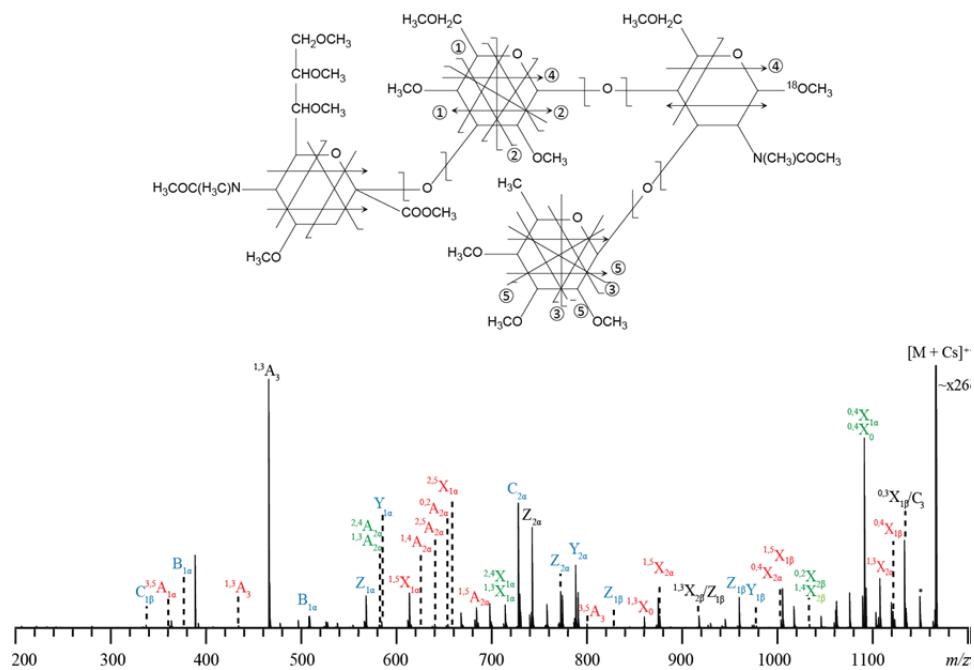

**Figure S13.** The EED cleavage map and spectrum of the singly cesiated, permethylated,  $^{18}\text{O}$ -labeled  $\text{SLe}^{\text{X}}$  at  $m/z$  1165.4400. The detailed product ion list can be found in Table S19.

Supporting Information for EED of Glycans

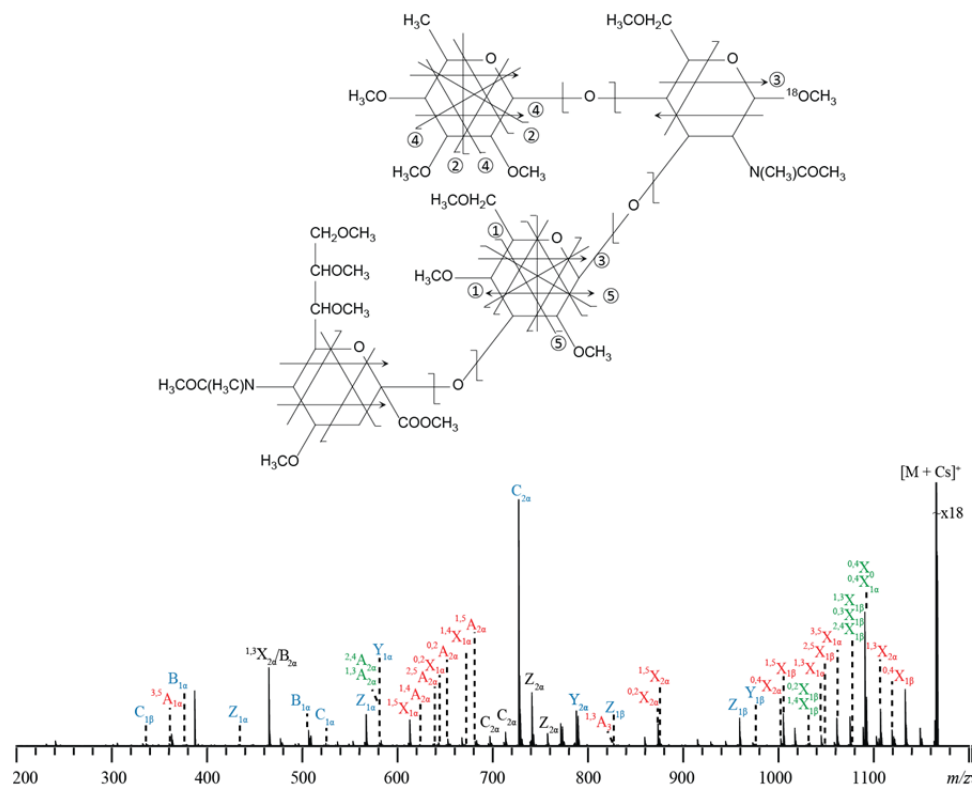

**Figure S14.** The EED cleavage map and spectrum of the singly cesiated, permethylated,  $^{18}\text{O}$ -labeled  $\text{SLe}^{\text{A}}$  at  $m/z$  1165.4400. The detailed product ion list can be found in Table S20.

## Supplemental Tables

**Table S1.** The electron current measured at the hexapole at two different cathode bias voltage settings.

The extraction lens voltage was 15.0 V, and the cathode heating current was 1.52 A.

|                                                |       |      |
|------------------------------------------------|-------|------|
| Cathode bias voltage (V)                       | -2    | -14  |
| Electron current measured at the hexapole (nA) | 0.349 | 3260 |

**Table S2.** List of CID fragment ions of the doubly lithiated, permethylated, and <sup>18</sup>O-Labeled Sialyl Lewis

X at  $m/z$  523.2830.

| Exp. $m/z$<br>(Da/e) | Relative<br>Intensity<br>(%) | charge<br>state (z) | Theo.<br>Mass | Error<br>(ppm) | Fragment<br>Types              | Loss or<br>Gain | number of<br>metal adducts |
|----------------------|------------------------------|---------------------|---------------|----------------|--------------------------------|-----------------|----------------------------|
| 376.1967             | 51.83                        | 1                   | 376.1966      | 0.21           | B <sub>1α</sub>                | H               | 0                          |
| 382.2048             | 19.42                        | 1                   | 382.2048      | 0.05           | B <sub>1α</sub>                |                 | +1Li                       |
| 420.2252             | 0.18                         | 2                   | 840.4511      | -0.90          | Z <sub>1β</sub>                |                 | +2Li                       |
| 442.2509             | 0.15                         | 1                   | 442.2509      | -0.03          | Z <sub>1α</sub>                |                 | +1Li                       |
| 458.2455             | 0.10                         | 1                   | 458.2458      | -0.64          | Y <sub>1α</sub>                | -2H             | +1Li                       |
| 466.2696             | 0.50                         | 1                   | 466.2696      | -0.09          | Y <sub>1α</sub>                | -H              | +2Li                       |
| 507.2573             | 0.04                         | 1                   | 507.2560      | 2.52           | <sup>0,2</sup> X <sub>1α</sub> | -2H             | 0                          |
| 514.2651             | 0.07                         | 2                   | 1028.5310     | -0.83          | C <sub>3</sub>                 | -2H             | +2Li                       |
| 664.3611             | 47.59                        | 1                   | 664.3612      | -0.20          | Y <sub>2α</sub>                |                 | +1Li                       |
| 670.3691             | 97.81                        | 1                   | 670.3694      | -0.47          | Y <sub>2α</sub>                | -H              | +2Li                       |
| 692.3670             | 0.08                         | 1                   | 692.3676      | -0.76          | <sup>0,3</sup> A <sub>3</sub>  | 2H              | +1Li                       |
| 827.4268             | 0.20                         | 1                   | 827.4269      | -0.16          | Z <sub>1β</sub>                | H               | 0                          |
| 833.4352             | 0.55                         | 1                   | 833.4351      | 0.06           | Z <sub>1β</sub>                |                 | +1Li                       |
| 1023.5322            | 0.39                         | 1                   | 1023.5306     | 1.54           | C <sub>3</sub>                 |                 | +1Li                       |

**Supporting Information for EED of Glycans**

**Table S3.** List of ECD fragment ions of the doubly lithiated, permethylated, and <sup>18</sup>O-Labeled Sialyl Lewis X at *m/z* 523.2830.

| Exp. <i>m/z</i><br>(Da/e) | Relative<br>Intensity<br>(%) | charge<br>state ( <i>z</i> ) | Theo.<br>Mass | Error<br>(ppm) | Fragment<br>Types              | Loss or<br>Gain | number of<br>metal adducts |
|---------------------------|------------------------------|------------------------------|---------------|----------------|--------------------------------|-----------------|----------------------------|
| 261.6424                  | 0.22                         | 2                            | 523.2873      | -4.83          | <sup>0,2</sup> X <sub>1α</sub> | CH <sub>2</sub> | 0                          |
| 376.1965                  | 0.05                         | 1                            | 376.1966      | -0.28          | B <sub>1α</sub>                | H               | 0                          |
| 382.2048                  | 0.05                         | 1                            | 382.2048      | 0.05           | B <sub>1α</sub>                |                 | +1Li                       |
| 384.2205                  | 0.04                         | 1                            | 384.2204      | 0.14           | B <sub>1α</sub>                | 2H              | +1Li                       |
| 390.2287                  | 0.02                         | 1                            | 390.2286      | 0.22           | B <sub>1α</sub>                | H               | +2Li                       |
| 406.2235                  | 0.44                         | 1                            | 406.2235      | -0.03          | C <sub>1α</sub>                | -H              | +2Li                       |
| 458.2573                  | 0.05                         | 1                            | 458.2572      | 0.19           | <sup>1,3</sup> A <sub>2α</sub> | 2H              | +1Li                       |
| 458.2573                  | 0.05                         | 1                            | 458.2572      | 0.19           | <sup>2,4</sup> A <sub>2α</sub> | 2H              | +1Li                       |
| 460.2614                  | 0.13                         | 1                            | 460.2614      | -0.09          | Y <sub>1α</sub>                |                 | +1Li                       |
| 466.2696                  | 0.22                         | 1                            | 466.2696      | -0.09          | Y <sub>1α</sub>                | -H              | +2Li                       |
| 536.2859                  | 0.01                         | 1                            | 536.2865      | -1.16          | <sup>0,2</sup> A <sub>2α</sub> | -H              | +2Li                       |
| 602.2993                  | 0.07                         | 1                            | 602.2995      | -0.28          | C <sub>2α</sub>                | -2H             | +1Li                       |
| 610.3232                  | 0.12                         | 1                            | 610.3233      | -0.22          | C <sub>2α</sub>                | -H              | +2Li                       |
| 662.3462                  | 0.07                         | 1                            | 662.3456      | 0.94           | Y <sub>2α</sub>                | -2H             | +1Li                       |
| 664.3612                  | 0.35                         | 1                            | 664.3612      | -0.02          | Y <sub>2α</sub>                |                 | +1Li                       |
| 670.3695                  | 11.17                        | 1                            | 670.3694      | 0.17           | Y <sub>2α</sub>                | -H              | +2Li                       |
| 748.3826                  | 0.02                         | 1                            | 748.3823      | 0.39           | <sup>0,2</sup> X <sub>2α</sub> |                 | +1Li                       |
| 843.4748                  | 0.86                         | 1                            | 843.4746      | 0.22           | Z <sub>1β</sub>                | 3H              | +2Li                       |
| 851.4424                  | 0.03                         | 1                            | 851.4457      | -3.88          | Y <sub>1β</sub>                |                 | +1Li                       |
| 857.4539                  | 0.06                         | 1                            | 857.4539      | 0.06           | Y <sub>1β</sub>                | -H              | +2Li                       |
| 912.4847                  | 0.04                         | 1                            | 912.4872      | -2.78          | <sup>2,4</sup> X <sub>2α</sub> | 2H              | +1Li                       |
| 951.4968                  | 0.03                         | 1                            | 951.4981      | -1.36          | <sup>0,3</sup> X <sub>1β</sub> |                 | +1Li                       |
| 951.4968                  | 0.03                         | 1                            | 951.4981      | -1.36          | <sup>1,3</sup> X <sub>1β</sub> |                 | +1Li                       |
| 951.4968                  | 0.03                         | 1                            | 951.4981      | -1.36          | <sup>2,4</sup> X <sub>1β</sub> |                 | +1Li                       |
| 969.5046                  | 0.03                         | 1                            | 969.5013      | 3.35           | <sup>1,5</sup> A <sub>3</sub>  | -H              | 0                          |
| 969.5046                  | 0.03                         | 1                            | 969.5087      | -4.26          | <sup>3,5</sup> X <sub>1β</sub> | 2H              | +1Li                       |
| 983.5224                  | 0.05                         | 1                            | 983.5244      | -1.96          | <sup>1,3</sup> X <sub>2α</sub> | 2H              | +1Li                       |
| 999.5164                  | 0.12                         | 1                            | 999.5119      | 4.51           | B <sub>3</sub>                 | H               | 0                          |

**Supporting Information for EED of Glycans**

**Table S4.** List of EED fragment ions of the doubly lithiated, permethylated, and <sup>18</sup>O-Labeled Sialyl Lewis X at *m/z* 523.2830.

| Exp. <i>m/z</i><br>(Da/e) | Relative<br>Intensity<br>(%) | charge<br>state (z) | Theo.<br>Mass | Error<br>(ppm) | Fragment<br>Types              | Loss or<br>Gain   | number of<br>metal adducts |
|---------------------------|------------------------------|---------------------|---------------|----------------|--------------------------------|-------------------|----------------------------|
| 211.1152                  | 1.20                         | 1                   | 211.1152      | -0.15          | C <sub>1β</sub>                | -2H               | +1Li                       |
| 213.1309                  | 1.05                         | 1                   | 213.1309      | 0.09           | C <sub>1β</sub>                |                   | +1Li                       |
| 219.1391                  | 0.65                         | 1                   | 219.1391      | 0.16           | C <sub>1β</sub>                | -H                | +2Li                       |
| 236.1468                  | 0.23                         | 1                   | 236.1469      | -0.27          | <sup>3,5</sup> A <sub>1α</sub> | -2H               | +1Li                       |
| 238.1625                  | 0.39                         | 1                   | 238.1625      | -0.05          | <sup>3,5</sup> A <sub>1α</sub> |                   | +1Li                       |
| 252.1418                  | 0.18                         | 1                   | 252.1418      | 0.11           | <sup>0,3</sup> A <sub>1α</sub> | -2H               | +1Li                       |
| 280.1731                  | 0.17                         | 1                   | 280.1731      | 0.05           | <sup>2,5</sup> A <sub>1α</sub> | -2H               | +1Li                       |
| 308.1679                  | 0.14                         | 1                   | 308.1680      | -0.25          | <sup>1,3</sup> A <sub>3</sub>  | -2H               | +1Li                       |
| 310.1838                  | 0.13                         | 1                   | 310.1836      | 0.55           | <sup>1,3</sup> A <sub>3</sub>  |                   | +1Li                       |
| 311.1915                  | 0.14                         | 1                   | 311.1915      | 0.12           | <sup>1,3</sup> A <sub>3</sub>  | H                 | +1Li                       |
| 316.1919                  | 0.08                         | 1                   | 316.1918      | 0.25           | <sup>1,3</sup> A <sub>3</sub>  | -H                | +2Li                       |
| 340.1942                  | 5.93                         | 1                   | 340.1942      | 0.03           | <sup>1,3</sup> A <sub>3</sub>  | +OCH <sub>2</sub> | +1Li                       |
| 376.1966                  | 5.31                         | 1                   | 376.1966      | -0.03          | B <sub>1α</sub>                | H                 | 0                          |
| 382.2048                  | 3.91                         | 1                   | 382.2048      | 0.05           | B <sub>1α</sub>                |                   | +1Li                       |
| 383.2126                  | 0.97                         | 1                   | 383.2126      | -0.06          | B <sub>1α</sub>                | H                 | +1Li                       |
| 406.2235                  | 0.79                         | 1                   | 406.2235      | -0.03          | C <sub>1α</sub>                | -H                | +2Li                       |
| 420.2251                  | 0.12                         | 2                   | 840.4511      | -1.12          | Z <sub>1β</sub>                |                   | +2Li                       |
| 436.2427                  | 0.07                         | 1                   | 436.2427      | -0.03          | Z <sub>1α</sub>                | H                 | 0                          |
| 442.2509                  | 0.96                         | 1                   | 442.2509      | -0.03          | Z <sub>1α</sub>                |                   | +1Li                       |
| 442.7270                  | 0.11                         | 2                   | 885.4564      | -2.76          | <sup>2,5</sup> A <sub>3</sub>  |                   | 0                          |
| 443.2278                  | 0.39                         | 2                   | 886.4566      | -1.13          | <sup>1,5</sup> X <sub>1β</sub> |                   | +2Li                       |
| 454.2259                  | 0.08                         | 1                   | 454.2259      | -0.04          | <sup>1,3</sup> A <sub>2α</sub> | -2H               | +1Li                       |
| 454.2259                  | 0.08                         | 1                   | 454.2259      | -0.04          | <sup>2,4</sup> A <sub>2α</sub> | -2H               | +1Li                       |
| 456.2416                  | 0.46                         | 1                   | 456.2415      | 0.11           | <sup>1,3</sup> A <sub>2α</sub> |                   | +1Li                       |
| 456.2416                  | 0.46                         | 1                   | 456.2415      | 0.11           | <sup>2,4</sup> A <sub>2α</sub> |                   | +1Li                       |
| 458.2458                  | 1.11                         | 1                   | 458.2458      | -0.04          | Y <sub>1α</sub>                | -2H               | +1Li                       |
| 460.2615                  | 0.30                         | 1                   | 460.2614      | 0.11           | Y <sub>1α</sub>                |                   | +1Li                       |
| 466.2696                  | 1.15                         | 1                   | 466.2696      | -0.09          | Y <sub>1α</sub>                | -H                | +2Li                       |
| 471.2404                  | 0.14                         | 2                   | 942.4828      | -2.20          | <sup>3,5</sup> X <sub>1α</sub> | -2H               | +2Li                       |
| 485.2573                  | 0.37                         | 2                   | 970.5141      | 0.50           | <sup>0,4</sup> X <sub>1α</sub> | -2H               | +2Li                       |
| 485.2573                  | 0.37                         | 2                   | 970.5141      | 0.50           | <sup>0,4</sup> X <sub>0</sub>  | -2H               | +2Li                       |
| 486.2647                  | 1.42                         | 2                   | 972.5248      | 4.74           | <sup>1,5</sup> A <sub>3</sub>  | 2H                | 0                          |



**Supporting Information for EED of Glycans**

|           |      |   |           |       |                     |                                |      |
|-----------|------|---|-----------|-------|---------------------|--------------------------------|------|
| 486.2647  | 1.42 | 2 | 972.5297  | -0.34 | $^{0,4}X_{1\alpha}$ |                                | +2Li |
| 486.2647  | 1.42 | 2 | 972.5297  | -0.34 | $^{0,4}X_0$         |                                | +2Li |
| 488.2564  | 1.52 | 1 | 488.2563  | 0.10  | $^{1,5}X_{1\alpha}$ |                                | +1Li |
| 491.7638  | 0.10 | 2 | 983.5244  | 3.31  | $^{1,3}X_{2\alpha}$ | 2H                             | +1Li |
| 493.2547  | 0.09 | 2 | 986.5090  | 0.37  | $^{1,3}X_{2\alpha}$ | -2H                            | +2Li |
| 494.2620  | 0.16 | 2 | 988.5247  | -0.70 | $^{1,3}X_{2\alpha}$ |                                | +2Li |
| 500.2619  | 0.21 | 2 | 1000.5197 | 4.06  | $B_3$               | 2H                             | 0    |
| 500.2619  | 0.21 | 2 | 1000.5247 | -0.85 | $^{0,4}X_{1\beta}$  | -2H                            | +2Li |
| 501.2695  | 0.37 | 2 | 1002.5403 | -1.30 | $^{0,4}X_{1\beta}$  |                                | +2Li |
| 501.7744  | 0.15 | 2 | 1003.5482 | 0.69  | $^{0,4}X_{1\beta}$  | H                              | +2Li |
| 512.2679  | 0.06 | 1 | 512.2678  | 0.20  | $^{2,5}A_{2\alpha}$ | -2H                            | +1Li |
| 516.2875  | 0.22 | 1 | 516.2877  | -0.38 | $^{0,2}X_{1\alpha}$ |                                | +1Li |
| 538.2909  | 0.03 | 1 | 538.2908  | 0.21  | $^{2,5}X_{1\alpha}$ | -H                             | +2Li |
| 556.2940  | 0.50 | 1 | 556.2940  | 0.02  | $^{1,5}A_{2\alpha}$ | -2H                            | +1Li |
| 558.3101  | 0.07 | 1 | 558.3096  | 0.85  | $^{1,5}A_{2\alpha}$ |                                | +1Li |
| 586.3045  | 0.11 | 1 | 586.3046  | -0.12 | $B_{2\alpha}$       |                                | +1Li |
| 588.3089  | 0.10 | 1 | 588.3088  | 0.13  | $^{1,3}X_{1\alpha}$ | -2H                            | +1Li |
| 588.3089  | 0.10 | 1 | 588.3088  | 0.13  | $^{2,4}X_{1\alpha}$ | -2H                            | +1Li |
| 590.3246  | 0.10 | 1 | 590.3245  | 0.19  | $^{1,3}X_{1\alpha}$ |                                | +1Li |
| 590.3246  | 0.10 | 1 | 590.3245  | 0.19  | $^{2,4}X_{1\alpha}$ |                                | +1Li |
| 596.3323  | 0.12 | 1 | 596.3326  | -0.63 | $^{1,3}X_{1\alpha}$ | -H                             | +2Li |
| 596.3323  | 0.12 | 1 | 596.3326  | -0.63 | $^{2,4}X_{1\alpha}$ | -H                             | +2Li |
| 602.2994  | 1.03 | 1 | 602.2995  | -0.18 | $C_{2\alpha}$       | -2H                            | +1Li |
| 610.3228  | 0.14 | 1 | 610.3233  | -0.82 | $C_{2\alpha}$       | -H                             | +2Li |
| 638.3433  | 2.42 | 1 | 638.3432  | 0.21  | $Z_{2\alpha}$       | -CH <sub>3</sub>               | +2Li |
| 662.3463  | 1.32 | 1 | 662.3456  | 1.13  | $Y_{2\alpha}$       | -2H                            | +1Li |
| 664.3613  | 4.43 | 1 | 664.3612  | 0.17  | $Y_{2\alpha}$       |                                | +1Li |
| 670.3694  | 5.45 | 1 | 670.3694  | -0.02 | $Y_{2\alpha}$       | -H                             | +2Li |
| 674.3569  | 0.12 | 1 | 674.3570  | -0.20 | $^{3,5}A_3$         |                                | +1Li |
| 734.3669  | 0.20 | 1 | 734.3667  | 0.27  | $^{1,3}X_0$         | -2H                            | +1Li |
| 748.3824  | 0.48 | 1 | 748.3823  | 0.07  | $^{0,2}X_{2\alpha}$ |                                | +1Li |
| 750.3618  | 0.24 | 1 | 750.3616  | 0.23  | $^{1,5}X_{2\alpha}$ |                                | +1Li |
| 833.4354  | 0.24 | 1 | 833.4351  | 0.35  | $Z_{1\beta}$        |                                | +1Li |
| 857.4541  | 0.34 | 1 | 857.4539  | 0.27  | $Y_{1\beta}$        | -H                             | +2Li |
| 924.4881  | 0.07 | 1 | 924.4836  | 4.82  | $^{1,4}A_3$         | -2H                            | +2Li |
| 981.5074  | 0.05 | 1 | 981.5087  | -1.32 | $^{1,3}X_{2\alpha}$ |                                | +1Li |
| 1013.5328 | 0.15 | 1 | 1013.5349 | -2.09 | $^{1,3}X_{2\alpha}$ | OCH <sub>4</sub>               | +1Li |
| 1045.5593 | 0.20 | 1 | 1045.5587 | 0.60  | $^{0,4}X_{1\beta}$  | OC <sub>2</sub> H <sub>3</sub> | +2Li |

**Supporting Information for EED of Glycans**

**Table S5.** List of ECD fragment ions of the doubly lithiated, permethylated, and <sup>18</sup>O-Labeled Sialyl Lewis A at *m/z* 523.2830.

| Exp. <i>m/z</i><br>(Da/e) | Relative<br>Intensity<br>(%) | charge<br>state ( <i>z</i> ) | Theo.<br>Mass | Error<br>(ppm) | Fragment<br>Types              | Loss or<br>Gain   | number of<br>metal adducts |
|---------------------------|------------------------------|------------------------------|---------------|----------------|--------------------------------|-------------------|----------------------------|
| 376.1969                  | 0.02                         | 1                            | 376.1966      | 0.78           | B <sub>1α</sub>                | H                 | 0                          |
| 406.2236                  | 0.87                         | 1                            | 406.2235      | 0.20           | C <sub>1α</sub>                | -H                | +2Li                       |
| 419.2553                  | 0.68                         | 1                            | 419.2563      | -2.45          | Z <sub>1α</sub>                | -OCH <sub>2</sub> | +2Li                       |
| 460.2616                  | 0.09                         | 1                            | 460.2614      | 0.31           | Y <sub>1α</sub>                |                   | +1Li                       |
| 466.2695                  | 1.06                         | 1                            | 466.2696      | -0.29          | Y <sub>1α</sub>                | -H                | +2Li                       |
| 520.2916                  | 0.31                         | 1                            | 520.2916      | 0.04           | <sup>2,5</sup> A <sub>2α</sub> | -H                | +2Li                       |
| 536.2865                  | 0.05                         | 1                            | 536.2865      | -0.02          | <sup>0,2</sup> A <sub>2α</sub> | -H                | +2Li                       |
| 566.3221                  | 0.91                         | 1                            | 566.3221      | -0.01          | <sup>2,4</sup> X <sub>1α</sub> | -OCH <sub>3</sub> | +2Li                       |
| 566.3221                  | 0.91                         | 1                            | 566.3221      | -0.01          | <sup>1,3</sup> X <sub>1α</sub> | -OCH <sub>3</sub> | +2Li                       |
| 602.2997                  | 0.15                         | 1                            | 602.2995      | 0.33           | C <sub>2α</sub>                | -2H               | +1Li                       |
| 610.3234                  | 0.19                         | 1                            | 610.3233      | 0.18           | C <sub>2α</sub>                | -H                | +2Li                       |
| 654.3739                  | 0.05                         | 1                            | 654.3745      | -0.89          | Z <sub>2α</sub>                | H                 | +2Li                       |
| 664.3607                  | 0.43                         | 1                            | 664.3612      | -0.75          | Y <sub>2α</sub>                |                   | +1Li                       |
| 670.3695                  | 5.41                         | 1                            | 670.3694      | 0.17           | Y <sub>2α</sub>                | -H                | +2Li                       |
| 748.3828                  | 0.03                         | 1                            | 748.3823      | 0.64           | <sup>0,2</sup> X <sub>2α</sub> |                   | +1Li                       |
| 821.4325                  | 0.14                         | 1                            | 821.4351      | -3.20          | Y <sub>1β</sub>                | -OCH <sub>2</sub> | +1Li                       |
| 843.4747                  | 0.28                         | 1                            | 843.4746      | 0.07           | Z <sub>1β</sub>                | 3H                | +2Li                       |
| 851.4429                  | 0.03                         | 1                            | 851.4457      | -3.31          | Y <sub>1β</sub>                |                   | +1Li                       |
| 857.4537                  | 0.03                         | 1                            | 857.4539      | -0.23          | Y <sub>1β</sub>                | -H                | +2Li                       |
| 912.4854                  | 0.04                         | 1                            | 912.4872      | -1.98          | <sup>2,4</sup> X <sub>2α</sub> | 2H                | +1Li                       |
| 951.4956                  | 0.07                         | 1                            | 951.4981      | -2.64          | <sup>0,3</sup> X <sub>1β</sub> |                   | +1Li                       |
| 951.4956                  | 0.07                         | 1                            | 951.4981      | -2.64          | <sup>1,3</sup> X <sub>1β</sub> |                   | +1Li                       |
| 951.4956                  | 0.07                         | 1                            | 951.4981      | -2.64          | <sup>2,4</sup> X <sub>1β</sub> |                   | +1Li                       |
| 969.5031                  | 0.07                         | 1                            | 969.5013      | 1.84           | <sup>1,5</sup> A <sub>3</sub>  | -H                | 0                          |
| 983.5220                  | 0.11                         | 1                            | 983.5244      | -2.40          | <sup>1,3</sup> X <sub>2α</sub> | 2H                | +1Li                       |
| 999.5167                  | 0.11                         | 1                            | 999.5119      | 4.81           | B <sub>3</sub>                 | H                 | 0                          |

**Supporting Information for EED of Glycans**

**Table S6.** List of EED fragment ions of the doubly lithiated, permethylated, and <sup>18</sup>O-Labeled Sialyl Lewis A at *m/z* 523.2830.

| Exp. <i>m/z</i><br>(Da/e) | Relative<br>Intensity<br>(%) | charge<br>state (z) | Theo.<br>Mass | Error<br>(ppm) | Fragment<br>Types                               | Loss or<br>Gain | number of<br>metal adducts |
|---------------------------|------------------------------|---------------------|---------------|----------------|-------------------------------------------------|-----------------|----------------------------|
| 211.1150                  | 0.32                         | 1                   | 211.1152      | -1.09          | C <sub>1β</sub>                                 | -2H             | +1Li                       |
| 213.1306                  | 0.19                         | 1                   | 213.1309      | -1.34          | C <sub>1β</sub>                                 |                 | +1Li                       |
| 219.1388                  | 0.36                         | 1                   | 219.1391      | -1.24          | C <sub>1β</sub>                                 | -H              | +2Li                       |
| 236.1467                  | 0.16                         | 1                   | 236.1469      | -0.72          | <sup>3,5</sup> A <sub>1α</sub>                  | -2H             | +1Li                       |
| 238.1623                  | 0.24                         | 1                   | 238.1625      | -0.95          | <sup>3,5</sup> A <sub>1α</sub>                  |                 | +1Li                       |
| 252.1415                  | 0.05                         | 1                   | 252.1418      | -1.10          | <sup>0,3</sup> A <sub>1α</sub>                  | -2H             | +1Li                       |
| 280.1728                  | 0.08                         | 1                   | 280.1731      | -1.04          | <sup>2,5</sup> A <sub>1α</sub>                  | -2H             | +1Li                       |
| 283.1727                  | 0.15                         | 1                   | 283.1727      | -0.15          | <sup>3,5</sup> A <sub>3</sub>                   |                 | +1Li                       |
| 294.1885                  | 0.07                         | 1                   | 294.1888      | -0.78          | <sup>1,5</sup> A <sub>1α</sub>                  | -2H             | +1Li                       |
| 296.2042                  | 0.03                         | 1                   | 296.2044      | -0.66          | <sup>1,5</sup> A <sub>1α</sub>                  |                 | +1Li                       |
| 297.1769                  | 0.05                         | 1                   | 297.1758      | 3.70           | <sup>0,2</sup> A <sub>1α</sub>                  | -H              | +1Li                       |
| 340.1941                  | 4.28                         | 1                   | 340.1942      | -0.36          | <sup>1,3</sup> X <sub>2α</sub> /B <sub>2α</sub> | CH <sub>4</sub> | +1Li                       |
| 376.1966                  | 5.20                         | 1                   | 376.1966      | -0.03          | B <sub>1α</sub>                                 | H               | 0                          |
| 377.6989                  | 0.18                         | 2                   | 755.3983      | -0.68          | <sup>0,2</sup> X <sub>2α</sub>                  |                 | +2Li                       |
| 382.2048                  | 2.67                         | 1                   | 382.2048      | 0.05           | B <sub>1α</sub>                                 |                 | +1Li                       |
| 383.2126                  | 0.53                         | 1                   | 383.2126      | -0.06          | B <sub>1α</sub>                                 | H               | +1Li                       |
| 384.2204                  | 0.11                         | 1                   | 384.2204      | -0.10          | B <sub>1α</sub>                                 | 2H              | +1Li                       |
| 388.2129                  | 0.05                         | 1                   | 388.2130      | -0.19          | B <sub>1α</sub>                                 | -H              | +2Li                       |
| 390.2286                  | 0.07                         | 1                   | 390.2286      | -0.01          | B <sub>1α</sub>                                 | H               | +2Li                       |
| 398.1997                  | 0.09                         | 1                   | 398.1997      | 0.03           | C <sub>1α</sub>                                 | -2H             | +1Li                       |
| 400.2155                  | 0.14                         | 1                   | 400.2153      | 0.43           | C <sub>1α</sub>                                 |                 | +1Li                       |
| 406.2235                  | 0.81                         | 1                   | 406.2235      | -0.03          | C <sub>1α</sub>                                 | -H              | +2Li                       |
| 420.2256                  | 0.10                         | 2                   | 840.4511      | 0.04           | Z <sub>1β</sub>                                 |                 | +2Li                       |
| 428.2231                  | 0.07                         | 2                   | 856.4460      | 0.21           | Y <sub>1β</sub>                                 | -2H             | +2Li                       |
| 436.2428                  | 0.44                         | 1                   | 436.2427      | 0.18           | Z <sub>1α</sub>                                 | H               | 0                          |
| 442.2508                  | 8.87                         | 1                   | 442.2509      | -0.23          | Z <sub>1α</sub>                                 |                 | +1Li                       |
| 443.2279                  | 0.42                         | 2                   | 886.4566      | -0.92          | <sup>1,5</sup> X <sub>1β</sub>                  |                 | +2Li                       |
| 456.2417                  | 0.16                         | 2                   | 912.4872      | -4.19          | <sup>2,4</sup> X <sub>2α</sub>                  | 2H              | +1Li                       |
| 457.2443                  | 0.14                         | 2                   | 914.4879      | 0.77           | <sup>0,2</sup> X <sub>1β</sub>                  |                 | +2Li                       |
| 457.2443                  | 0.14                         | 2                   | 914.4879      | 0.77           | <sup>1,4</sup> X <sub>1β</sub>                  |                 | +2Li                       |
| 458.2458                  | 0.41                         | 1                   | 458.2458      | -0.04          | Y <sub>1α</sub>                                 | -2H             | +1Li                       |
| 460.2615                  | 0.27                         | 1                   | 460.2614      | 0.11           | Y <sub>1α</sub>                                 |                 | +1Li                       |

**Supporting Information for EED of Glycans**

|          |      |   |           |       |                     |                   |      |
|----------|------|---|-----------|-------|---------------------|-------------------|------|
| 464.2655 | 0.21 | 1 | 464.2654  | 0.25  | $^{1,3}A_{2\alpha}$ | H                 | +2Li |
| 464.2655 | 0.21 | 1 | 464.2654  | 0.25  | $^{2,4}A_{2\alpha}$ | H                 | +2Li |
| 466.2696 | 1.42 | 1 | 466.2696  | -0.09 | $Y_{1\alpha}$       | -H                | +2Li |
| 485.2573 | 0.35 | 2 | 970.5141  | 0.50  | $^{0,4}X_{1\alpha}$ | -2H               | +2Li |
| 485.2573 | 0.35 | 2 | 970.5141  | 0.50  | $^{0,4}X_0$         | -2H               | +2Li |
| 486.2647 | 2.17 | 2 | 972.5248  | 4.74  | $^{1,5}A_3$         | 2H                | 0    |
| 486.2647 | 2.17 | 2 | 972.5297  | -0.34 | $^{0,4}X_{1\alpha}$ |                   | +2Li |
| 486.2647 | 2.17 | 2 | 972.5297  | -0.34 | $^{0,4}X_0$         |                   | +2Li |
| 488.2563 | 1.22 | 1 | 488.2563  | -0.15 | $^{1,5}X_{1\alpha}$ |                   | +1Li |
| 491.7638 | 0.11 | 2 | 983.5244  | 3.31  | $^{1,3}X_{2\alpha}$ | 2H                | +1Li |
| 493.2549 | 0.08 | 2 | 986.5090  | 0.81  | $^{1,3}X_{2\alpha}$ | -2H               | +2Li |
| 494.2620 | 0.12 | 2 | 988.5247  | -0.70 | $^{1,3}X_{2\alpha}$ |                   | +2Li |
| 500.2626 | 0.26 | 2 | 1000.5247 | 0.55  | $^{0,4}X_{1\beta}$  | -2H               | +2Li |
| 501.2711 | 0.22 | 2 | 1002.5403 | 1.86  | $^{0,4}X_{1\beta}$  |                   | +2Li |
| 501.7742 | 0.04 | 2 | 1003.5482 | 0.27  | $^{0,4}X_{1\beta}$  | H                 | +2Li |
| 512.2680 | 0.06 | 1 | 512.2678  | 0.44  | $^{2,5}A_{2\alpha}$ | -2H               | +1Li |
| 514.2833 | 0.08 | 1 | 514.2834  | -0.20 | $^{2,5}A_{2\alpha}$ |                   | +1Li |
| 516.2876 | 0.10 | 1 | 516.2877  | -0.14 | $^{0,2}X_{1\alpha}$ |                   | +1Li |
| 520.2916 | 0.34 | 1 | 520.2916  | 0.04  | $^{2,5}A_{2\alpha}$ | -H                | +2Li |
| 528.2629 | 0.03 | 1 | 528.2627  | 0.37  | $^{0,2}A_{2\alpha}$ | -2H               | +1Li |
| 530.2785 | 0.08 | 1 | 530.2783  | 0.32  | $^{0,2}A_{2\alpha}$ |                   | +1Li |
| 532.2827 | 0.07 | 1 | 532.2826  | 0.21  | $^{2,5}X_{1\alpha}$ |                   | +1Li |
| 546.2982 | 0.44 | 1 | 546.2982  | -0.02 | $^{1,4}X_{1\alpha}$ |                   | +1Li |
| 556.2941 | 0.36 | 1 | 556.2940  | 0.24  | $^{1,5}A_{2\alpha}$ | -2H               | +1Li |
| 558.3097 | 0.06 | 1 | 558.3096  | 0.09  | $^{1,5}A_{2\alpha}$ |                   | +1Li |
| 586.3046 | 0.09 | 1 | 586.3046  | 0.08  | $B_{2\alpha}$       |                   | +1Li |
| 588.3092 | 0.06 | 1 | 588.3088  | 0.65  | $^{1,3}X_{1\alpha}$ | -2H               | +1Li |
| 588.3092 | 0.06 | 1 | 588.3088  | 0.65  | $^{2,4}X_{1\alpha}$ | -2H               | +1Li |
| 590.3241 | 0.07 | 1 | 590.3245  | -0.64 | $^{1,3}X_{1\alpha}$ |                   | +1Li |
| 590.3241 | 0.07 | 1 | 590.3245  | -0.64 | $^{2,4}X_{1\alpha}$ |                   | +1Li |
| 596.3326 | 0.06 | 1 | 596.3326  | -0.12 | $^{1,3}X_{1\alpha}$ | -H                | +2Li |
| 596.3326 | 0.06 | 1 | 596.3326  | -0.12 | $^{2,4}X_{1\alpha}$ | -H                | +2Li |
| 602.2995 | 1.26 | 1 | 602.2995  | 0.02  | $C_{2\alpha}$       | -2H               | +1Li |
| 604.3152 | 0.22 | 1 | 604.3151  | 0.08  | $C_{2\alpha}$       |                   | +1Li |
| 610.3234 | 0.15 | 1 | 610.3233  | 0.18  | $C_{2\alpha}$       | -H                | +2Li |
| 616.3401 | 1.01 | 1 | 616.3401  | -0.01 | $Z_{2\alpha}$       | -OCH <sub>2</sub> | +1Li |
| 646.3506 | 0.35 | 1 | 646.3506  | -0.11 | $Z_{2\alpha}$       |                   | +1Li |
| 662.3460 | 0.65 | 1 | 662.3456  | 0.67  | $Y_{2\alpha}$       | -2H               | +1Li |
| 664.3612 | 3.00 | 1 | 664.3612  | -0.02 | $Y_{2\alpha}$       |                   | +1Li |
| 670.3695 | 1.35 | 1 | 670.3694  | 0.17  | $Y_{2\alpha}$       | -H                | +2Li |

**Supporting Information for EED of Glycans**

|          |      |   |          |       |                     |     |      |
|----------|------|---|----------|-------|---------------------|-----|------|
| 748.3824 | 0.62 | 1 | 748.3823 | 0.07  | $^{0,2}X_{2\alpha}$ |     | +1Li |
| 750.3617 | 0.14 | 1 | 750.3616 | 0.07  | $^{1,5}X_{2\alpha}$ |     | +1Li |
| 761.3775 | 0.05 | 1 | 761.3776 | -0.14 | $^{3,5}X_0$         | -2H | +1Li |
| 833.4349 | 0.17 | 1 | 833.4351 | -0.31 | $Z_{1\beta}$        |     | +1Li |
| 857.4542 | 0.34 | 1 | 857.4539 | 0.41  | $Y_{1\beta}$        | -H  | +2Li |
| 879.4416 | 0.03 | 1 | 879.4406 | 1.10  | $^{1,5}X_{1\beta}$  |     | +1Li |
| 965.5149 | 0.07 | 1 | 965.5137 | 1.19  | $^{0,4}X_{1\alpha}$ |     | +1Li |
| 965.5149 | 0.07 | 1 | 965.5137 | 1.19  | $^{0,4}X_0$         |     | +1Li |
| 981.5071 | 0.03 | 1 | 981.5087 | -1.63 | $^{1,3}X_{2\alpha}$ |     | +1Li |

**Supporting Information for EED of Glycans**

**Table S7.** List of ECD fragment ions of the doubly lithiated, permethylated, <sup>18</sup>O-labeled LNT at *m/z* 459.7513.

| Exp. <i>m/z</i><br>(Da/e) | Relative<br>Intensity<br>(%) | charge<br>state ( <i>z</i> ) | Theo.<br>Mass | Error<br>(ppm) | Fragment<br>Types             | Loss or<br>Gain | number of<br>metal adducts |
|---------------------------|------------------------------|------------------------------|---------------|----------------|-------------------------------|-----------------|----------------------------|
| 249.1502                  | 0.32                         | 1                            | 249.1496      | 2.34           | C <sub>1</sub>                | -H              | +2Li                       |
| 251.1544                  | 0.27                         | 1                            | 251.1539      | 2.14           | Y <sub>1</sub>                | -H              | +2Li                       |
| 279.1492                  | 1.37                         | 1                            | 279.1488      | 1.49           | <sup>1,5</sup> X <sub>1</sub> | -H              | +2Li                       |
| 305.1762                  | 0.03                         | 1                            | 305.1758      | 1.26           | <sup>2,4</sup> A <sub>2</sub> | -H              | +2Li                       |
| 307.1804                  | 0.14                         | 1                            | 307.1801      | 0.96           | <sup>0,2</sup> X <sub>1</sub> | -H              | +2Li                       |
| 337.1909                  | 0.03                         | 1                            | 337.1906      | 0.69           | <sup>1,4</sup> X <sub>1</sub> | -H              | +2Li                       |
| 339.2065                  | 0.04                         | 1                            | 339.2063      | 0.61           | <sup>1,4</sup> X <sub>1</sub> | H               | +2Li                       |
| 346.2026                  | 0.03                         | 1                            | 346.2024      | 0.67           | <sup>1,3</sup> A <sub>2</sub> | -H              | +2Li                       |
| 363.2179                  | 0.29                         | 1                            | 363.2177      | 0.56           | <sup>2,5</sup> A <sub>2</sub> | -H              | +2Li                       |
| 381.2171                  | 0.15                         | 1                            | 381.2169      | 0.61           | <sup>1,3</sup> X <sub>1</sub> | -H              | +2Li                       |
| 381.2171                  | 0.15                         | 1                            | 381.2169      | 0.61           | <sup>2,4</sup> X <sub>1</sub> | -H              | +2Li                       |
| 431.2350                  | 0.70                         | 1                            | 431.2349      | 0.18           | Z <sub>2</sub>                |                 | +1Li                       |
| 439.2587                  | 0.03                         | 1                            | 439.2587      | -0.08          | Z <sub>2</sub>                | H               | +2Li                       |
| 447.2308                  | 0.03                         | 1                            | 447.2298      | 2.21           | Y <sub>2</sub>                | -2H             | +1Li                       |
| 448.2375                  | 0.79                         | 1                            | 448.2376      | -0.34          | Y <sub>2</sub>                | -H              | +1Li                       |
| 449.2457                  | 0.13                         | 1                            | 449.2455      | 0.52           | Y <sub>2</sub>                |                 | +1Li                       |
| 450.2862                  | 0.40                         | 1                            | 450.2861      | 0.19           | <sup>1,5</sup> A <sub>2</sub> | H               | +2Li                       |
| 450.7329                  | 0.04                         | 2                            | 901.4677      | -2.03          | C <sub>4</sub>                | -2H             | +2Li                       |
| 455.2536                  | 3.76                         | 1                            | 455.2536      | -0.09          | Y <sub>2</sub>                | -H              | +2Li                       |
| 464.2491                  | 0.15                         | 1                            | 464.2490      | 0.17           | B <sub>2</sub>                | H               | 0                          |
| 470.2572                  | 0.03                         | 1                            | 470.2572      | -0.03          | B <sub>2</sub>                |                 | +1Li                       |
| 478.2809                  | 2.67                         | 1                            | 478.2810      | -0.27          | B <sub>2</sub>                | H               | +2Li                       |
| 494.2758                  | 0.34                         | 1                            | 494.2759      | -0.33          | C <sub>2</sub>                | -H              | +2Li                       |
| 581.3213                  | 0.03                         | 1                            | 581.3242      | -4.89          | <sup>1,3</sup> X <sub>2</sub> | 2H              | +1Li                       |
| 594.3279                  | 0.04                         | 1                            | 594.3284      | -0.84          | <sup>1,4</sup> A <sub>3</sub> | -H              | +2Li                       |
| 652.3698                  | 0.10                         | 1                            | 652.3702      | -0.67          | <sup>1,5</sup> A <sub>3</sub> | -H              | +2Li                       |
| 678.3764                  | 0.02                         | 1                            | 678.3769      | -0.68          | Z <sub>3</sub>                | 2H              | +1Li                       |
| 682.3800                  | 0.11                         | 1                            | 682.3809      | -1.22          | B <sub>3</sub>                | H               | +2Li                       |
| 684.3847                  | 2.95                         | 1                            | 684.3851      | -0.50          | Z <sub>3</sub>                | H               | +2Li                       |
| 698.3754                  | 0.27                         | 1                            | 698.3757      | -0.45          | C <sub>3</sub>                | -H              | +2Li                       |
| 700.3797                  | 0.24                         | 1                            | 700.3799      | -0.36          | Y <sub>3</sub>                | -H              | +2Li                       |
| 779.4130                  | 0.35                         | 1                            | 779.4121      | 1.14           | <sup>0,3</sup> A <sub>4</sub> | H               | +1Li                       |

**Supporting Information for EED of Glycans**

|          |      |   |          |       |             |    |      |
|----------|------|---|----------|-------|-------------|----|------|
| 782.4212 | 0.02 | 1 | 782.4243 | -3.87 | $^{1,4}X_3$ | 2H | +1Li |
| 785.4218 | 0.04 | 1 | 785.4203 | 1.91  | $^{0,3}A_4$ |    | +2Li |
| 826.4483 | 0.05 | 1 | 826.4504 | -2.56 | $^{1,3}X_3$ | 2H | +1Li |
| 826.4483 | 0.05 | 1 | 826.4504 | -2.56 | $^{1,3}X_0$ | 2H | +1Li |
| 826.4483 | 0.05 | 1 | 826.4504 | -2.56 | $^{2,4}X_3$ | 2H | +1Li |
| 896.4670 | 0.97 | 1 | 896.4673 | -0.35 | $C_4$       |    | +1Li |

**Supporting Information for EED of Glycans**

**Table S8.** List of EED fragment ions of the doubly lithiated, permethylated, <sup>18</sup>O-labeled LNT at *m/z* 459.7513.

| Exp. <i>m/z</i><br>(Da/e) | Relative<br>Intensity<br>(%) | charge<br>state ( <i>z</i> ) | Theo.<br>Mass | Error<br>(ppm) | Fragment<br>Types             | Loss or<br>Gain | number of<br>metal adducts |
|---------------------------|------------------------------|------------------------------|---------------|----------------|-------------------------------|-----------------|----------------------------|
| 195.1204                  | 0.30                         | 1                            | 195.1203      | 0.46           | <sup>1,5</sup> A <sub>1</sub> | -2H             | +1Li                       |
| 197.1360                  | 0.11                         | 1                            | 197.1360      | 0.17           | <sup>1,5</sup> A <sub>1</sub> |                 | +1Li                       |
| 225.1309                  | 0.31                         | 1                            | 225.1309      | 0.08           | B <sub>1</sub>                |                 | +1Li                       |
| 227.1352                  | 0.71                         | 1                            | 227.1351      | 0.28           | Z <sub>1</sub>                |                 | +1Li                       |
| 241.1258                  | 2.55                         | 1                            | 241.1258      | -0.01          | C <sub>1</sub>                | -2H             | +1Li                       |
| 243.1415                  | 1.57                         | 1                            | 243.1414      | 0.20           | C <sub>1</sub>                |                 | +1Li                       |
| 245.1458                  | 0.51                         | 1                            | 245.1457      | 0.45           | Y <sub>1</sub>                |                 | +1Li                       |
| 249.1497                  | 2.66                         | 1                            | 249.1496      | 0.32           | C <sub>1</sub>                | -H              | +2Li                       |
| 251.1539                  | 3.92                         | 1                            | 251.1539      | 0.14           | Y <sub>1</sub>                | -H              | +2Li                       |
| 273.1405                  | 2.26                         | 1                            | 273.1406      | -0.38          | <sup>1,5</sup> X <sub>1</sub> |                 | +1Li                       |
| 299.1676                  | 0.18                         | 1                            | 299.1676      | -0.14          | <sup>2,4</sup> A <sub>2</sub> |                 | +1Li                       |
| 301.1718                  | 0.36                         | 1                            | 301.1719      | -0.34          | <sup>0,2</sup> X <sub>1</sub> |                 | +1Li                       |
| 307.1801                  | 0.21                         | 1                            | 307.1801      | 0.06           | <sup>0,2</sup> X <sub>1</sub> | -H              | +2Li                       |
| 325.6814                  | 0.14                         | 2                            | 651.3624      | 0.56           | <sup>1,5</sup> A <sub>3</sub> | -2H             | +2Li                       |
| 338.6841                  | 0.40                         | 2                            | 677.3690      | -1.21          | Z <sub>3</sub>                | H               | +1Li                       |
| 340.1942                  | 0.14                         | 1                            | 340.1942      | 0.05           | <sup>1,3</sup> A <sub>2</sub> |                 | +1Li                       |
| 349.6914                  | 0.14                         | 2                            | 699.3835      | -1.08          | C <sub>3</sub>                |                 | +2Li                       |
| 355.1939                  | 0.12                         | 1                            | 355.1939      | 0.12           | <sup>2,5</sup> A <sub>2</sub> | -2H             | +1Li                       |
| 359.2252                  | 0.11                         | 1                            | 359.2252      | 0.07           | <sup>2,5</sup> A <sub>2</sub> | 2H              | +1Li                       |
| 364.6911                  | 0.73                         | 2                            | 729.3827      | -0.70          | <sup>1,5</sup> X <sub>3</sub> |                 | +2Li                       |
| 377.7044                  | 0.13                         | 2                            | 755.4097      | -1.24          | <sup>2,4</sup> A <sub>4</sub> |                 | +2Li                       |
| 378.7067                  | 0.10                         | 2                            | 757.4140      | -0.84          | <sup>0,2</sup> X <sub>3</sub> |                 | +2Li                       |
| 382.2046                  | 0.11                         | 1                            | 382.2048      | -0.44          | <sup>1,4</sup> A <sub>2</sub> | -2H             | +1Li                       |
| 384.7123                  | 1.04                         | 2                            | 769.4254      | -1.06          | <sup>3,5</sup> A <sub>4</sub> |                 | +2Li                       |
| 391.2125                  | 0.13                         | 2                            | 782.4243      | 0.97           | <sup>1,4</sup> X <sub>3</sub> | 2H              | +1Li                       |
| 421.7254                  | 1.03                         | 2                            | 843.4508      | 0.00           | <sup>0,4</sup> X <sub>3</sub> | -2H             | +2Li                       |
| 421.7254                  | 1.03                         | 2                            | 843.4508      | 0.00           | <sup>0,4</sup> X <sub>2</sub> | -2H             | +2Li                       |
| 421.7254                  | 1.03                         | 2                            | 843.4508      | 0.00           | <sup>0,4</sup> X <sub>1</sub> | -2H             | +2Li                       |
| 421.7254                  | 1.03                         | 2                            | 843.4508      | 0.00           | <sup>0,4</sup> X <sub>0</sub> | -2H             | +2Li                       |
| 422.7327                  | 1.21                         | 2                            | 845.4664      | -1.26          | <sup>0,4</sup> X <sub>3</sub> |                 | +2Li                       |
| 422.7327                  | 1.21                         | 2                            | 845.4664      | -1.26          | <sup>0,4</sup> X <sub>2</sub> |                 | +2Li                       |



**Supporting Information for EED of Glycans**

|          |      |   |          |       |                |     |      |
|----------|------|---|----------|-------|----------------|-----|------|
| 422.7327 | 1.21 | 2 | 845.4664 | -1.26 | $^{0,4}X_1$    |     | +2Li |
| 422.7327 | 1.21 | 2 | 845.4664 | -1.26 | $^{0,4}X_0$    |     | +2Li |
| 428.7386 | 1.61 | 2 | 857.4778 | -0.81 | $^{1,5}A_4$    |     | +2Li |
| 431.2350 | 2.13 | 1 | 431.2349 | 0.18  | Z <sub>2</sub> |     | +1Li |
| 440.2468 | 0.17 | 1 | 440.2466 | 0.38  | $^{1,5}A_2$    | -2H | +1Li |
| 442.2623 | 0.55 | 1 | 442.2623 | 0.04  | $^{1,5}A_2$    |     | +1Li |
| 447.2298 | 1.15 | 1 | 447.2298 | -0.04 | Y <sub>2</sub> | -2H | +1Li |
| 449.2454 | 6.63 | 1 | 449.2455 | -0.16 | Y <sub>2</sub> |     | +1Li |
| 455.2536 | 7.65 | 1 | 455.2536 | -0.09 | Y <sub>2</sub> | -H  | +2Li |
| 464.2490 | 1.33 | 1 | 464.2490 | -0.09 | B <sub>2</sub> | H   | 0    |
| 470.2571 | 6.11 | 1 | 470.2572 | -0.22 | B <sub>2</sub> |     | +1Li |
| 477.2403 | 3.53 | 1 | 477.2404 | -0.15 | $^{1,5}X_2$    |     | +1Li |
| 486.2520 | 3.04 | 1 | 486.2521 | -0.22 | C <sub>2</sub> | -2H | +1Li |
| 488.2678 | 0.18 | 1 | 488.2678 | 0.04  | C <sub>2</sub> |     | +1Li |
| 544.2939 | 0.35 | 1 | 544.2939 | -0.13 | $^{1,3}A_3$    |     | +1Li |
| 544.2939 | 0.35 | 1 | 544.2939 | -0.13 | $^{2,4}A_3$    |     | +1Li |
| 573.2985 | 0.14 | 1 | 573.3003 | -3.11 | $^{1,3}X_2$    | H   | 0    |
| 588.3200 | 0.12 | 1 | 588.3202 | -0.33 | $^{1,4}A_3$    |     | +1Li |
| 594.3282 | 0.14 | 1 | 594.3284 | -0.33 | $^{1,4}A_3$    | -H  | +2Li |
| 600.3206 | 0.11 | 1 | 600.3202 | 0.73  | $^{2,5}A_3$    | -2H | +1Li |
| 602.3340 | 0.18 | 1 | 602.3358 | -3.06 | $^{2,5}A_3$    |     | +1Li |
| 620.3352 | 0.12 | 1 | 620.3350 | 0.28  | $^{2,4}X_2$    |     | +1Li |
| 644.3466 | 0.98 | 1 | 644.3464 | 0.30  | $^{1,5}A_3$    | -2H | +1Li |
| 670.3533 | 0.25 | 1 | 670.3530 | 0.35  | Z <sub>3</sub> | H   | 0    |
| 674.3571 | 0.27 | 1 | 674.3570 | 0.16  | B <sub>3</sub> |     | +1Li |
| 676.3614 | 2.52 | 1 | 676.3612 | 0.25  | Z <sub>3</sub> |     | +1Li |
| 690.3519 | 1.21 | 1 | 690.3519 | 0.02  | C <sub>3</sub> | -2H | +1Li |
| 692.3568 | 0.17 | 1 | 692.3561 | 0.99  | Y <sub>3</sub> | -2H | +1Li |
| 694.3725 | 0.14 | 1 | 694.3718 | 1.04  | Y <sub>3</sub> |     | +1Li |
| 698.3759 | 0.19 | 1 | 698.3757 | 0.25  | C <sub>3</sub> | -H  | +2Li |
| 722.3673 | 0.93 | 1 | 722.3667 | 0.83  | $^{1,5}X_3$    |     | +1Li |
| 896.4683 | 0.16 | 1 | 896.4673 | 1.14  | C <sub>4</sub> |     | +1Li |

**Supporting Information for EED of Glycans**

**Table S9.** List of EED fragment ions of the singly lithiated, permethylated, <sup>18</sup>O-labeled LNT at *m/z* 912.4872.

| Exp. <i>m/z</i><br>(Da/e) | Relative<br>Intensity<br>(%) | charge<br>state ( <i>z</i> ) | Theo.<br>Mass | Error<br>(ppm) | Fragment<br>Types             | Loss or<br>Gain                 | number of<br>metal adducts |
|---------------------------|------------------------------|------------------------------|---------------|----------------|-------------------------------|---------------------------------|----------------------------|
| 225.1306                  | 0.04                         | 1                            | 225.1309      | -1.27          | B <sub>1</sub>                |                                 | +1Li                       |
| 227.1349                  | 0.07                         | 1                            | 227.1351      | -0.99          | Z <sub>1</sub>                |                                 | +1Li                       |
| 243.1413                  | 0.27                         | 1                            | 243.1414      | -0.61          | C <sub>1</sub>                |                                 | +1Li                       |
| 245.1455                  | 0.09                         | 1                            | 245.1457      | -0.80          | Y <sub>1</sub>                |                                 | +1Li                       |
| 273.1406                  | 0.24                         | 1                            | 273.1406      | -0.04          | <sup>1,5</sup> X <sub>1</sub> |                                 | +1Li                       |
| 299.1677                  | 0.04                         | 1                            | 299.1676      | 0.16           | <sup>2,4</sup> A <sub>2</sub> |                                 | +1Li                       |
| 301.1720                  | 0.03                         | 1                            | 301.1719      | 0.26           | <sup>0,2</sup> X <sub>1</sub> |                                 | +1Li                       |
| 340.1944                  | 0.08                         | 1                            | 340.1942      | 0.59           | <sup>1,3</sup> A <sub>2</sub> |                                 | +1Li                       |
| 355.1942                  | 0.02                         | 1                            | 355.1939      | 0.98           | <sup>2,5</sup> A <sub>2</sub> | -2H                             | +1Li                       |
| 382.2051                  | 0.04                         | 1                            | 382.2048      | 0.91           | <sup>1,4</sup> A <sub>2</sub> | -2H                             | +1Li                       |
| 431.2354                  | 1.37                         | 1                            | 431.2349      | 1.18           | Z <sub>2</sub>                |                                 | +1Li                       |
| 440.2472                  | 0.13                         | 1                            | 440.2466      | 1.28           | <sup>1,5</sup> A <sub>2</sub> | -2H                             | +1Li                       |
| 442.2628                  | 0.37                         | 1                            | 442.2623      | 1.15           | <sup>1,5</sup> A <sub>2</sub> |                                 | +1Li                       |
| 449.2460                  | 6.54                         | 1                            | 449.2455      | 1.20           | Y <sub>2</sub>                |                                 | +1Li                       |
| 464.2496                  | 0.09                         | 1                            | 464.2490      | 1.22           | B <sub>2</sub>                | H                               | 0                          |
| 470.2576                  | 2.91                         | 1                            | 470.2572      | 0.82           | B <sub>2</sub>                |                                 | +1Li                       |
| 477.2409                  | 1.47                         | 1                            | 477.2404      | 1.13           | <sup>1,5</sup> X <sub>2</sub> |                                 | +1Li                       |
| 486.2526                  | 1.49                         | 1                            | 486.2521      | 0.97           | C <sub>2</sub>                | -2H                             | +1Li                       |
| 487.2607                  | 0.07                         | 1                            | 487.2599      | 1.57           | C <sub>2</sub>                | -H                              | +1Li                       |
| 488.2683                  | 0.07                         | 1                            | 488.2678      | 1.10           | C <sub>2</sub>                |                                 | +1Li                       |
| 544.2946                  | 0.17                         | 1                            | 544.2939      | 1.21           | <sup>1,3</sup> A <sub>3</sub> |                                 | +1Li                       |
| 544.2946                  | 0.17                         | 1                            | 544.2939      | 1.21           | <sup>2,4</sup> A <sub>3</sub> |                                 | +1Li                       |
| 546.2988                  | 0.03                         | 1                            | 546.2982      | 1.10           | <sup>0,2</sup> X <sub>2</sub> |                                 | +1Li                       |
| 561.2860                  | 0.02                         | 1                            | 561.2853      | 1.20           | <sup>2,5</sup> X <sub>2</sub> | -H                              | +1Li                       |
| 573.2979                  | 0.01                         | 1                            | 573.2968      | 2.07           | <sup>1,4</sup> A <sub>3</sub> | -CH <sub>3</sub>                | +1Li                       |
| 574.2939                  | 0.05                         | 1                            | 574.2932      | 1.25           | <sup>2,4</sup> X <sub>2</sub> | -OC <sub>2</sub> H <sub>6</sub> | +1Li                       |
| 600.3209                  | 0.02                         | 1                            | 600.3202      | 1.24           | <sup>2,5</sup> A <sub>3</sub> | -2H                             | +1Li                       |
| 612.3207                  | 0.01                         | 1                            | 612.3226      | -3.11          | <sup>0,2</sup> A <sub>3</sub> | H                               | 0                          |
| 614.3252                  | 0.02                         | 1                            | 614.3268      | -2.70          | <sup>2,4</sup> X <sub>2</sub> | H                               | 0                          |
| 620.3357                  | 0.11                         | 1                            | 620.3350      | 1.06           | <sup>2,4</sup> X <sub>2</sub> |                                 | +1Li                       |
| 644.3471                  | 0.57                         | 1                            | 644.3464      | 1.06           | <sup>1,5</sup> A <sub>3</sub> | -2H                             | +1Li                       |
| 670.3537                  | 0.03                         | 1                            | 670.3530      | 0.98           | Z <sub>3</sub>                | H                               | 0                          |

**Supporting Information for EED of Glycans**

|          |      |   |          |      |                               |     |      |
|----------|------|---|----------|------|-------------------------------|-----|------|
| 675.3655 | 0.03 | 1 | 675.3648 | 0.96 | B <sub>3</sub>                | H   | +1Li |
| 676.3618 | 1.41 | 1 | 676.3612 | 0.88 | Z <sub>3</sub>                |     | +1Li |
| 677.3718 | 0.08 | 1 | 677.3690 | 4.11 | Z <sub>3</sub>                | H   | +1Li |
| 690.3524 | 0.88 | 1 | 690.3519 | 0.73 | C <sub>3</sub>                | -2H | +1Li |
| 692.3576 | 0.30 | 1 | 692.3561 | 2.14 | Y <sub>3</sub>                | -2H | +1Li |
| 694.3726 | 0.03 | 1 | 694.3718 | 1.21 | Y <sub>3</sub>                |     | +1Li |
| 722.3675 | 1.06 | 1 | 722.3667 | 1.08 | <sup>1,5</sup> X <sub>3</sub> |     | +1Li |
| 748.3946 | 0.02 | 1 | 748.3937 | 1.13 | <sup>2,4</sup> A <sub>4</sub> |     | +1Li |
| 750.3986 | 0.03 | 1 | 750.3980 | 0.80 | <sup>0,2</sup> X <sub>3</sub> |     | +1Li |
| 761.4040 | 0.01 | 1 | 761.4016 | 3.13 | <sup>3,5</sup> A <sub>4</sub> | -H  | +1Li |
| 762.4101 | 0.40 | 1 | 762.4094 | 0.86 | <sup>3,5</sup> A <sub>4</sub> |     | +1Li |
| 766.3937 | 0.03 | 1 | 766.3929 | 1.02 | <sup>2,5</sup> X <sub>3</sub> |     | +1Li |
| 778.3945 | 0.04 | 1 | 778.3929 | 1.98 | <sup>1,4</sup> X <sub>3</sub> | -2H | +1Li |
| 780.4093 | 0.02 | 1 | 780.4086 | 0.92 | <sup>1,4</sup> X <sub>3</sub> |     | +1Li |
| 794.4252 | 0.02 | 1 | 794.4242 | 1.21 | <sup>0,3</sup> X <sub>3</sub> |     | +1Li |
| 794.4252 | 0.02 | 1 | 794.4242 | 1.21 | <sup>0,3</sup> X <sub>2</sub> |     | +1Li |
| 794.4252 | 0.02 | 1 | 794.4242 | 1.21 | <sup>0,3</sup> X <sub>1</sub> |     | +1Li |
| 804.4206 | 0.02 | 1 | 804.4200 | 0.78 | <sup>2,5</sup> A <sub>4</sub> | -2H | +1Li |
| 808.4042 | 0.03 | 1 | 808.4035 | 0.85 | <sup>3,5</sup> X <sub>3</sub> | -2H | +1Li |
| 808.4042 | 0.03 | 1 | 808.4035 | 0.85 | <sup>3,5</sup> X <sub>2</sub> | -2H | +1Li |
| 808.4042 | 0.03 | 1 | 808.4035 | 0.85 | <sup>3,5</sup> X <sub>1</sub> | -2H | +1Li |
| 822.4206 | 0.02 | 1 | 822.4191 | 1.80 | <sup>1,3</sup> X <sub>3</sub> | -2H | +1Li |
| 822.4206 | 0.02 | 1 | 822.4191 | 1.80 | <sup>1,3</sup> X <sub>0</sub> | -2H | +1Li |
| 822.4206 | 0.02 | 1 | 822.4191 | 1.80 | <sup>2,4</sup> X <sub>3</sub> | -2H | +1Li |
| 836.4363 | 0.57 | 1 | 836.4348 | 1.77 | <sup>0,4</sup> X <sub>3</sub> | -2H | +1Li |
| 836.4363 | 0.57 | 1 | 836.4348 | 1.77 | <sup>0,4</sup> X <sub>2</sub> | -2H | +1Li |
| 836.4363 | 0.57 | 1 | 836.4348 | 1.77 | <sup>0,4</sup> X <sub>1</sub> | -2H | +1Li |
| 836.4363 | 0.57 | 1 | 836.4348 | 1.77 | <sup>0,4</sup> X <sub>0</sub> | -2H | +1Li |
| 838.4509 | 0.32 | 1 | 838.4504 | 0.57 | <sup>0,4</sup> X <sub>3</sub> |     | +1Li |
| 838.4509 | 0.32 | 1 | 838.4504 | 0.57 | <sup>0,4</sup> X <sub>2</sub> |     | +1Li |
| 838.4509 | 0.32 | 1 | 838.4504 | 0.57 | <sup>0,4</sup> X <sub>1</sub> |     | +1Li |
| 838.4509 | 0.32 | 1 | 838.4504 | 0.57 | <sup>0,4</sup> X <sub>0</sub> |     | +1Li |
| 848.4476 | 0.20 | 1 | 848.4462 | 1.60 | <sup>1,5</sup> A <sub>4</sub> | -2H | +1Li |
| 850.4623 | 0.59 | 1 | 850.4619 | 0.49 | <sup>1,5</sup> A <sub>4</sub> |     | +1Li |

**Supporting Information for EED of Glycans**

**Table S10.** List of EED fragment ions of the singly cesiated, permethylated, <sup>18</sup>O-labeled LNT at *m/z* 1038.3767.

| Exp. <i>m/z</i><br>(Da/e) | Relative<br>Intensity<br>(%) | charge<br>state ( <i>z</i> ) | Theo.<br>Mass | Error<br>(ppm) | Fragment<br>Types             | Loss or<br>Gain | number of<br>metal adducts |
|---------------------------|------------------------------|------------------------------|---------------|----------------|-------------------------------|-----------------|----------------------------|
| 205.9340                  | 0.01                         | 1                            | 205.9339      | 0.70           | <sup>0,4</sup> A <sub>1</sub> | -H              | +1Cs                       |
| 205.9340                  | 0.01                         | 1                            | 205.9339      | 0.70           | <sup>0,4</sup> A <sub>2</sub> | -H              | +1Cs                       |
| 205.9340                  | 0.01                         | 1                            | 205.9339      | 0.70           | <sup>0,4</sup> A <sub>3</sub> | -H              | +1Cs                       |
| 205.9340                  | 0.01                         | 1                            | 205.9339      | 0.70           | <sup>0,4</sup> A <sub>4</sub> | -H              | +1Cs                       |
| 278.9994                  | 0.02                         | 1                            | 278.9992      | 0.66           | <sup>2,5</sup> A <sub>1</sub> |                 | +1Cs                       |
| 321.0101                  | 0.02                         | 1                            | 321.0098      | 1.05           | <sup>1,5</sup> A <sub>1</sub> | -2H             | +1Cs                       |
| 322.0182                  | 0.01                         | 1                            | 322.0176      | 1.85           | <sup>1,5</sup> A <sub>1</sub> | -H              | +1Cs                       |
| 323.0257                  | 0.07                         | 1                            | 323.0254      | 0.85           | <sup>1,5</sup> A <sub>1</sub> |                 | +1Cs                       |
| 351.0205                  | 0.02                         | 1                            | 351.0203      | 0.48           | B <sub>1</sub>                |                 | +1Cs                       |
| 352.0283                  | 0.01                         | 1                            | 352.0282      | 0.35           | B <sub>1</sub>                | H               | +1Cs                       |
| 353.0249                  | 0.34                         | 1                            | 353.0246      | 0.91           | Z <sub>1</sub>                |                 | +1Cs                       |
| 367.0163                  | 0.13                         | 1                            | 367.0153      | 2.87           | C <sub>1</sub>                | -2H             | +1Cs                       |
| 368.0234                  | 0.04                         | 1                            | 368.0231      | 0.91           | C <sub>1</sub>                | -H              | +1Cs                       |
| 369.0312                  | 0.13                         | 1                            | 369.0309      | 0.79           | C <sub>1</sub>                |                 | +1Cs                       |
| 399.0304                  | 0.14                         | 1                            | 399.0301      | 0.84           | <sup>1,5</sup> X <sub>1</sub> |                 | +1Cs                       |
| 464.2494                  | 0.08                         | 1                            | 464.2490      | 0.76           | B <sub>2</sub>                | H               | 0                          |
| 466.0839                  | 0.07                         | 1                            | 466.0836      | 0.52           | <sup>1,3</sup> A <sub>2</sub> |                 | +1Cs                       |
| 481.0836                  | 0.02                         | 1                            | 481.0833      | 0.57           | <sup>2,5</sup> A <sub>2</sub> | -2H             | +1Cs                       |
| 485.1148                  | 0.01                         | 1                            | 485.1146      | 0.38           | <sup>2,5</sup> A <sub>2</sub> | 2H              | +1Cs                       |
| 508.0945                  | 0.02                         | 1                            | 508.0942      | 0.60           | <sup>1,4</sup> A <sub>2</sub> | -2H             | +1Cs                       |
| 557.1250                  | 1.52                         | 1                            | 557.1244      | 1.15           | Z <sub>2</sub>                |                 | +1Cs                       |
| 566.1376                  | 0.03                         | 1                            | 566.1361      | 2.64           | <sup>1,5</sup> A <sub>2</sub> | -2H             | +1Cs                       |
| 568.1519                  | 0.05                         | 1                            | 568.1517      | 0.32           | <sup>1,5</sup> A <sub>2</sub> |                 | +1Cs                       |
| 573.1199                  | 0.48                         | 1                            | 573.1193      | 1.06           | Y <sub>2</sub>                | -2H             | +1Cs                       |
| 575.1352                  | 0.24                         | 1                            | 575.1349      | 0.48           | Y <sub>2</sub>                |                 | +1Cs                       |
| 596.1469                  | 0.17                         | 1                            | 596.1467      | 0.41           | B <sub>2</sub>                |                 | +1Cs                       |
| 597.1548                  | 0.10                         | 1                            | 597.1545      | 0.49           | B <sub>2</sub>                | H               | +1Cs                       |
| 603.1299                  | 1.62                         | 1                            | 603.1298      | 0.10           | <sup>1,5</sup> X <sub>2</sub> |                 | +1Cs                       |
| 612.1417                  | 2.21                         | 1                            | 612.1416      | 0.25           | C <sub>2</sub>                | -2H             | +1Cs                       |
| 613.1521                  | 0.06                         | 1                            | 613.1494      | 4.40           | C <sub>2</sub>                | -H              | +1Cs                       |
| 670.1833                  | 0.17                         | 1                            | 670.1834      | -0.18          | <sup>1,3</sup> A <sub>3</sub> |                 | +1Cs                       |
| 670.1833                  | 0.17                         | 1                            | 670.1834      | -0.18          | <sup>2,4</sup> A <sub>3</sub> |                 | +1Cs                       |

**Supporting Information for EED of Glycans**

|          |      |   |          |       |                               |     |      |
|----------|------|---|----------|-------|-------------------------------|-----|------|
| 670.3529 | 0.05 | 1 | 670.3530 | -0.20 | Z <sub>3</sub>                | H   | 0    |
| 686.1682 | 0.02 | 1 | 686.1670 | 1.82  | <sup>2,5</sup> X <sub>2</sub> | -2H | +1Cs |
| 687.1745 | 0.03 | 1 | 687.1748 | -0.42 | <sup>2,5</sup> X <sub>2</sub> | -H  | +1Cs |
| 726.2096 | 0.02 | 1 | 726.2096 | -0.04 | <sup>2,5</sup> A <sub>3</sub> | -2H | +1Cs |
| 729.2305 | 0.07 | 1 | 729.2331 | -3.54 | <sup>2,5</sup> A <sub>3</sub> | H   | +1Cs |
| 746.2237 | 0.22 | 1 | 746.2245 | -1.06 | <sup>2,4</sup> X <sub>2</sub> |     | +1Cs |
| 770.2353 | 0.46 | 1 | 770.2358 | -0.75 | <sup>1,5</sup> A <sub>3</sub> | -2H | +1Cs |
| 800.2436 | 0.02 | 1 | 800.2465 | -3.58 | B <sub>3</sub>                |     | +1Cs |
| 802.2506 | 0.86 | 1 | 802.2507 | -0.08 | Z <sub>3</sub>                |     | +1Cs |
| 816.2407 | 1.92 | 1 | 816.2413 | -0.79 | C <sub>3</sub>                | -2H | +1Cs |
| 818.2461 | 0.52 | 1 | 818.2456 | 0.63  | Y <sub>3</sub>                | -2H | +1Cs |
| 848.2531 | 0.90 | 1 | 848.2562 | -3.60 | <sup>1,5</sup> X <sub>3</sub> |     | +1Cs |
| 874.2821 | 0.04 | 1 | 874.2832 | -1.26 | <sup>2,4</sup> A <sub>4</sub> |     | +1Cs |
| 876.2865 | 0.04 | 1 | 876.2875 | -1.11 | <sup>0,2</sup> X <sub>3</sub> |     | +1Cs |
| 888.2980 | 0.54 | 1 | 888.2989 | -1.03 | <sup>3,5</sup> A <sub>4</sub> |     | +1Cs |
| 904.2828 | 0.02 | 1 | 904.2823 | 0.44  | <sup>1,4</sup> X <sub>3</sub> | -2H | +1Cs |
| 906.2969 | 0.03 | 1 | 906.2980 | -1.28 | <sup>1,4</sup> X <sub>3</sub> |     | +1Cs |
| 920.3127 | 0.03 | 1 | 920.3137 | -1.06 | <sup>0,3</sup> X <sub>3</sub> |     | +1Cs |
| 920.3127 | 0.03 | 1 | 920.3137 | -1.06 | <sup>0,3</sup> X <sub>2</sub> |     | +1Cs |
| 920.3127 | 0.03 | 1 | 920.3137 | -1.06 | <sup>0,3</sup> X <sub>1</sub> |     | +1Cs |
| 930.3084 | 0.02 | 1 | 930.3094 | -1.08 | <sup>2,5</sup> A <sub>4</sub> | -2H | +1Cs |
| 962.3242 | 0.55 | 1 | 962.3242 | -0.03 | <sup>0,4</sup> X <sub>3</sub> | -2H | +1Cs |
| 962.3242 | 0.55 | 1 | 962.3242 | -0.03 | <sup>0,4</sup> X <sub>2</sub> | -2H | +1Cs |
| 962.3242 | 0.55 | 1 | 962.3242 | -0.03 | <sup>0,4</sup> X <sub>1</sub> | -2H | +1Cs |
| 962.3242 | 0.55 | 1 | 962.3242 | -0.03 | <sup>0,4</sup> X <sub>0</sub> | -2H | +1Cs |
| 964.3387 | 0.31 | 1 | 964.3399 | -1.27 | <sup>0,4</sup> X <sub>3</sub> |     | +1Cs |
| 964.3387 | 0.31 | 1 | 964.3399 | -1.27 | <sup>0,4</sup> X <sub>2</sub> |     | +1Cs |
| 964.3387 | 0.31 | 1 | 964.3399 | -1.27 | <sup>0,4</sup> X <sub>1</sub> |     | +1Cs |
| 964.3387 | 0.31 | 1 | 964.3399 | -1.27 | <sup>0,4</sup> X <sub>0</sub> |     | +1Cs |
| 974.3338 | 0.25 | 1 | 974.3357 | -1.91 | <sup>1,5</sup> A <sub>4</sub> | -2H | +1Cs |
| 976.3515 | 0.42 | 1 | 976.3513 | 0.19  | <sup>1,5</sup> A <sub>4</sub> |     | +1Cs |

**Supporting Information for EED of Glycans**

**Table S11.** List of ECD fragment ions of the doubly lithiated, permethylated, <sup>18</sup>O-labeled LNnT at *m/z* 459.7513.

| Exp. <i>m/z</i><br>(Da/e) | Relative<br>Intensity<br>(%) | charge<br>state ( <i>z</i> ) | Theo.<br>Mass | Error<br>(ppm) | Fragment<br>Types             | Loss or<br>Gain | number of<br>metal adducts |
|---------------------------|------------------------------|------------------------------|---------------|----------------|-------------------------------|-----------------|----------------------------|
| 249.1496                  | 0.18                         | 1                            | 249.1496      | -0.11          | C <sub>1</sub>                | -H              | +2Li                       |
| 251.1538                  | 0.34                         | 1                            | 251.1539      | -0.29          | Y <sub>1</sub>                | -H              | +2Li                       |
| 279.1487                  | 1.05                         | 1                            | 279.1488      | -0.26          | <sup>1,5</sup> X <sub>1</sub> | -H              | +2Li                       |
| 307.1801                  | 0.10                         | 1                            | 307.1801      | 0.06           | <sup>0,2</sup> X <sub>1</sub> | -H              | +2Li                       |
| 317.1760                  | 0.23                         | 1                            | 317.1758      | 0.52           | <sup>3,5</sup> A <sub>2</sub> | -3H             | +2Li                       |
| 321.1600                  | 0.05                         | 1                            | 321.1594      | 2.04           | <sup>2,5</sup> X <sub>1</sub> | -3H             | +2Li                       |
| 351.2003                  | 0.16                         | 1                            | 351.2013      | -2.99          | <sup>2,5</sup> A <sub>2</sub> | H               | 0                          |
| 361.2021                  | 0.12                         | 1                            | 361.2021      | 0.12           | <sup>2,5</sup> A <sub>2</sub> | -3H             | +2Li                       |
| 363.2177                  | 0.15                         | 1                            | 363.2177      | 0.05           | <sup>2,5</sup> A <sub>2</sub> | -H              | +2Li                       |
| 381.2169                  | 0.13                         | 1                            | 381.2169      | 0.05           | <sup>1,3</sup> X <sub>1</sub> | -H              | +2Li                       |
| 381.2169                  | 0.13                         | 1                            | 381.2169      | 0.05           | <sup>2,4</sup> X <sub>1</sub> | -H              | +2Li                       |
| 388.2130                  | 0.76                         | 1                            | 388.2130      | 0.19           | <sup>1,4</sup> A <sub>2</sub> | -3H             | +2Li                       |
| 431.2349                  | 1.60                         | 1                            | 431.2349      | -0.03          | Z <sub>2</sub>                |                 | +1Li                       |
| 447.2308                  | 0.07                         | 1                            | 447.2298      | 2.21           | Y <sub>2</sub>                | -2H             | +1Li                       |
| 448.2376                  | 0.71                         | 1                            | 448.2376      | -0.07          | Y <sub>2</sub>                | -H              | +1Li                       |
| 450.2298                  | 0.04                         | 2                            | 900.4598      | -0.26          | C <sub>4</sub>                | -3H             | +2Li                       |
| 450.2862                  | 0.25                         | 1                            | 450.2861      | 0.19           | <sup>1,5</sup> A <sub>2</sub> | H               | +2Li                       |
| 451.2364                  | 0.03                         | 2                            | 902.4755      | -2.99          | C <sub>4</sub>                | -H              | +2Li                       |
| 453.2381                  | 2.00                         | 1                            | 453.2380      | 0.23           | Y <sub>2</sub>                | -3H             | +2Li                       |
| 455.2536                  | 6.72                         | 1                            | 455.2536      | -0.09          | Y <sub>2</sub>                | -H              | +2Li                       |
| 464.2491                  | 0.28                         | 1                            | 464.2490      | 0.17           | B <sub>2</sub>                | H               | 0                          |
| 470.2572                  | 0.09                         | 1                            | 470.2572      | -0.03          | B <sub>2</sub>                |                 | +1Li                       |
| 478.2811                  | 4.99                         | 1                            | 478.2810      | 0.12           | B <sub>2</sub>                | H               | +2Li                       |
| 494.2759                  | 0.11                         | 1                            | 494.2759      | -0.08          | C <sub>2</sub>                | -H              | +2Li                       |
| 545.3035                  | 0.06                         | 1                            | 545.3018      | 3.20           | <sup>1,3</sup> A <sub>3</sub> | H               | +1Li                       |
| 545.3035                  | 0.06                         | 1                            | 545.3018      | 3.20           | <sup>2,4</sup> A <sub>3</sub> | H               | +1Li                       |
| 554.3203                  | 0.03                         | 1                            | 554.3221      | -3.15          | <sup>0,2</sup> X <sub>2</sub> | H               | +2Li                       |
| 644.3466                  | 0.04                         | 1                            | 644.3464      | 0.30           | <sup>1,5</sup> A <sub>3</sub> | -2H             | +1Li                       |
| 678.3766                  | 0.03                         | 1                            | 678.3769      | -0.41          | Z <sub>3</sub>                | 2H              | +1Li                       |
| 682.3810                  | 0.05                         | 1                            | 682.3809      | 0.22           | B <sub>3</sub>                | H               | +2Li                       |
| 684.3860                  | 0.17                         | 1                            | 684.3851      | 1.37           | Z <sub>3</sub>                | H               | +2Li                       |
| 698.3759                  | 0.33                         | 1                            | 698.3757      | 0.25           | C <sub>3</sub>                | -H              | +2Li                       |
| 700.3801                  | 0.83                         | 1                            | 700.3799      | 0.25           | Y <sub>3</sub>                | -H              | +2Li                       |

**Supporting Information for EED of Glycans**

|          |      |   |          |       |                               |    |      |
|----------|------|---|----------|-------|-------------------------------|----|------|
| 779.4136 | 0.33 | 1 | 779.4121 | 1.85  | <sup>0,3</sup> A <sub>4</sub> | H  | +1Li |
| 779.4136 | 0.33 | 1 | 779.4157 | -2.71 | <sup>1,3</sup> X <sub>2</sub> | 3H | 0    |
| 782.4219 | 0.03 | 1 | 782.4243 | -3.01 | <sup>1,4</sup> X <sub>3</sub> | 2H | +1Li |
| 826.4496 | 0.05 | 1 | 826.4504 | -1.01 | <sup>1,3</sup> X <sub>3</sub> | 2H | +1Li |
| 826.4496 | 0.05 | 1 | 826.4504 | -1.01 | <sup>1,3</sup> X <sub>0</sub> | 2H | +1Li |
| 826.4496 | 0.05 | 1 | 826.4504 | -1.01 | <sup>2,4</sup> X <sub>3</sub> | 2H | +1Li |
| 896.4673 | 1.37 | 1 | 896.4673 | -0.01 | C <sub>4</sub>                |    | +1Li |

**Supporting Information for EED of Glycans**

**Table S12.** List of EED fragment ions of the doubly lithiated, permethylated, <sup>18</sup>O-labeled LNnT at *m/z* 459.7513.

| Exp. <i>m/z</i><br>(Da/e) | Relative<br>Intensity<br>(%) | charge<br>state (z) | Theo.<br>Mass | Error<br>(ppm) | Fragment<br>Types             | Loss or<br>Gain | number of<br>metal adducts |
|---------------------------|------------------------------|---------------------|---------------|----------------|-------------------------------|-----------------|----------------------------|
| 195.1202                  | 0.27                         | 1                   | 195.1203      | -0.64          | <sup>1,5</sup> A <sub>1</sub> | -2H             | +1Li                       |
| 225.1309                  | 0.33                         | 1                   | 225.1309      | 0.08           | B <sub>1</sub>                |                 | +1Li                       |
| 227.1351                  | 0.46                         | 1                   | 227.1351      | -0.12          | Z <sub>1</sub>                |                 | +1Li                       |
| 241.1258                  | 0.48                         | 1                   | 241.1258      | -0.01          | C <sub>1</sub>                | -2H             | +1Li                       |
| 243.1415                  | 0.85                         | 1                   | 243.1414      | 0.20           | C <sub>1</sub>                |                 | +1Li                       |
| 245.1457                  | 0.39                         | 1                   | 245.1457      | 0.08           | Y <sub>1</sub>                |                 | +1Li                       |
| 249.1496                  | 1.24                         | 1                   | 249.1496      | -0.11          | C <sub>1</sub>                | -H              | +2Li                       |
| 273.1406                  | 1.78                         | 1                   | 273.1406      | -0.04          | <sup>1,5</sup> X <sub>1</sub> |                 | +1Li                       |
| 301.1719                  | 0.33                         | 1                   | 301.1719      | -0.04          | <sup>0,2</sup> X <sub>1</sub> |                 | +1Li                       |
| 307.1801                  | 0.18                         | 1                   | 307.1801      | 0.06           | <sup>0,2</sup> X <sub>1</sub> | -H              | +2Li                       |
| 313.1834                  | 1.87                         | 1                   | 313.1833      | 0.35           | <sup>3,5</sup> A <sub>2</sub> |                 | +1Li                       |
| 325.6809                  | 0.12                         | 2                   | 651.3624      | -0.94          | <sup>1,5</sup> A <sub>3</sub> | -2H             | +2Li                       |
| 326.6887                  | 0.09                         | 2                   | 653.3781      | -1.06          | <sup>1,5</sup> A <sub>3</sub> |                 | +2Li                       |
| 340.6862                  | 0.04                         | 2                   | 681.3730      | -0.93          | B <sub>3</sub>                |                 | +2Li                       |
| 341.6883                  | 0.14                         | 2                   | 683.3772      | -0.93          | Z <sub>3</sub>                |                 | +2Li                       |
| 349.6916                  | 0.13                         | 2                   | 699.3835      | -0.56          | C <sub>3</sub>                |                 | +2Li                       |
| 364.6912                  | 0.48                         | 2                   | 729.3827      | -0.45          | <sup>1,5</sup> X <sub>3</sub> |                 | +2Li                       |
| 377.7046                  | 0.08                         | 2                   | 755.4097      | -0.76          | <sup>2,4</sup> A <sub>4</sub> |                 | +2Li                       |
| 378.7068                  | 0.10                         | 2                   | 757.4140      | -0.60          | <sup>0,2</sup> X <sub>3</sub> |                 | +2Li                       |
| 384.7124                  | 0.77                         | 2                   | 769.4254      | -0.82          | <sup>3,5</sup> A <sub>4</sub> |                 | +2Li                       |
| 421.7256                  | 0.55                         | 2                   | 843.4508      | 0.44           | <sup>0,4</sup> X <sub>3</sub> | -2H             | +2Li                       |
| 421.7256                  | 0.55                         | 2                   | 843.4508      | 0.44           | <sup>0,4</sup> X <sub>2</sub> | -2H             | +2Li                       |
| 421.7256                  | 0.55                         | 2                   | 843.4508      | 0.44           | <sup>0,4</sup> X <sub>1</sub> | -2H             | +2Li                       |
| 421.7256                  | 0.55                         | 2                   | 843.4508      | 0.44           | <sup>0,4</sup> X <sub>0</sub> | -2H             | +2Li                       |
| 422.7329                  | 0.48                         | 2                   | 845.4664      | -0.75          | <sup>0,4</sup> X <sub>3</sub> |                 | +2Li                       |
| 422.7329                  | 0.48                         | 2                   | 845.4664      | -0.75          | <sup>0,4</sup> X <sub>2</sub> |                 | +2Li                       |
| 422.7329                  | 0.48                         | 2                   | 845.4664      | -0.75          | <sup>0,4</sup> X <sub>1</sub> |                 | +2Li                       |
| 422.7329                  | 0.48                         | 2                   | 845.4664      | -0.75          | <sup>0,4</sup> X <sub>0</sub> |                 | +2Li                       |
| 427.7309                  | 0.53                         | 2                   | 855.4622      | -0.50          | <sup>1,5</sup> A <sub>4</sub> | -2H             | +2Li                       |
| 428.7388                  | 1.31                         | 2                   | 857.4778      | -0.31          | <sup>1,5</sup> A <sub>4</sub> |                 | +2Li                       |
| 431.2351                  | 1.31                         | 1                   | 431.2349      | 0.47           | Z <sub>2</sub>                |                 | +1Li                       |
| 442.2624                  | 0.86                         | 1                   | 442.2623      | 0.25           | <sup>1,5</sup> A <sub>2</sub> |                 | +1Li                       |
| 447.2299                  | 1.22                         | 1                   | 447.2298      | 0.17           | Y <sub>2</sub>                | -2H             | +1Li                       |



**Supporting Information for EED of Glycans**

|          |      |   |          |       |                               |     |      |
|----------|------|---|----------|-------|-------------------------------|-----|------|
| 449.2455 | 6.91 | 1 | 449.2455 | 0.11  | Y <sub>2</sub>                |     | +1Li |
| 455.2536 | 6.82 | 1 | 455.2536 | -0.09 | Y <sub>2</sub>                | -H  | +2Li |
| 464.2492 | 1.05 | 1 | 464.2490 | 0.37  | B <sub>2</sub>                | H   | 0    |
| 470.2573 | 5.66 | 1 | 470.2572 | 0.17  | B <sub>2</sub>                |     | +1Li |
| 477.2406 | 4.79 | 1 | 477.2404 | 0.49  | <sup>1,5</sup> X <sub>2</sub> |     | +1Li |
| 478.2811 | 0.16 | 1 | 478.2810 | 0.12  | B <sub>2</sub>                | H   | +2Li |
| 486.2522 | 1.57 | 1 | 486.2521 | 0.15  | C <sub>2</sub>                | -2H | +1Li |
| 488.2678 | 0.16 | 1 | 488.2678 | 0.04  | C <sub>2</sub>                |     | +1Li |
| 533.2667 | 0.11 | 1 | 533.2666 | 0.25  | <sup>1,4</sup> X <sub>2</sub> | -2H | +1Li |
| 543.2871 | 0.06 | 1 | 543.2861 | 1.80  | <sup>1,3</sup> A <sub>3</sub> | -H  | +1Li |
| 543.2871 | 0.06 | 1 | 543.2861 | 1.80  | <sup>2,4</sup> A <sub>3</sub> | -H  | +1Li |
| 544.2941 | 0.26 | 1 | 544.2939 | 0.31  | <sup>1,3</sup> A <sub>3</sub> |     | +1Li |
| 544.2941 | 0.26 | 1 | 544.2939 | 0.31  | <sup>2,4</sup> A <sub>3</sub> |     | +1Li |
| 546.2983 | 0.14 | 1 | 546.2982 | 0.09  | <sup>0,2</sup> X <sub>2</sub> |     | +1Li |
| 588.3203 | 0.04 | 1 | 588.3202 | 0.19  | <sup>1,4</sup> A <sub>3</sub> |     | +1Li |
| 590.3246 | 0.16 | 1 | 590.3244 | 0.29  | <sup>0,3</sup> X <sub>2</sub> |     | +1Li |
| 600.3201 | 0.06 | 1 | 600.3202 | -0.08 | <sup>2,5</sup> A <sub>3</sub> | -2H | +1Li |
| 612.3203 | 0.04 | 1 | 612.3226 | -3.71 | <sup>0,2</sup> A <sub>3</sub> | H   | 0    |
| 614.3253 | 0.05 | 1 | 614.3268 | -2.50 | <sup>2,4</sup> X <sub>2</sub> | H   | 0    |
| 644.3466 | 0.75 | 1 | 644.3464 | 0.30  | <sup>1,5</sup> A <sub>3</sub> | -2H | +1Li |
| 676.3613 | 1.85 | 1 | 676.3612 | 0.16  | Z <sub>3</sub>                |     | +1Li |
| 690.3520 | 0.86 | 1 | 690.3519 | 0.11  | C <sub>3</sub>                | -2H | +1Li |
| 692.3571 | 0.40 | 1 | 692.3561 | 1.43  | Y <sub>3</sub>                | -2H | +1Li |
| 694.3721 | 0.11 | 1 | 694.3718 | 0.42  | Y <sub>3</sub>                |     | +1Li |
| 698.3759 | 0.15 | 1 | 698.3757 | 0.25  | C <sub>3</sub>                | -H  | +2Li |
| 700.3805 | 0.11 | 1 | 700.3799 | 0.77  | Y <sub>3</sub>                | -H  | +2Li |
| 722.3670 | 1.21 | 1 | 722.3667 | 0.41  | <sup>1,5</sup> X <sub>3</sub> |     | +1Li |
| 728.3750 | 0.07 | 1 | 728.3749 | 0.15  | <sup>1,5</sup> X <sub>3</sub> | -H  | +2Li |
| 747.3882 | 0.04 | 1 | 747.3859 | 3.02  | <sup>2,4</sup> A <sub>4</sub> | -H  | +1Li |
| 750.3978 | 0.05 | 1 | 750.3980 | -0.26 | <sup>0,2</sup> X <sub>3</sub> |     | +1Li |
| 762.4092 | 0.03 | 1 | 762.4094 | -0.34 | <sup>3,5</sup> A <sub>4</sub> |     | +1Li |
| 777.3973 | 0.04 | 1 | 777.3965 | 1.02  | <sup>0,3</sup> A <sub>4</sub> | -H  | +1Li |
| 777.3973 | 0.04 | 1 | 777.4000 | -3.55 | <sup>1,3</sup> X <sub>2</sub> | H   | 0    |
| 779.4142 | 0.02 | 1 | 779.4121 | 2.63  | <sup>0,3</sup> A <sub>4</sub> | H   | +1Li |
| 838.4506 | 0.17 | 1 | 838.4504 | 0.20  | <sup>0,4</sup> X <sub>3</sub> |     | +1Li |
| 838.4506 | 0.17 | 1 | 838.4504 | 0.20  | <sup>0,4</sup> X <sub>2</sub> |     | +1Li |
| 838.4506 | 0.17 | 1 | 838.4504 | 0.20  | <sup>0,4</sup> X <sub>1</sub> |     | +1Li |
| 838.4506 | 0.17 | 1 | 838.4504 | 0.20  | <sup>0,4</sup> X <sub>0</sub> |     | +1Li |
| 896.4685 | 0.26 | 1 | 896.4673 | 1.35  | C <sub>4</sub>                |     | +1Li |

**Supporting Information for EED of Glycans**

**Table S13.** List of EED fragment ions of the singly lithiated, permethylated, <sup>18</sup>O-labeled LNnT at *m/z* 912.4872.

| Exp. <i>m/z</i><br>(Da/e) | Relative<br>Intensity<br>(%) | charge<br>state ( <i>z</i> ) | Theo.<br>Mass | Error<br>(ppm) | Fragment<br>Types             | Loss or<br>Gain | number of<br>metal adducts |
|---------------------------|------------------------------|------------------------------|---------------|----------------|-------------------------------|-----------------|----------------------------|
| 225.1309                  | 0.06                         | 1                            | 225.1309      | 0.08           | B <sub>1</sub>                |                 | +1Li                       |
| 227.1351                  | 0.08                         | 1                            | 227.1351      | -0.12          | Z <sub>1</sub>                |                 | +1Li                       |
| 243.1415                  | 0.23                         | 1                            | 243.1414      | 0.20           | C <sub>1</sub>                |                 | +1Li                       |
| 245.1457                  | 0.11                         | 1                            | 245.1457      | 0.08           | Y <sub>1</sub>                |                 | +1Li                       |
| 273.1408                  | 0.25                         | 1                            | 273.1406      | 0.74           | <sup>1,5</sup> X <sub>1</sub> |                 | +1Li                       |
| 299.1678                  | 0.08                         | 1                            | 299.1676      | 0.47           | <sup>2,4</sup> A <sub>2</sub> |                 | +1Li                       |
| 313.1835                  | 0.26                         | 1                            | 313.1833      | 0.64           | <sup>3,5</sup> A <sub>2</sub> |                 | +1Li                       |
| 382.2051                  | 0.05                         | 1                            | 382.2048      | 0.91           | <sup>1,4</sup> A <sub>2</sub> | -2H             | +1Li                       |
| 430.2285                  | 0.03                         | 1                            | 430.2271      | 3.26           | Z <sub>2</sub>                | -H              | +1Li                       |
| 431.2352                  | 1.07                         | 1                            | 431.2349      | 0.68           | Z <sub>2</sub>                |                 | +1Li                       |
| 440.2478                  | 0.07                         | 1                            | 440.2466      | 2.66           | <sup>1,5</sup> A <sub>2</sub> | -2H             | +1Li                       |
| 442.2627                  | 0.59                         | 1                            | 442.2623      | 0.94           | <sup>1,5</sup> A <sub>2</sub> |                 | +1Li                       |
| 447.2301                  | 1.18                         | 1                            | 447.2298      | 0.64           | Y <sub>2</sub>                | -2H             | +1Li                       |
| 449.2458                  | 7.60                         | 1                            | 449.2455      | 0.72           | Y <sub>2</sub>                |                 | +1Li                       |
| 464.2493                  | 0.08                         | 1                            | 464.2490      | 0.56           | B <sub>2</sub>                | H               | 0                          |
| 470.2575                  | 2.58                         | 1                            | 470.2572      | 0.62           | B <sub>2</sub>                |                 | +1Li                       |
| 477.2407                  | 1.87                         | 1                            | 477.2404      | 0.68           | <sup>1,5</sup> X <sub>2</sub> |                 | +1Li                       |
| 486.2523                  | 1.31                         | 1                            | 486.2521      | 0.34           | C <sub>2</sub>                | -2H             | +1Li                       |
| 487.2605                  | 0.31                         | 1                            | 487.2599      | 1.13           | C <sub>2</sub>                | -H              | +1Li                       |
| 488.2682                  | 0.09                         | 1                            | 488.2678      | 0.85           | C <sub>2</sub>                |                 | +1Li                       |
| 544.2942                  | 0.19                         | 1                            | 544.2939      | 0.43           | <sup>1,3</sup> A <sub>3</sub> |                 | +1Li                       |
| 544.2942                  | 0.19                         | 1                            | 544.2939      | 0.43           | <sup>2,4</sup> A <sub>3</sub> |                 | +1Li                       |
| 546.2985                  | 0.05                         | 1                            | 546.2982      | 0.54           | <sup>0,2</sup> X <sub>2</sub> |                 | +1Li                       |
| 590.3245                  | 0.07                         | 1                            | 590.3244      | 0.19           | <sup>0,3</sup> X <sub>2</sub> |                 | +1Li                       |
| 600.3206                  | 0.02                         | 1                            | 600.3202      | 0.73           | <sup>2,5</sup> A <sub>3</sub> | -2H             | +1Li                       |
| 614.3252                  | 0.03                         | 1                            | 614.3268      | -2.70          | <sup>2,4</sup> X <sub>2</sub> | H               | 0                          |
| 644.3465                  | 0.65                         | 1                            | 644.3464      | 0.12           | <sup>1,5</sup> A <sub>3</sub> | -2H             | +1Li                       |
| 645.3562                  | 0.06                         | 1                            | 645.3542      | 3.03           | <sup>1,5</sup> A <sub>3</sub> | -H              | +1Li                       |
| 676.3616                  | 1.66                         | 1                            | 676.3612      | 0.52           | Z <sub>3</sub>                |                 | +1Li                       |
| 678.3787                  | 0.03                         | 1                            | 678.3769      | 2.73           | Z <sub>3</sub>                | 2H              | +1Li                       |
| 690.3518                  | 0.83                         | 1                            | 690.3519      | -0.16          | C <sub>3</sub>                | -2H             | +1Li                       |
| 692.3569                  | 0.11                         | 1                            | 692.3561      | 1.08           | Y <sub>3</sub>                | -2H             | +1Li                       |

**Supporting Information for EED of Glycans**

|          |      |   |          |       |                               |     |      |
|----------|------|---|----------|-------|-------------------------------|-----|------|
| 722.3667 | 1.38 | 1 | 722.3667 | -0.02 | <sup>1,5</sup> X <sub>3</sub> |     | +1Li |
| 750.3981 | 0.04 | 1 | 750.3980 | 0.07  | <sup>0,2</sup> X <sub>3</sub> |     | +1Li |
| 762.4094 | 0.45 | 1 | 762.4094 | -0.02 | <sup>3,5</sup> A <sub>4</sub> |     | +1Li |
| 804.4198 | 0.02 | 1 | 804.4200 | -0.21 | <sup>2,5</sup> A <sub>4</sub> | -2H | +1Li |
| 836.4353 | 0.50 | 1 | 836.4348 | 0.60  | <sup>0,4</sup> X <sub>3</sub> | -2H | +1Li |
| 836.4353 | 0.50 | 1 | 836.4348 | 0.60  | <sup>0,4</sup> X <sub>2</sub> | -2H | +1Li |
| 836.4353 | 0.50 | 1 | 836.4348 | 0.60  | <sup>0,4</sup> X <sub>1</sub> | -2H | +1Li |
| 836.4353 | 0.50 | 1 | 836.4348 | 0.60  | <sup>0,4</sup> X <sub>0</sub> | -2H | +1Li |
| 838.4501 | 0.43 | 1 | 838.4504 | -0.45 | <sup>0,4</sup> X <sub>3</sub> |     | +1Li |
| 838.4501 | 0.43 | 1 | 838.4504 | -0.45 | <sup>0,4</sup> X <sub>2</sub> |     | +1Li |
| 838.4501 | 0.43 | 1 | 838.4504 | -0.45 | <sup>0,4</sup> X <sub>1</sub> |     | +1Li |
| 838.4501 | 0.43 | 1 | 838.4504 | -0.45 | <sup>0,4</sup> X <sub>0</sub> |     | +1Li |
| 848.4468 | 0.21 | 1 | 848.4462 | 0.66  | <sup>1,5</sup> A <sub>4</sub> | -2H | +1Li |
| 850.4614 | 0.70 | 1 | 850.4619 | -0.52 | <sup>1,5</sup> A <sub>4</sub> |     | +1Li |

**Supporting Information for EED of Glycans**

**Table S14.** List of EED fragment ions of the singly cesiated, permethylated, <sup>18</sup>O-labeled LNnT at *m/z* 1038.3767.

| Exp. <i>m/z</i><br>(Da/e) | Relative<br>Intensity<br>(%) | charge<br>state (z) | Theo.<br>Mass | Error<br>(ppm) | Fragment<br>Types             | Loss or<br>Gain | number of<br>metal adducts |
|---------------------------|------------------------------|---------------------|---------------|----------------|-------------------------------|-----------------|----------------------------|
| 262.9919                  | 0.02                         | 1                   | 262.9917      | 0.75           | <sup>1,3</sup> A <sub>2</sub> | H               | +1Cs                       |
| 292.9785                  | 0.03                         | 1                   | 292.9785      | 0.10           | <sup>0,2</sup> A <sub>1</sub> | -2H             | +1Cs                       |
| 351.0206                  | 0.02                         | 1                   | 351.0203      | 0.74           | B <sub>1</sub>                |                 | +1Cs                       |
| 353.0247                  | 0.24                         | 1                   | 353.0246      | 0.30           | Z <sub>1</sub>                |                 | +1Cs                       |
| 367.0153                  | 0.27                         | 1                   | 367.0153      | 0.12           | C <sub>1</sub>                | -2H             | +1Cs                       |
| 369.0310                  | 0.35                         | 1                   | 369.0309      | 0.29           | C <sub>1</sub>                |                 | +1Cs                       |
| 399.0302                  | 0.09                         | 1                   | 399.0301      | 0.38           | <sup>1,5</sup> X <sub>1</sub> |                 | +1Cs                       |
| 438.0649                  | 0.01                         | 1                   | 438.0649      | -0.03          | <sup>3,5</sup> A <sub>2</sub> | -H              | +1Cs                       |
| 439.0729                  | 0.08                         | 1                   | 439.0728      | 0.35           | <sup>3,5</sup> A <sub>2</sub> |                 | +1Cs                       |
| 464.2491                  | 0.09                         | 1                   | 464.2490      | 0.17           | B <sub>2</sub>                | H               | 0                          |
| 557.1244                  | 1.52                         | 1                   | 557.1244      | 0.05           | Z <sub>2</sub>                |                 | +1Cs                       |
| 566.1366                  | 0.05                         | 1                   | 566.1361      | 0.92           | <sup>1,5</sup> A <sub>2</sub> | -2H             | +1Cs                       |
| 568.1517                  | 0.14                         | 1                   | 568.1517      | -0.11          | <sup>1,5</sup> A <sub>2</sub> |                 | +1Cs                       |
| 573.1197                  | 0.92                         | 1                   | 573.1193      | 0.75           | Y <sub>2</sub>                | -2H             | +1Cs                       |
| 575.1350                  | 0.08                         | 1                   | 575.1349      | 0.16           | Y <sub>2</sub>                |                 | +1Cs                       |
| 596.1468                  | 0.18                         | 1                   | 596.1467      | 0.20           | B <sub>2</sub>                |                 | +1Cs                       |
| 597.1548                  | 0.05                         | 1                   | 597.1545      | 0.49           | B <sub>2</sub>                | H               | +1Cs                       |
| 603.1298                  | 1.09                         | 1                   | 603.1298      | 0.00           | <sup>1,5</sup> X <sub>2</sub> |                 | +1Cs                       |
| 612.1415                  | 2.27                         | 1                   | 612.1416      | -0.15          | C <sub>2</sub>                | -2H             | +1Cs                       |
| 613.1520                  | 0.06                         | 1                   | 613.1494      | 4.21           | C <sub>2</sub>                | -H              | +1Cs                       |
| 670.1834                  | 0.15                         | 1                   | 670.1834      | 0.00           | <sup>1,3</sup> A <sub>3</sub> |                 | +1Cs                       |
| 670.1834                  | 0.15                         | 1                   | 670.1834      | 0.00           | <sup>2,4</sup> A <sub>3</sub> |                 | +1Cs                       |
| 687.1753                  | 0.04                         | 1                   | 687.1748      | 0.73           | <sup>2,5</sup> X <sub>2</sub> | -H              | +1Cs                       |
| 716.2138                  | 0.09                         | 1                   | 716.2139      | -0.09          | <sup>0,3</sup> X <sub>2</sub> |                 | +1Cs                       |
| 746.2248                  | 0.03                         | 1                   | 746.2245      | 0.41           | <sup>2,4</sup> X <sub>2</sub> |                 | +1Cs                       |
| 770.2358                  | 0.43                         | 1                   | 770.2358      | -0.12          | <sup>1,5</sup> A <sub>3</sub> | -2H             | +1Cs                       |
| 802.2505                  | 1.98                         | 1                   | 802.2507      | -0.23          | Z <sub>3</sub>                |                 | +1Cs                       |
| 816.2412                  | 1.85                         | 1                   | 816.2413      | -0.19          | C <sub>3</sub>                | -2H             | +1Cs                       |
| 818.2466                  | 0.08                         | 1                   | 818.2456      | 1.23           | Y <sub>3</sub>                | -2H             | +1Cs                       |
| 848.2560                  | 1.28                         | 1                   | 848.2562      | -0.22          | <sup>1,5</sup> X <sub>3</sub> |                 | +1Cs                       |
| 874.2831                  | 0.04                         | 1                   | 874.2832      | -0.14          | <sup>2,4</sup> A <sub>4</sub> |                 | +1Cs                       |
| 876.2875                  | 0.04                         | 1                   | 876.2875      | 0.00           | <sup>0,2</sup> X <sub>3</sub> |                 | +1Cs                       |
| 887.2917                  | 0.08                         | 1                   | 887.2911      | 0.71           | <sup>3,5</sup> A <sub>4</sub> | -H              | +1Cs                       |

**Supporting Information for EED of Glycans**

|          |      |   |          |       |                               |     |      |
|----------|------|---|----------|-------|-------------------------------|-----|------|
| 888.2989 | 0.49 | 1 | 888.2989 | 0.00  | <sup>3,5</sup> A <sub>4</sub> |     | +1Cs |
| 904.2831 | 0.02 | 1 | 904.2823 | 0.78  | <sup>1,4</sup> X <sub>3</sub> | -2H | +1Cs |
| 962.3251 | 0.30 | 1 | 962.3242 | 0.86  | <sup>0,4</sup> X <sub>3</sub> | -2H | +1Cs |
| 962.3251 | 0.30 | 1 | 962.3242 | 0.86  | <sup>0,4</sup> X <sub>2</sub> | -2H | +1Cs |
| 962.3251 | 0.30 | 1 | 962.3242 | 0.86  | <sup>0,4</sup> X <sub>1</sub> | -2H | +1Cs |
| 962.3251 | 0.30 | 1 | 962.3242 | 0.86  | <sup>0,4</sup> X <sub>0</sub> | -2H | +1Cs |
| 964.3399 | 0.88 | 1 | 964.3399 | 0.00  | <sup>0,4</sup> X <sub>3</sub> |     | +1Cs |
| 964.3399 | 0.88 | 1 | 964.3399 | 0.00  | <sup>0,4</sup> X <sub>2</sub> |     | +1Cs |
| 964.3399 | 0.88 | 1 | 964.3399 | 0.00  | <sup>0,4</sup> X <sub>1</sub> |     | +1Cs |
| 964.3399 | 0.88 | 1 | 964.3399 | 0.00  | <sup>0,4</sup> X <sub>0</sub> |     | +1Cs |
| 974.3354 | 0.23 | 1 | 974.3357 | -0.28 | <sup>1,5</sup> A <sub>4</sub> | -2H | +1Cs |
| 976.3526 | 0.33 | 1 | 976.3513 | 1.31  | <sup>1,5</sup> A <sub>4</sub> |     | +1Cs |

**Supporting Information for EED of Glycans**

**Table S15.** List of EED fragment ions of the singly lithiated, permethylated, and <sup>18</sup>O-Labeled Sialyl Lewis X at *m/z* 1039.5505.

| Exp. <i>m/z</i><br>(Da/e) | Relative<br>Intensity<br>(%) | charge<br>state ( <i>z</i> ) | Theo.<br>Mass | Error<br>(ppm) | Fragment<br>Types              | Loss or<br>Gain  | number of<br>metal adducts |
|---------------------------|------------------------------|------------------------------|---------------|----------------|--------------------------------|------------------|----------------------------|
| 211.1149                  | 0.51                         | 1                            | 211.1152      | -1.60          | C <sub>1β</sub>                | -2H              | +1Li                       |
| 213.1305                  | 0.37                         | 1                            | 213.1309      | -1.85          | C <sub>1β</sub>                |                  | +1Li                       |
| 236.1466                  | 0.08                         | 1                            | 236.1469      | -1.11          | <sup>3,5</sup> A <sub>1α</sub> | -2H              | +1Li                       |
| 238.1621                  | 0.07                         | 1                            | 238.1625      | -1.78          | <sup>3,5</sup> A <sub>1α</sub> |                  | +1Li                       |
| 252.1415                  | 0.04                         | 1                            | 252.1418      | -1.10          | <sup>0,3</sup> A <sub>1α</sub> | -2H              | +1Li                       |
| 280.1727                  | 0.04                         | 1                            | 280.1731      | -1.37          | <sup>2,5</sup> A <sub>1α</sub> | -2H              | +1Li                       |
| 308.1678                  | 0.10                         | 1                            | 308.1680      | -0.65          | <sup>1,3</sup> A <sub>3</sub>  | -2H              | +1Li                       |
| 310.1836                  | 0.08                         | 1                            | 310.1836      | -0.14          | <sup>1,3</sup> A <sub>3</sub>  |                  | +1Li                       |
| 340.1941                  | 6.38                         | 1                            | 340.1942      | -0.33          | <sup>1,3</sup> A <sub>3</sub>  | OCH <sub>2</sub> | +1Li                       |
| 376.1966                  | 0.08                         | 1                            | 376.1966      | -0.03          | B <sub>1α</sub>                | H                | 0                          |
| 382.2048                  | 0.53                         | 1                            | 382.2048      | 0.05           | B <sub>1α</sub>                |                  | +1Li                       |
| 383.2126                  | 0.29                         | 1                            | 383.2126      | -0.06          | B <sub>1α</sub>                | H                | +1Li                       |
| 400.2151                  | 0.12                         | 1                            | 400.2153      | -0.64          | C <sub>1α</sub>                |                  | +1Li                       |
| 400.2153                  | 0.13                         | 1                            | 400.2153      | -0.11          | C <sub>1α</sub>                |                  | +1Li                       |
| 442.2509                  | 0.89                         | 1                            | 442.2509      | -0.03          | Z <sub>1α</sub>                |                  | +1Li                       |
| 454.2259                  | 0.04                         | 1                            | 454.2259      | -0.04          | <sup>1,3</sup> A <sub>2α</sub> | -2H              | +1Li                       |
| 454.2259                  | 0.04                         | 1                            | 454.2259      | -0.04          | <sup>2,4</sup> A <sub>2α</sub> | -2H              | +1Li                       |
| 456.2416                  | 0.48                         | 1                            | 456.2415      | 0.11           | <sup>1,3</sup> A <sub>2α</sub> |                  | +1Li                       |
| 456.2416                  | 0.48                         | 1                            | 456.2415      | 0.11           | <sup>2,4</sup> A <sub>2α</sub> |                  | +1Li                       |
| 458.2459                  | 1.43                         | 1                            | 458.2458      | 0.23           | Y <sub>1α</sub>                | -2H              | +1Li                       |
| 460.2614                  | 0.07                         | 1                            | 460.2614      | -0.09          | Y <sub>1α</sub>                |                  | +1Li                       |
| 488.2564                  | 1.32                         | 1                            | 488.2563      | 0.10           | <sup>1,5</sup> X <sub>1α</sub> |                  | +1Li                       |
| 498.2522                  | 0.04                         | 1                            | 498.2521      | 0.15           | <sup>1,4</sup> A <sub>2α</sub> | -2H              | +1Li                       |
| 500.2662                  | 0.04                         | 1                            | 500.2678      | -3.13          | <sup>1,4</sup> A <sub>2α</sub> |                  | +1Li                       |
| 512.2678                  | 0.12                         | 1                            | 512.2678      | 0.09           | <sup>2,5</sup> A <sub>2α</sub> | -2H              | +1Li                       |
| 514.2831                  | 0.05                         | 1                            | 514.2834      | -0.68          | <sup>2,5</sup> A <sub>2α</sub> |                  | +1Li                       |
| 514.2834                  | 0.05                         | 1                            | 514.2834      | -0.08          | <sup>2,5</sup> A <sub>2α</sub> |                  | +1Li                       |
| 516.2875                  | 0.06                         | 1                            | 516.2877      | -0.38          | <sup>0,2</sup> X <sub>1α</sub> |                  | +1Li                       |
| 528.2629                  | 0.06                         | 1                            | 528.2627      | 0.37           | <sup>0,2</sup> A <sub>2α</sub> | -2H              | +1Li                       |
| 530.2785                  | 0.03                         | 1                            | 530.2783      | 0.32           | <sup>0,2</sup> A <sub>2α</sub> |                  | +1Li                       |
| 556.2943                  | 0.30                         | 1                            | 556.2940      | 0.57           | <sup>1,5</sup> A <sub>2α</sub> | -2H              | +1Li                       |
| 556.2949                  | 0.35                         | 1                            | 556.2940      | 1.67           | <sup>1,5</sup> A <sub>2α</sub> | -2H              | +1Li                       |

**Supporting Information for EED of Glycans**

|           |      |   |           |       |                        |                                 |      |
|-----------|------|---|-----------|-------|------------------------|---------------------------------|------|
| 558.3097  | 0.18 | 1 | 558.3096  | 0.09  | $^{1,5}A_{2\alpha}$    |                                 | +1Li |
| 586.3047  | 0.05 | 1 | 586.3046  | 0.19  | $B_{2\alpha}$          |                                 | +1Li |
| 588.3201  | 0.05 | 1 | 588.3203  | -0.17 | $B_{2\alpha}$          | 2H                              | +1Li |
| 602.2994  | 1.55 | 1 | 602.2995  | -0.18 | $C_{2\alpha}$          | -2H                             | +1Li |
| 604.3151  | 0.25 | 1 | 604.3151  | -0.02 | $C_{2\alpha}$          |                                 | +1Li |
| 616.3403  | 1.60 | 1 | 616.3401  | 0.29  | $Z_{2\alpha}$          | -OCH <sub>2</sub>               | +1Li |
| 646.3507  | 0.72 | 1 | 646.3506  | 0.08  | $Z_{2\alpha}$          |                                 | +1Li |
| 662.3461  | 1.04 | 1 | 662.3456  | 0.85  | $Y_{2\alpha}$          | -2H                             | +1Li |
| 664.3612  | 3.43 | 1 | 664.3612  | -0.02 | $Y_{2\alpha}$          |                                 | +1Li |
| 674.3571  | 0.16 | 1 | 674.3570  | 0.16  | $^{3,5}A_3$            |                                 | +1Li |
| 734.3666  | 0.14 | 1 | 734.3667  | -0.15 | $^{1,3}X_0$            | -2H                             | +1Li |
| 748.3827  | 0.42 | 1 | 748.3823  | 0.47  | $^{0,2}X_{2\alpha}$    |                                 | +1Li |
| 750.3616  | 0.28 | 1 | 750.3616  | -0.10 | $^{1,5}X_{2\alpha}$    |                                 | +1Li |
| 806.3880  | 0.02 | 1 | 806.3879  | 0.17  | $^{3,5}X_{2\alpha}$    | -2H                             | +1Li |
| 833.4352  | 0.68 | 1 | 833.4351  | 0.06  | $Z_{1\beta}$           |                                 | +1Li |
| 851.4455  | 0.06 | 1 | 851.4457  | -0.23 | $Y_{1\beta}$           |                                 | +1Li |
| 877.4607  | 0.10 | 1 | 877.4613  | -0.71 | $^{0,4}X_{2\alpha}$    |                                 | +1Li |
| 879.4410  | 0.41 | 1 | 879.4406  | 0.40  | $^{1,5}X_{1\beta}$     |                                 | +1Li |
| 907.4715  | 0.06 | 1 | 907.4719  | -0.42 | $^{0,2}X_{1\beta}$     |                                 | +1Li |
| 907.4715  | 0.06 | 1 | 907.4719  | -0.42 | $^{1,4}X_{1\beta}$     |                                 | +1Li |
| 919.4715  | 0.04 | 1 | 919.4719  | -0.45 | $^{0,3}X_{1\alpha}$    | -2H                             | +1Li |
| 923.4664  | 0.04 | 1 | 923.4668  | -0.48 | $^{2,5}X_{1\beta}$     |                                 | +1Li |
| 935.4673  | 0.26 | 1 | 935.4669  | 0.47  | $^{3,5}X_{1\alpha}$    | -2H                             | +1Li |
| 936.4752  | 0.09 | 1 | 936.4747  | 0.59  | $^{3,5}X_{1\alpha}$    | -H                              | +1Li |
| 961.4863  | 0.02 | 1 | 961.4849  | 1.51  | $^{3,5}X_{1\beta}$     | H                               | 0    |
| 963.4983  | 0.51 | 1 | 963.4981  | 0.20  | $^{0,4}X_{1\alpha}$    | -2H                             | +1Li |
| 963.4983  | 0.51 | 1 | 963.4981  | 0.20  | $^{0,4}X_0$            | -2H                             | +1Li |
| 965.5131  | 3.17 | 1 | 965.5137  | -0.64 | $^{0,4}X_{1\alpha}$    |                                 | +1Li |
| 965.5131  | 3.17 | 1 | 965.5137  | -0.64 | $^{0,4}X_0$            |                                 | +1Li |
| 979.4938  | 0.18 | 1 | 979.4930  | 0.76  | $^{1,3}X_{2\alpha}$    | -2H                             | +1Li |
| 981.5079  | 0.74 | 1 | 981.5087  | -0.82 | $^{1,3}X_{2\alpha}$    |                                 | +1Li |
| 993.5091  | 0.35 | 1 | 993.5087  | 0.44  | $^{0,4}X_{1\beta}$     | -2H                             | +1Li |
| 995.5245  | 0.38 | 1 | 995.5243  | 0.17  | $^{0,4}X_{1\beta}$     |                                 | +1Li |
| 1007.5229 | 1.47 | 1 | 1007.5232 | -0.27 | $^{0,3}X_{1\beta}/C_3$ | NOC <sub>3</sub> H <sub>6</sub> | +1Li |

**Supporting Information for EED of Glycans**

**Table S16.** List of EED fragment ions of the singly lithiated, permethylated, and <sup>18</sup>O-Labeled Sialyl Lewis A at *m/z* 1039.5505.

| Exp. <i>m/z</i><br>(Da/e) | Relative<br>Intensity<br>(%) | charge<br>state (z) | Theo.<br>Mass | Error<br>(ppm) | Fragment<br>Types                                | Loss or<br>Gain | number of<br>metal adducts |
|---------------------------|------------------------------|---------------------|---------------|----------------|--------------------------------------------------|-----------------|----------------------------|
| 211.1154                  | 0.09                         | 1                   | 211.1152      | 0.79           | C <sub>1β</sub>                                  | -2H             | +1Li                       |
| 213.1309                  | 0.05                         | 1                   | 213.1309      | 0.09           | C <sub>1β</sub>                                  |                 | +1Li                       |
| 238.1628                  | 0.06                         | 1                   | 238.1625      | 1.17           | <sup>3,5</sup> A <sub>1α</sub>                   |                 | +1Li                       |
| 283.1729                  | 0.03                         | 1                   | 283.1727      | 0.60           | <sup>3,5</sup> A <sub>3</sub>                    |                 | +1Li                       |
| 340.1945                  | 2.08                         | 1                   | 340.1942      | 0.81           | <sup>1,3</sup> X <sub>2α</sub> /B <sub>2α</sub>  | CH <sub>4</sub> | +1Li                       |
| 376.1970                  | 0.10                         | 1                   | 376.1966      | 1.02           | B <sub>1α</sub>                                  | H               | 0                          |
| 382.2051                  | 0.93                         | 1                   | 382.2048      | 0.85           | B <sub>1α</sub>                                  |                 | +1Li                       |
| 383.2129                  | 0.29                         | 1                   | 383.2126      | 0.73           | B <sub>1α</sub>                                  | H               | +1Li                       |
| 400.2154                  | 0.13                         | 1                   | 400.2153      | 0.12           | C <sub>1α</sub>                                  |                 | +1Li                       |
| 400.2157                  | 0.14                         | 1                   | 400.2153      | 0.89           | C <sub>1α</sub>                                  |                 | +1Li                       |
| 436.2429                  | 0.13                         | 1                   | 436.2427      | 0.39           | Z <sub>1α</sub>                                  | H               | 0                          |
| 442.2512                  | 1.40                         | 1                   | 442.2509      | 0.66           | Z <sub>1α</sub>                                  |                 | +1Li                       |
| 454.2263                  | 0.04                         | 1                   | 454.2259      | 0.84           | <sup>1,3</sup> A <sub>2α</sub>                   | -2H             | +1Li                       |
| 454.2263                  | 0.04                         | 1                   | 454.2259      | 0.84           | <sup>2,4</sup> A <sub>2α</sub>                   | -2H             | +1Li                       |
| 456.2418                  | 0.22                         | 1                   | 456.2415      | 0.51           | <sup>1,3</sup> A <sub>2α</sub>                   |                 | +1Li                       |
| 456.2418                  | 0.22                         | 1                   | 456.2415      | 0.51           | <sup>2,4</sup> A <sub>2α</sub>                   |                 | +1Li                       |
| 458.2461                  | 0.15                         | 1                   | 458.2458      | 0.63           | Y <sub>1α</sub>                                  | -2H             | +1Li                       |
| 460.2618                  | 0.11                         | 1                   | 460.2614      | 0.77           | Y <sub>1α</sub>                                  |                 | +1Li                       |
| 488.2566                  | 0.83                         | 1                   | 488.2563      | 0.48           | <sup>1,5</sup> X <sub>1α</sub>                   |                 | +1Li                       |
| 498.2521                  | 0.06                         | 1                   | 498.2521      | -0.03          | <sup>1,4</sup> A <sub>2α</sub>                   | -2H             | +1Li                       |
| 502.2835                  | 0.07                         | 1                   | 502.2834      | 0.17           | <sup>1,4</sup> A <sub>2α</sub>                   | 2H              | +1Li                       |
| 512.2682                  | 0.08                         | 1                   | 512.2678      | 0.80           | <sup>2,5</sup> A <sub>2α</sub>                   | -2H             | +1Li                       |
| 514.2835                  | 0.08                         | 1                   | 514.2834      | 0.15           | <sup>2,5</sup> A <sub>2α</sub>                   |                 | +1Li                       |
| 516.2879                  | 0.04                         | 1                   | 516.2877      | 0.45           | <sup>0,2</sup> X <sub>1α</sub>                   |                 | +1Li                       |
| 528.2634                  | 0.12                         | 1                   | 528.2627      | 1.41           | <sup>0,2</sup> A <sub>2α</sub>                   | -2H             | +1Li                       |
| 530.2785                  | 0.12                         | 1                   | 530.2783      | 0.32           | <sup>0,2</sup> A <sub>2α</sub>                   |                 | +1Li                       |
| 546.2979                  | 0.08                         | 1                   | 546.2982      | -0.58          | <sup>1,4</sup> X <sub>1α</sub>                   |                 | +1Li                       |
| 556.2938                  | 0.18                         | 1                   | 556.2940      | -0.31          | <sup>1,5</sup> A <sub>2α</sub>                   | -2H             | +1Li                       |
| 586.3042                  | 0.06                         | 1                   | 586.3046      | -0.64          | B <sub>2α</sub>                                  |                 | +1Li                       |
| 602.2994                  | 4.90                         | 1                   | 602.2995      | -0.18          | C <sub>2α</sub>                                  | -2H             | +1Li                       |
| 604.3150                  | 0.80                         | 1                   | 604.3151      | -0.22          | C <sub>2α</sub>                                  |                 | +1Li                       |
| 616.3400                  | 0.90                         | 1                   | 616.3401      | -0.16          | Z <sub>2α</sub> / <sup>0,4</sup> X <sub>1β</sub> | CH <sub>2</sub> | +1Li                       |



**Supporting Information for EED of Glycans**

|          |      |   |          |       |                                |     |      |
|----------|------|---|----------|-------|--------------------------------|-----|------|
| 646.3504 | 0.74 | 1 | 646.3506 | -0.40 | Z <sub>2α</sub>                |     | +1Li |
| 662.3459 | 1.12 | 1 | 662.3456 | 0.48  | Y <sub>2α</sub>                | -2H | +1Li |
| 664.3611 | 5.28 | 1 | 664.3612 | -0.20 | Y <sub>2α</sub>                |     | +1Li |
| 701.3682 | 0.03 | 1 | 701.3679 | 0.51  | <sup>1,3</sup> A <sub>3</sub>  |     | +1Li |
| 748.3827 | 0.80 | 1 | 748.3823 | 0.47  | <sup>0,2</sup> X <sub>2α</sub> |     | +1Li |
| 750.3612 | 0.16 | 1 | 750.3616 | -0.59 | <sup>1,5</sup> X <sub>2α</sub> |     | +1Li |
| 833.4347 | 0.56 | 1 | 833.4351 | -0.53 | Z <sub>1β</sub>                |     | +1Li |
| 849.4290 | 0.07 | 1 | 849.4301 | -1.21 | Y <sub>1β</sub>                | -2H | +1Li |
| 851.4444 | 0.07 | 1 | 851.4457 | -1.52 | Y <sub>1β</sub>                |     | +1Li |
| 877.4607 | 0.28 | 1 | 877.4613 | -0.71 | <sup>0,4</sup> X <sub>2α</sub> |     | +1Li |
| 879.4393 | 0.68 | 1 | 879.4406 | -1.54 | <sup>1,5</sup> X <sub>1β</sub> |     | +1Li |
| 907.4709 | 0.06 | 1 | 907.4719 | -1.09 | <sup>0,2</sup> X <sub>1β</sub> |     | +1Li |
| 907.4709 | 0.06 | 1 | 907.4719 | -1.09 | <sup>1,4</sup> X <sub>1β</sub> |     | +1Li |
| 935.4658 | 0.21 | 1 | 935.4669 | -1.09 | <sup>3,5</sup> X <sub>1α</sub> | -2H | +1Li |
| 935.4656 | 0.21 | 1 | 935.4669 | -1.36 | <sup>3,5</sup> X <sub>1α</sub> | -2H | +1Li |
| 995.5232 | 0.24 | 1 | 995.5243 | -1.12 | <sup>0,4</sup> X <sub>1β</sub> |     | +1Li |
| 963.4971 | 0.32 | 1 | 963.4981 | -1.06 | <sup>0,4</sup> X <sub>1α</sub> | -2H | +1Li |
| 963.4971 | 0.32 | 1 | 963.4981 | -1.06 | <sup>0,4</sup> X <sub>0</sub>  | -2H | +1Li |
| 965.5125 | 3.41 | 1 | 965.5137 | -1.28 | <sup>0,4</sup> X <sub>1α</sub> |     | +1Li |
| 965.5125 | 3.41 | 1 | 965.5137 | -1.28 | <sup>0,4</sup> X <sub>0</sub>  |     | +1Li |
| 979.4927 | 0.10 | 1 | 979.4930 | -0.36 | <sup>1,3</sup> X <sub>2α</sub> | -2H | +1Li |
| 981.5071 | 0.27 | 1 | 981.5087 | -1.63 | <sup>1,3</sup> X <sub>2α</sub> |     | +1Li |
| 993.5083 | 0.39 | 1 | 993.5087 | -0.36 | <sup>0,4</sup> X <sub>1β</sub> | -2H | +1Li |
| 996.5299 | 0.20 | 1 | 996.5321 | -2.23 | <sup>0,4</sup> X <sub>1β</sub> | H   | +1Li |

**Supporting Information for EED of Glycans**

**Table S17.** List of EED fragment ions of the singly lithiated, permethylated, (Man)<sub>5</sub>(GlcNAc)<sub>2</sub> at *m/z* 1563.8808.

| Exp. <i>m/z</i><br>(Da/e) | Relative<br>Intensity<br>(%) | charge<br>state ( <i>z</i> ) | Theo.<br>Mass | Error<br>(ppm) | Fragment<br>Types                | Loss or<br>Gain | number of<br>metal adducts |
|---------------------------|------------------------------|------------------------------|---------------|----------------|----------------------------------|-----------------|----------------------------|
| 511.2839                  | 0.18                         | 1                            | 511.2838      | 0.28           | Z <sub>2</sub>                   |                 | +1Li                       |
| 557.2892                  | 0.40                         | 1                            | 557.2892      | -0.13          | <sup>1,5</sup> X <sub>2</sub>    |                 | +1Li                       |
| 649.3261                  | 0.35                         | 1                            | 649.3254      | 1.15           | C <sub>2α</sub>                  | -2H             | +1Li                       |
| 721.3830                  | 0.27                         | 1                            | 721.3829      | 0.15           | <sup>3,5</sup> A <sub>3</sub>    |                 | +1Li                       |
| 877.4734                  | 0.06                         | 1                            | 877.4727      | 0.75           | <sup>0,4</sup> X <sub>2</sub>    |                 | +1Li                       |
| 919.4834                  | 0.26                         | 1                            | 919.4833      | 0.12           | Z <sub>3α</sub>                  |                 | +1Li                       |
| 935.4790                  | 0.13                         | 1                            | 935.4782      | 0.86           | Y <sub>3α</sub>                  | -2H             | +1Li                       |
| 965.4889                  | 0.82                         | 1                            | 965.4888      | 0.11           | <sup>1,5</sup> X <sub>3α</sub>   |                 | +1Li                       |
| 1011.5204                 | 0.18                         | 1                            | 1011.5194     | 0.98           | <sup>1,5</sup> A <sub>3</sub>    | -2H             | +1Li                       |
| 1013.5353                 | 0.39                         | 1                            | 1013.5350     | 0.23           | <sup>1,5</sup> A <sub>3</sub>    |                 | +1Li                       |
| 1057.5247                 | 7.37                         | 1                            | 1057.5249     | -0.22          | C <sub>3</sub>                   | -2H             | +1Li                       |
| 1059.5440                 | 0.57                         | 1                            | 1059.5405     | 3.21           | C <sub>3</sub>                   |                 | +1Li                       |
| 1129.5825                 | 0.21                         | 1                            | 1129.5824     | 0.10           | <sup>3,5</sup> A <sub>4</sub>    |                 | +1Li                       |
| 1225.6111                 | 0.08                         | 1                            | 1225.6147     | -2.98          | <sup>1,4</sup> X <sub>2</sub>    | -2H             | +1Li                       |
| 1225.6111                 | 0.08                         | 1                            | 1225.6147     | -2.98          | <sup>1,4</sup> X <sub>3α</sub>   | -2H             | +1Li                       |
| 1258.6613                 | 0.20                         | 1                            | 1258.6614     | -0.11          | <sup>1,5</sup> A <sub>4</sub>    |                 | +1Li                       |
| 1283.6578                 | 0.62                         | 1                            | 1283.6566     | 0.96           | <sup>0,4</sup> X <sub>3α</sub>   | -2H             | +1Li                       |
| 1286.6846                 | 0.06                         | 1                            | 1286.6801     | 3.49           | <sup>0,4</sup> X <sub>3α</sub>   | H               | +1Li                       |
| 1302.6519                 | 2.15                         | 1                            | 1302.6512     | 0.48           | C <sub>4</sub>                   | -2H             | +1Li                       |
| 1305.6699                 | 0.10                         | 1                            | 1305.6747     | -3.67          | C <sub>4</sub>                   | H               | +1Li                       |
| 1327.6828                 | 1.32                         | 1                            | 1327.6829     | -0.10          | Z <sub>3β</sub>                  |                 | +1Li                       |
| 1327.6828                 | 1.32                         | 1                            | 1327.6829     | -0.10          | Z <sub>4α'</sub>                 |                 | +1Li                       |
| 1327.6828                 | 1.32                         | 1                            | 1327.6829     | -0.10          | Z <sub>4α''</sub>                |                 | +1Li                       |
| 1343.6781                 | 1.06                         | 1                            | 1343.6777     | 0.28           | Y <sub>3β</sub>                  | -2H             | +1Li                       |
| 1343.6781                 | 1.06                         | 1                            | 1343.6777     | 0.28           | Y <sub>4α'</sub>                 | -2H             | +1Li                       |
| 1343.6781                 | 1.06                         | 1                            | 1343.6777     | 0.28           | Y <sub>4α''</sub>                | -2H             | +1Li                       |
| 1373.6878                 | 3.31                         | 1                            | 1373.6884     | -0.45          | <sup>1,5</sup> X <sub>3β</sub>   |                 | +1Li                       |
| 1373.6878                 | 3.31                         | 1                            | 1373.6884     | -0.45          | <sup>1,5</sup> X <sub>4α'</sub>  |                 | +1Li                       |
| 1373.6878                 | 3.31                         | 1                            | 1373.6884     | -0.45          | <sup>1,5</sup> X <sub>4α''</sub> |                 | +1Li                       |

**Supporting Information for EED of Glycans**

|           |      |   |           |       |                       |     |      |
|-----------|------|---|-----------|-------|-----------------------|-----|------|
| 1429.7178 | 0.11 | 1 | 1429.7146 | 2.23  | $^{1,4}X_{3\beta}$    | -2H | +1Li |
| 1429.7178 | 0.11 | 1 | 1429.7146 | 2.23  | $^{1,4}X_{4\alpha'}$  | -2H | +1Li |
| 1429.7178 | 0.11 | 1 | 1429.7146 | 2.23  | $^{1,4}X_{4\alpha''}$ | -2H | +1Li |
| 1459.7259 | 0.13 | 1 | 1459.7251 | 0.59  | $^{3,5}X_{3\beta}$    | -2H | +1Li |
| 1459.7259 | 0.13 | 1 | 1459.7251 | 0.59  | $^{3,5}X_{4\alpha'}$  | -2H | +1Li |
| 1459.7259 | 0.13 | 1 | 1459.7251 | 0.59  | $^{3,5}X_{4\alpha''}$ | -2H | +1Li |
| 1462.7482 | 0.05 | 1 | 1462.7485 | -0.27 | $^{3,5}X_{3\beta}$    | H   | +1Li |
| 1462.7482 | 0.05 | 1 | 1462.7485 | -0.27 | $^{3,5}X_{4\alpha'}$  | H   | +1Li |
| 1462.7482 | 0.05 | 1 | 1462.7485 | -0.27 | $^{3,5}X_{4\alpha''}$ | H   | +1Li |
| 1473.7420 | 0.10 | 1 | 1473.7407 | 0.84  | $^{1,3}X_{3\beta}$    | -2H | +1Li |
| 1473.7420 | 0.10 | 1 | 1473.7407 | 0.84  | $^{1,3}X_{4\alpha'}$  | -2H | +1Li |
| 1473.7420 | 0.10 | 1 | 1473.7407 | 0.84  | $^{1,3}X_{4\alpha''}$ | -2H | +1Li |
| 1473.7420 | 0.10 | 1 | 1473.7407 | 0.84  | $^{2,4}X_{3\beta}$    | -2H | +1Li |
| 1473.7420 | 0.10 | 1 | 1473.7407 | 0.84  | $^{2,4}X_{4\alpha'}$  | -2H | +1Li |
| 1473.7420 | 0.10 | 1 | 1473.7407 | 0.84  | $^{2,4}X_{4\alpha''}$ | -2H | +1Li |
| 1488.7648 | 0.60 | 1 | 1488.7643 | 0.33  | $^{0,4}X_0$           | -H  | +1Li |
| 1488.7648 | 0.60 | 1 | 1488.7643 | 0.33  | $^{0,4}X_1$           | -H  | +1Li |
| 1488.7648 | 0.60 | 1 | 1488.7643 | 0.33  | $^{0,4}X_{3\beta}$    | -H  | +1Li |
| 1488.7648 | 0.60 | 1 | 1488.7643 | 0.33  | $^{0,4}X_{4\alpha'}$  | -H  | +1Li |
| 1488.7648 | 0.60 | 1 | 1488.7643 | 0.33  | $^{0,4}X_{4\alpha''}$ | -H  | +1Li |
| 1489.7729 | 0.17 | 1 | 1489.7721 | 0.57  | $^{0,4}X_0$           |     | +1Li |
| 1489.7729 | 0.17 | 1 | 1489.7721 | 0.57  | $^{0,4}X_1$           |     | +1Li |
| 1489.7729 | 0.17 | 1 | 1489.7721 | 0.57  | $^{0,4}X_{3\beta}$    |     | +1Li |
| 1489.7729 | 0.17 | 1 | 1489.7721 | 0.57  | $^{0,4}X_{4\alpha'}$  |     | +1Li |
| 1489.7729 | 0.17 | 1 | 1489.7721 | 0.57  | $^{0,4}X_{4\alpha''}$ |     | +1Li |
| 1501.7736 | 0.60 | 1 | 1501.7721 | 0.98  | $^{1,5}A_5$           | -2H | +1Li |
| 1531.7841 | 2.04 | 1 | 1531.7826 | 0.95  | $B_5$                 |     | +1Li |
| 1547.7793 | 0.72 | 1 | 1547.7776 | 1.11  | $C_5$                 | -2H | +1Li |

**Supporting Information for EED of Glycans**

**Table S18.** List of EED fragment ions of the doubly lithiated, permethylated, (Man)<sub>5</sub>(GlcNAc)<sub>2</sub> at *m/z* 785.4121.

| Exp. <i>m/z</i><br>(Da/e) | Relative<br>Intensity<br>(%) | charge<br>state ( <i>z</i> ) | Theo.<br>Mass | Error<br>(ppm) | Fragment<br>Types              | Loss or<br>Gain | number of<br>metal adducts |
|---------------------------|------------------------------|------------------------------|---------------|----------------|--------------------------------|-----------------|----------------------------|
| 243.1414                  | 0.16                         | 1                            | 243.1414      | -0.17          | C <sub>1α'</sub>               |                 | +1Li                       |
| 243.1414                  | 0.16                         | 1                            | 243.1414      | -0.17          | C <sub>1α''</sub>              |                 | +1Li                       |
| 243.1414                  | 0.16                         | 1                            | 243.1414      | -0.17          | C <sub>1β</sub>                |                 | +1Li                       |
| 249.1496                  | 0.89                         | 1                            | 249.1496      | -0.11          | C <sub>1α'</sub>               | -H              | +2Li                       |
| 249.1496                  | 0.89                         | 1                            | 249.1496      | -0.11          | C <sub>1α''</sub>              | -H              | +2Li                       |
| 249.1496                  | 0.89                         | 1                            | 249.1496      | -0.11          | C <sub>1β</sub>                | -H              | +2Li                       |
| 266.1574                  | 0.32                         | 1                            | 266.1574      | -0.04          | Z <sub>1</sub>                 |                 | +1Li                       |
| 284.1680                  | 0.52                         | 1                            | 284.1680      | 0.07           | Y <sub>1</sub>                 |                 | +1Li                       |
| 285.1520                  | 0.33                         | 1                            | 285.1520      | -0.04          | <sup>0,4</sup> A <sub>2α</sub> |                 | +1Li                       |
| 290.1762                  | 0.50                         | 1                            | 290.1761      | 0.17           | Y <sub>1</sub>                 | -H              | +2Li                       |
| 291.1602                  | 0.60                         | 1                            | 291.1602      | -0.04          | <sup>0,4</sup> A <sub>2α</sub> | -H              | +2Li                       |
| 312.1629                  | 0.53                         | 1                            | 312.1629      | -0.04          | <sup>1,5</sup> X <sub>1</sub>  |                 | +1Li                       |
| 313.1833                  | 0.21                         | 1                            | 313.1833      | -0.04          | <sup>3,5</sup> A <sub>2α</sub> |                 | +1Li                       |
| 509.2682                  | 0.04                         | 2                            | 1018.5354     | 0.96           | <sup>1,5</sup> A <sub>3</sub>  | -2H             | +2Li                       |
| 511.2837                  | 0.79                         | 1                            | 511.2838      | -0.14          | Z <sub>2</sub>                 |                 | +1Li                       |
| 513.2994                  | 0.06                         | 1                            | 513.2994      | -0.07          | Z <sub>2</sub>                 | 2H              | +1Li                       |
| 527.2787                  | 0.19                         | 1                            | 527.2787      | 0.03           | Y <sub>2</sub>                 | -2H             | +1Li                       |
| 529.2944                  | 0.23                         | 1                            | 529.2943      | 0.09           | Y <sub>2</sub>                 |                 | +1Li                       |
| 532.2708                  | 0.30                         | 2                            | 1064.5409     | 0.69           | C <sub>3</sub>                 | -2H             | +2Li                       |
| 533.2783                  | 0.16                         | 2                            | 1066.5565     | 0.09           | C <sub>3</sub>                 |                 | +2Li                       |
| 535.3025                  | 0.45                         | 1                            | 535.3025      | -0.02          | Y <sub>2</sub>                 | -H              | +2Li                       |
| 557.2893                  | 0.80                         | 1                            | 557.2892      | 0.09           | <sup>1,5</sup> X <sub>2</sub>  |                 | +1Li                       |
| 559.2935                  | 0.04                         | 1                            | 559.2936      | -0.19          | <sup>2,5</sup> A <sub>2α</sub> | -2H             | +1Li                       |
| 568.2991                  | 0.09                         | 2                            | 1136.5984     | -0.24          | <sup>3,5</sup> A <sub>4</sub>  |                 | +2Li                       |
| 585.3203                  | 0.04                         | 1                            | 585.3205      | -0.33          | <sup>0,2</sup> X <sub>2</sub>  |                 | +1Li                       |
| 603.3206                  | 0.27                         | 1                            | 603.3199      | 1.24           | <sup>1,5</sup> A <sub>2α</sub> | -2H             | +1Li                       |
| 605.3356                  | 0.35                         | 1                            | 605.3355      | 0.08           | <sup>1,5</sup> A <sub>2α</sub> |                 | +1Li                       |
| 611.3170                  | 0.04                         | 2                            | 1222.6300     | 3.27           | <sup>1,4</sup> X <sub>2</sub>  | 2H              | 0                          |

**Supporting Information for EED of Glycans**

|          |      |   |           |       |                       |     |      |
|----------|------|---|-----------|-------|-----------------------|-----|------|
| 611.3170 | 0.04 | 2 | 1222.6300 | 3.27  | $^{1,4}X_{3\alpha}$   | 2H  | 0    |
| 616.3130 | 0.04 | 2 | 1232.6307 | -3.86 | $^{1,4}X_2$           | -2H | +2Li |
| 616.3130 | 0.04 | 2 | 1232.6307 | -3.86 | $^{1,4}X_{3\alpha}$   | -2H | +2Li |
| 632.8385 | 0.28 | 2 | 1265.6774 | -0.31 | $^{1,5}A_4$           |     | +2Li |
| 645.3360 | 0.43 | 2 | 1290.6726 | -0.47 | $^{0,4}X_{3\alpha}$   | -2H | +2Li |
| 646.3431 | 0.19 | 2 | 1292.6882 | -1.62 | $^{0,4}X_{3\alpha}$   |     | +2Li |
| 646.8357 | 0.19 | 2 | 1293.6722 | -0.68 | $B_4$                 |     | +2Li |
| 649.3260 | 0.54 | 1 | 649.3254  | 0.96  | $C_{2\alpha}$         | -2H | +1Li |
| 654.8331 | 1.09 | 2 | 1309.6672 | -0.74 | $C_4$                 | -2H | +2Li |
| 656.3437 | 0.28 | 2 | 1312.6907 | -2.54 | $C_4$                 | H   | +2Li |
| 657.3493 | 0.77 | 1 | 657.3492  | 0.17  | $C_{2\alpha}$         | -H  | +2Li |
| 666.8454 | 0.06 | 2 | 1333.6910 | -0.19 | $Z_{3\beta}$          | -H  | +2Li |
| 666.8454 | 0.06 | 2 | 1333.6910 | -0.19 | $Z_{4\alpha'}$        | -H  | +2Li |
| 666.8454 | 0.06 | 2 | 1333.6910 | -0.19 | $Z_{4\alpha''}$       | -H  | +2Li |
| 667.3492 | 0.90 | 2 | 1334.6989 | -0.38 | $Z_{3\beta}$          |     | +2Li |
| 667.3492 | 0.90 | 2 | 1334.6989 | -0.38 | $Z_{4\alpha'}$        |     | +2Li |
| 667.3492 | 0.90 | 2 | 1334.6989 | -0.38 | $Z_{4\alpha''}$       |     | +2Li |
| 675.3466 | 0.99 | 2 | 1350.6937 | -0.36 | $Y_{3\beta}$          | -2H | +2Li |
| 675.3466 | 0.99 | 2 | 1350.6937 | -0.36 | $Y_{4\alpha'}$        | -2H | +2Li |
| 675.3466 | 0.99 | 2 | 1350.6937 | -0.36 | $Y_{4\alpha''}$       | -2H | +2Li |
| 676.3556 | 0.16 | 2 | 1352.7094 | 1.34  | $Y_{3\beta}$          |     | +2Li |
| 676.3556 | 0.16 | 2 | 1352.7094 | 1.34  | $Y_{4\alpha'}$        |     | +2Li |
| 676.3556 | 0.16 | 2 | 1352.7094 | 1.34  | $Y_{4\alpha''}$       |     | +2Li |
| 683.3443 | 0.10 | 2 | 1366.6849 | 2.69  | $^{3,5}A_5$           | -H  | 0    |
| 689.3450 | 0.09 | 2 | 1378.6887 | 0.89  | $^{1,5}X_{3\beta}$    | -2H | +2Li |
| 689.3450 | 0.09 | 2 | 1378.6887 | 0.89  | $^{1,5}X_{4\alpha'}$  | -2H | +2Li |
| 689.3450 | 0.09 | 2 | 1378.6887 | 0.89  | $^{1,5}X_{4\alpha''}$ | -2H | +2Li |
| 690.3520 | 3.49 | 2 | 1380.7043 | -0.28 | $^{1,5}X_{3\beta}$    |     | +2Li |
| 690.3520 | 3.49 | 2 | 1380.7043 | -0.28 | $^{1,5}X_{4\alpha'}$  |     | +2Li |
| 690.3520 | 3.49 | 2 | 1380.7043 | -0.28 | $^{1,5}X_{4\alpha''}$ |     | +2Li |
| 693.3515 | 0.76 | 1 | 693.3516  | -0.11 | $^{0,4}A_3$           |     | +1Li |
| 699.3599 | 2.57 | 1 | 699.3597  | 0.25  | $^{0,4}A_3$           | -H  | +2Li |
| 704.3677 | 0.11 | 2 | 1408.7356 | -0.19 | $^{0,2}X_{3\beta}$    |     | +2Li |
| 704.3677 | 0.11 | 2 | 1408.7356 | -0.19 | $^{0,2}X_{4\alpha'}$  |     | +2Li |
| 704.3677 | 0.11 | 2 | 1408.7356 | -0.19 | $^{0,2}X_{4\alpha''}$ |     | +2Li |
| 711.3588 | 0.04 | 2 | 1422.7148 | 1.97  | $^{2,5}X_{3\beta}$    | -2H | +2Li |

**Supporting Information for EED of Glycans**

|          |      |   |           |       |                       |     |      |
|----------|------|---|-----------|-------|-----------------------|-----|------|
| 711.3588 | 0.04 | 2 | 1422.7148 | 1.97  | $^{2,5}X_{4\alpha'}$  | -2H | +2Li |
| 711.3588 | 0.04 | 2 | 1422.7148 | 1.97  | $^{2,5}X_{4\alpha''}$ | -2H | +2Li |
| 712.3655 | 0.03 | 2 | 1424.7305 | 0.33  | $^{2,5}X_{3\beta}$    |     | +2Li |
| 712.3655 | 0.03 | 2 | 1424.7305 | 0.33  | $^{2,5}X_{4\alpha'}$  |     | +2Li |
| 712.3655 | 0.03 | 2 | 1424.7305 | 0.33  | $^{2,5}X_{4\alpha''}$ |     | +2Li |
| 718.3653 | 0.11 | 2 | 1436.7306 | 0.00  | $^{1,4}X_{3\beta}$    | -2H | +2Li |
| 718.3653 | 0.11 | 2 | 1436.7306 | 0.00  | $^{1,4}X_{4\alpha'}$  | -2H | +2Li |
| 718.3653 | 0.11 | 2 | 1436.7306 | 0.00  | $^{1,4}X_{4\alpha''}$ | -2H | +2Li |
| 721.3829 | 0.42 | 1 | 721.3829  | -0.02 | $^{3,5}A_3$           |     | +1Li |
| 731.3744 | 0.03 | 2 | 1462.7485 | 0.15  | $^{3,5}X_{3\beta}$    | H   | +1Li |
| 731.3744 | 0.03 | 2 | 1462.7485 | 0.15  | $^{3,5}X_{4\alpha'}$  | H   | +1Li |
| 731.3744 | 0.03 | 2 | 1462.7485 | 0.15  | $^{3,5}X_{4\alpha''}$ | H   | +1Li |
| 733.3720 | 0.08 | 2 | 1466.7411 | 2.00  | $^{3,5}X_{3\beta}$    | -2H | +2Li |
| 733.3720 | 0.08 | 2 | 1466.7411 | 2.00  | $^{3,5}X_{4\alpha'}$  | -2H | +2Li |
| 733.3720 | 0.08 | 2 | 1466.7411 | 2.00  | $^{3,5}X_{4\alpha''}$ | -2H | +2Li |
| 740.3801 | 0.07 | 2 | 1480.7567 | 2.39  | $^{1,3}X_{3\beta}$    | -2H | +2Li |
| 740.3801 | 0.07 | 2 | 1480.7567 | 2.39  | $^{1,3}X_{4\alpha'}$  | -2H | +2Li |
| 740.3801 | 0.07 | 2 | 1480.7567 | 2.39  | $^{1,3}X_{4\alpha''}$ | -2H | +2Li |
| 740.3801 | 0.07 | 2 | 1480.7567 | 2.39  | $^{2,4}X_{3\beta}$    | -2H | +2Li |
| 740.3801 | 0.07 | 2 | 1480.7567 | 2.39  | $^{2,4}X_{4\alpha'}$  | -2H | +2Li |
| 740.3801 | 0.07 | 2 | 1480.7567 | 2.39  | $^{2,4}X_{4\alpha''}$ | -2H | +2Li |
| 742.3924 | 0.05 | 2 | 1484.7880 | -2.17 | $^{1,3}X_{3\beta}$    | 2H  | +2Li |
| 742.3924 | 0.05 | 2 | 1484.7880 | -2.17 | $^{1,3}X_{4\alpha'}$  | 2H  | +2Li |
| 742.3924 | 0.05 | 2 | 1484.7880 | -2.17 | $^{1,3}X_{4\alpha''}$ | 2H  | +2Li |
| 742.3924 | 0.05 | 2 | 1484.7880 | -2.17 | $^{2,4}X_{3\beta}$    | 2H  | +2Li |
| 742.3924 | 0.05 | 2 | 1484.7880 | -2.17 | $^{2,4}X_{4\alpha'}$  | 2H  | +2Li |
| 742.3924 | 0.05 | 2 | 1484.7880 | -2.17 | $^{2,4}X_{4\alpha''}$ | 2H  | +2Li |
| 747.3853 | 0.67 | 2 | 1494.7725 | -1.22 | $^{0,4}X_0$           | -2H | +2Li |
| 747.3853 | 0.67 | 2 | 1494.7725 | -1.22 | $^{0,4}X_1$           | -2H | +2Li |
| 747.3853 | 0.67 | 2 | 1494.7725 | -1.22 | $^{0,4}X_{3\beta}$    | -2H | +2Li |
| 747.3853 | 0.67 | 2 | 1494.7725 | -1.22 | $^{0,4}X_{4\alpha'}$  | -2H | +2Li |
| 747.3853 | 0.67 | 2 | 1494.7725 | -1.22 | $^{0,4}X_{4\alpha''}$ | -2H | +2Li |
| 748.3945 | 0.57 | 2 | 1496.7881 | 0.55  | $^{0,4}X_0$           |     | +2Li |
| 748.3945 | 0.57 | 2 | 1496.7881 | 0.55  | $^{0,4}X_1$           |     | +2Li |
| 748.3945 | 0.57 | 2 | 1496.7881 | 0.55  | $^{0,4}X_{3\beta}$    |     | +2Li |
| 748.3945 | 0.57 | 2 | 1496.7881 | 0.55  | $^{0,4}X_{4\alpha'}$  |     | +2Li |

**Supporting Information for EED of Glycans**

|           |      |   |           |       |                       |     |      |
|-----------|------|---|-----------|-------|-----------------------|-----|------|
| 748.3945  | 0.57 | 2 | 1496.7881 | 0.55  | $^{0,4}X_{4\alpha''}$ |     | +2Li |
| 754.3942  | 0.82 | 2 | 1508.7881 | 0.24  | $^{1,5}A_5$           | -2H | +2Li |
| 768.3908  | 0.08 | 2 | 1536.7830 | -0.87 | $B_5$                 | -2H | +2Li |
| 769.3992  | 2.54 | 2 | 1538.7986 | -0.17 | $B_5$                 |     | +2Li |
| 774.8938  | 0.09 | 2 | 1549.7932 | -3.63 | $C_5$                 |     | +1Li |
| 777.9000  | 0.47 | 2 | 1555.8014 | -0.87 | $C_5$                 | -H  | +2Li |
| 875.4584  | 0.08 | 1 | 875.4571  | 1.48  | $^{0,4}X_2$           | -2H | +1Li |
| 877.4730  | 0.24 | 1 | 877.4727  | 0.33  | $^{0,4}X_2$           |     | +1Li |
| 919.4835  | 0.26 | 1 | 919.4833  | 0.25  | $Z_{3\alpha}$         |     | +1Li |
| 935.4793  | 0.11 | 1 | 935.4782  | 1.19  | $Y_{3\alpha}$         | -2H | +1Li |
| 937.4944  | 0.12 | 1 | 937.4938  | 0.57  | $Y_{3\alpha}$         |     | +1Li |
| 943.5021  | 1.12 | 1 | 943.5020  | 0.05  | $Y_{3\alpha}$         | -H  | +2Li |
| 965.4887  | 0.97 | 1 | 965.4888  | -0.08 | $^{1,5}X_{3\alpha}$   |     | +1Li |
| 993.5194  | 0.06 | 1 | 993.5201  | -0.69 | $^{0,2}X_{3\alpha}$   |     | +1Li |
| 1011.5186 | 0.47 | 1 | 1011.5194 | -0.77 | $^{1,5}A_3$           | -2H | +1Li |
| 1013.5360 | 0.25 | 1 | 1013.5350 | 0.95  | $^{1,5}A_3$           |     | +1Li |
| 1041.5301 | 0.07 | 1 | 1041.5299 | 0.22  | $B_3$                 |     | +1Li |
| 1057.5245 | 4.25 | 1 | 1057.5249 | -0.33 | $C_3$                 | -2H | +1Li |
| 1060.5470 | 0.16 | 1 | 1060.5483 | -1.29 | $C_3$                 | H   | +1Li |
| 1065.5496 | 0.08 | 1 | 1065.5487 | 0.79  | $C_3$                 | -H  | +2Li |
| 1129.5821 | 0.18 | 1 | 1129.5824 | -0.23 | $^{3,5}A_4$           |     | +1Li |
| 1150.5827 | 0.05 | 1 | 1150.5776 | 4.35  | $^{0,3}A_4$           | -2H | +2Li |
| 1194.6096 | 0.05 | 1 | 1194.6039 | 4.80  | $^{0,2}A_4$           | -2H | +2Li |
| 1194.6096 | 0.05 | 1 | 1194.6113 | -1.44 | $^{1,4}A_4$           | H   | 0    |
| 1258.6611 | 0.06 | 1 | 1258.6614 | -0.20 | $^{1,5}A_4$           |     | +1Li |
| 1280.6680 | 0.04 | 1 | 1280.6719 | -3.07 | $^{0,4}X_{3\alpha}$   | 2H  | 0    |
| 1286.6556 | 1.12 | 1 | 1286.6563 | -0.48 | $B_4$                 |     | +1Li |
| 1327.6827 | 0.26 | 1 | 1327.6829 | -0.10 | $Z_{3\beta}$          |     | +1Li |
| 1327.6827 | 0.26 | 1 | 1327.6829 | -0.10 | $Z_{4\alpha'}$        |     | +1Li |
| 1327.6827 | 0.26 | 1 | 1327.6829 | -0.10 | $Z_{4\alpha''}$       |     | +1Li |
| 1333.6925 | 0.07 | 1 | 1333.6910 | 1.09  | $Z_{3\beta}$          | -H  | +2Li |
| 1333.6925 | 0.07 | 1 | 1333.6910 | 1.09  | $Z_{4\alpha'}$        | -H  | +2Li |
| 1333.6925 | 0.07 | 1 | 1333.6910 | 1.09  | $Z_{4\alpha''}$       | -H  | +2Li |
| 1345.6930 | 0.05 | 1 | 1345.6934 | -0.28 | $Y_{3\beta}$          |     | +1Li |
| 1345.6930 | 0.05 | 1 | 1345.6934 | -0.28 | $Y_{4\alpha'}$        |     | +1Li |
| 1345.6930 | 0.05 | 1 | 1345.6934 | -0.28 | $Y_{4\alpha''}$       |     | +1Li |

**Supporting Information for EED of Glycans**

|           |      |   |           |       |                                  |     |      |
|-----------|------|---|-----------|-------|----------------------------------|-----|------|
| 1351.7010 | 2.58 | 1 | 1351.7015 | -0.37 | Y <sub>3β</sub>                  | -H  | +2Li |
| 1351.7010 | 2.58 | 1 | 1351.7015 | -0.37 | Y <sub>4α'</sub>                 | -H  | +2Li |
| 1351.7010 | 2.58 | 1 | 1351.7015 | -0.37 | Y <sub>4α''</sub>                | -H  | +2Li |
| 1373.6859 | 0.14 | 1 | 1373.6884 | -1.79 | <sup>1,5</sup> X <sub>3β</sub>   |     | +1Li |
| 1373.6859 | 0.14 | 1 | 1373.6884 | -1.79 | <sup>1,5</sup> X <sub>4α'</sub>  |     | +1Li |
| 1373.6859 | 0.14 | 1 | 1373.6884 | -1.79 | <sup>1,5</sup> X <sub>4α''</sub> |     | +1Li |
| 1401.7191 | 0.26 | 1 | 1401.7196 | -0.36 | <sup>0,2</sup> X <sub>3β</sub>   |     | +1Li |
| 1401.7191 | 0.26 | 1 | 1401.7196 | -0.36 | <sup>0,2</sup> X <sub>4α'</sub>  |     | +1Li |
| 1401.7191 | 0.26 | 1 | 1401.7196 | -0.36 | <sup>0,2</sup> X <sub>4α''</sub> |     | +1Li |
| 1407.7267 | 0.10 | 1 | 1407.7278 | -0.79 | <sup>0,2</sup> X <sub>3β</sub>   | -H  | +2Li |
| 1407.7267 | 0.10 | 1 | 1407.7278 | -0.79 | <sup>0,2</sup> X <sub>4α'</sub>  | -H  | +2Li |
| 1407.7267 | 0.10 | 1 | 1407.7278 | -0.79 | <sup>0,2</sup> X <sub>4α''</sub> | -H  | +2Li |
| 1417.7104 | 0.10 | 1 | 1417.7145 | -2.85 | <sup>2,5</sup> X <sub>3β</sub>   |     | +1Li |
| 1417.7104 | 0.10 | 1 | 1417.7145 | -2.85 | <sup>2,5</sup> X <sub>4α'</sub>  |     | +1Li |
| 1417.7104 | 0.10 | 1 | 1417.7145 | -2.85 | <sup>2,5</sup> X <sub>4α''</sub> |     | +1Li |
| 1428.7188 | 0.07 | 1 | 1428.7217 | -2.06 | <sup>0,2</sup> A <sub>5</sub>    | H   | 0    |
| 1428.7188 | 0.07 | 1 | 1428.7217 | -2.06 | <sup>1,3</sup> X <sub>0</sub>    | H   | 0    |
| 1428.7188 | 0.07 | 1 | 1428.7217 | -2.06 | <sup>1,3</sup> X <sub>1</sub>    | H   | 0    |
| 1433.7425 | 0.05 | 1 | 1433.7458 | -2.32 | <sup>1,4</sup> X <sub>3β</sub>   | 2H  | +1Li |
| 1433.7425 | 0.05 | 1 | 1433.7458 | -2.32 | <sup>1,4</sup> X <sub>4α'</sub>  | 2H  | +1Li |
| 1433.7425 | 0.05 | 1 | 1433.7458 | -2.32 | <sup>1,4</sup> X <sub>4α''</sub> | 2H  | +1Li |
| 1463.7532 | 0.08 | 1 | 1463.7563 | -2.19 | <sup>3,5</sup> X <sub>3β</sub>   | 2H  | +1Li |
| 1463.7532 | 0.08 | 1 | 1463.7563 | -2.19 | <sup>3,5</sup> X <sub>4α'</sub>  | 2H  | +1Li |
| 1463.7532 | 0.08 | 1 | 1463.7563 | -2.19 | <sup>3,5</sup> X <sub>4α''</sub> | 2H  | +1Li |
| 1495.7809 | 0.18 | 1 | 1495.7803 | 0.40  | <sup>0,4</sup> X <sub>0</sub>    | -H  | +2Li |
| 1495.7809 | 0.18 | 1 | 1495.7803 | 0.40  | <sup>0,4</sup> X <sub>1</sub>    | -H  | +2Li |
| 1495.7809 | 0.18 | 1 | 1495.7803 | 0.40  | <sup>0,4</sup> X <sub>3β</sub>   | -H  | +2Li |
| 1495.7809 | 0.18 | 1 | 1495.7803 | 0.40  | <sup>0,4</sup> X <sub>4α'</sub>  | -H  | +2Li |
| 1495.7809 | 0.18 | 1 | 1495.7803 | 0.40  | <sup>0,4</sup> X <sub>4α''</sub> | -H  | +2Li |
| 1531.7831 | 0.04 | 1 | 1531.7826 | 0.31  | B <sub>5</sub>                   |     | +1Li |
| 1537.7909 | 0.78 | 1 | 1537.7908 | 0.07  | B <sub>5</sub>                   | -H  | +2Li |
| 1539.8024 | 0.05 | 1 | 1539.8064 | -2.64 | B <sub>5</sub>                   | H   | +2Li |
| 1547.7803 | 0.04 | 1 | 1547.7776 | 1.74  | C <sub>5</sub>                   | -2H | +1Li |
| 1549.7945 | 0.10 | 1 | 1549.7932 | 0.86  | C <sub>5</sub>                   |     | +1Li |
| 1555.8009 | 1.13 | 1 | 1555.8014 | -0.32 | C <sub>5</sub>                   | -H  | +2Li |



**Supporting Information for EED of Glycans**

**Table S19.** List of EED fragment ions of the singly cesiated, permethylated, and <sup>18</sup>O-Labeled Sialyl Lewis X at *m/z* 1165.4400.

| Exp. <i>m/z</i><br>(Da/e) | Relative<br>Intensity<br>(%) | charge<br>state (z) | Theo.<br>Mass | Error<br>(ppm) | Fragment<br>Types              | Loss or<br>Gain   | number of<br>metal adducts |
|---------------------------|------------------------------|---------------------|---------------|----------------|--------------------------------|-------------------|----------------------------|
| 337.0047                  | 0.06                         | 1                   | 337.0047      | 0.05           | C <sub>1β</sub>                | -2H               | +1Cs                       |
| 362.0364                  | 0.06                         | 1                   | 362.0363      | 0.25           | <sup>3,5</sup> A <sub>1α</sub> | -2H               | +1Cs                       |
| 376.1965                  | 0.02                         | 1                   | 376.1966      | -0.28          | B <sub>1α</sub>                | H                 | 0                          |
| 436.0731                  | 0.02                         | 1                   | 436.0731      | 0.00           | <sup>1,3</sup> A <sub>3</sub>  |                   | +1Cs                       |
| 466.0837                  | 4.96                         | 1                   | 466.0836      | 0.13           | <sup>1,3</sup> A <sub>3</sub>  | OCH <sub>2</sub>  | +1Cs                       |
| 508.0944                  | 0.19                         | 1                   | 508.0942      | 0.30           | B <sub>1α</sub>                |                   | +1Cs                       |
| 509.1020                  | 0.24                         | 1                   | 509.1021      | -0.15          | B <sub>1α</sub>                | H                 | +1Cs                       |
| 568.1403                  | 0.62                         | 1                   | 568.1404      | -0.05          | Z <sub>1α</sub>                |                   | +1Cs                       |
| 582.1309                  | 0.09                         | 1                   | 582.1310      | -0.16          | <sup>1,3</sup> A <sub>2α</sub> |                   | +1Cs                       |
| 582.1309                  | 0.09                         | 1                   | 582.1310      | -0.16          | <sup>2,4</sup> A <sub>2α</sub> |                   | +1Cs                       |
| 584.1353                  | 0.12                         | 1                   | 584.1353      | 0.10           | Y <sub>1α</sub>                | -2H               | +1Cs                       |
| 614.1457                  | 0.67                         | 1                   | 614.1458      | -0.20          | <sup>1,5</sup> X <sub>1α</sub> |                   | +1Cs                       |
| 624.1413                  | 0.03                         | 1                   | 624.1416      | -0.44          | <sup>1,4</sup> A <sub>2α</sub> | -2H               | +1Cs                       |
| 638.1576                  | 0.04                         | 1                   | 638.1572      | 0.57           | <sup>2,5</sup> A <sub>2α</sub> | -2H               | +1Cs                       |
| 640.1729                  | 0.06                         | 1                   | 640.1729      | 0.05           | <sup>2,5</sup> A <sub>2α</sub> |                   | +1Cs                       |
| 654.1522                  | 0.09                         | 1                   | 654.1521      | 0.14           | <sup>0,2</sup> A <sub>2α</sub> | -2H               | +1Cs                       |
| 656.1582                  | 0.03                         | 1                   | 656.1564      | 2.74           | <sup>2,5</sup> X <sub>1α</sub> | -2H               | +1Cs                       |
| 658.1721                  | 0.03                         | 1                   | 658.1721      | 0.09           | <sup>2,5</sup> X <sub>1α</sub> |                   | +1Cs                       |
| 682.1837                  | 0.17                         | 1                   | 682.1835      | 0.40           | <sup>1,5</sup> A <sub>2α</sub> | -2H               | +1Cs                       |
| 684.1989                  | 0.16                         | 1                   | 684.1991      | -0.27          | <sup>1,5</sup> A <sub>2α</sub> |                   | +1Cs                       |
| 714.1976                  | 0.03                         | 1                   | 714.1982      | -0.98          | <sup>1,3</sup> X <sub>1α</sub> | -2H               | +1Cs                       |
| 714.1976                  | 0.03                         | 1                   | 714.1982      | -0.98          | <sup>2,4</sup> X <sub>1α</sub> | -2H               | +1Cs                       |
| 728.1886                  | 2.44                         | 1                   | 728.1890      | -0.46          | C <sub>2α</sub>                | -2H               | +1Cs                       |
| 730.2058                  | 0.08                         | 1                   | 730.2046      | 1.67           | C <sub>2α</sub>                |                   | +1Cs                       |
| 742.2292                  | 1.84                         | 1                   | 742.2296      | -0.48          | Z <sub>2α</sub>                | -OCH <sub>2</sub> | +1Cs                       |
| 772.2403                  | 0.60                         | 1                   | 772.2401      | 0.24           | Z <sub>2α</sub>                |                   | +1Cs                       |
| 788.2348                  | 1.14                         | 1                   | 788.2350      | -0.27          | Y <sub>2α</sub>                | -2H               | +1Cs                       |
| 790.2512                  | 0.58                         | 1                   | 790.2507      | 0.70           | Y <sub>2α</sub>                |                   | +1Cs                       |
| 800.2462                  | 0.10                         | 1                   | 800.2465      | -0.31          | <sup>3,5</sup> A <sub>3</sub>  |                   | +1Cs                       |
| 827.4263                  | 0.04                         | 1                   | 827.4269      | -0.83          | Z <sub>1β</sub>                | H                 | 0                          |
| 860.2560                  | 0.21                         | 1                   | 860.2561      | -0.18          | <sup>1,3</sup> X <sub>0</sub>  | -2H               | +1Cs                       |
| 876.2507                  | 0.18                         | 1                   | 876.2511      | -0.49          | <sup>1,5</sup> X <sub>2α</sub> |                   | +1Cs                       |

**Supporting Information for EED of Glycans**

|           |      |   |           |       |                                |                                 |      |
|-----------|------|---|-----------|-------|--------------------------------|---------------------------------|------|
| 917.3135  | 0.17 | 1 | 917.3140  | -0.58 | $Z_{1\beta}/^{1,3}X_{2\alpha}$ | CH <sub>4</sub>                 | +1Cs |
| 959.3237  | 0.50 | 1 | 959.3246  | -0.89 | $Z_{1\beta}$                   |                                 | +1Cs |
| 975.3178  | 0.06 | 1 | 975.3195  | -1.72 | $Y_{1\beta}$                   | -2H                             | +1Cs |
| 977.3353  | 0.05 | 1 | 977.3351  | 0.19  | $Y_{1\beta}$                   |                                 | +1Cs |
| 1003.3503 | 0.15 | 1 | 1003.3508 | -0.49 | $^{0,4}X_{2\alpha}$            |                                 | +1Cs |
| 1005.3306 | 0.65 | 1 | 1005.3301 | 0.55  | $^{1,5}X_{1\beta}$             |                                 | +1Cs |
| 1033.3608 | 0.07 | 1 | 1033.3613 | -0.47 | $^{0,2}X_{1\beta}$             |                                 | +1Cs |
| 1033.3608 | 0.07 | 1 | 1033.3613 | -0.47 | $^{1,4}X_{1\beta}$             |                                 | +1Cs |
| 1089.3864 | 0.63 | 1 | 1089.3876 | -1.09 | $^{0,4}X_{1\alpha}$            | -2H                             | +1Cs |
| 1089.3864 | 0.63 | 1 | 1089.3876 | -1.09 | $^{0,4}X_0$                    | -2H                             | +1Cs |
| 1091.4026 | 3.13 | 1 | 1091.4032 | -0.56 | $^{0,4}X_{1\alpha}$            |                                 | +1Cs |
| 1091.4026 | 3.13 | 1 | 1091.4032 | -0.56 | $^{0,4}X_0$                    |                                 | +1Cs |
| 1105.3815 | 0.21 | 1 | 1105.3824 | -0.91 | $^{1,3}X_{2\alpha}$            | -2H                             | +1Cs |
| 1107.3975 | 0.81 | 1 | 1107.3982 | -0.61 | $^{1,3}X_{2\alpha}$            |                                 | +1Cs |
| 1119.3986 | 0.44 | 1 | 1119.3981 | 0.41  | $^{0,4}X_{1\beta}$             | -2H                             | +1Cs |
| 1121.4147 | 0.33 | 1 | 1121.4138 | 0.82  | $^{0,4}X_{1\beta}$             |                                 | +1Cs |
| 1133.4138 | 1.46 | 1 | 1133.4126 | 1.06  | $^{0,3}X_{1\beta}/C_3$         | NOC <sub>3</sub> H <sub>6</sub> | +1Cs |

**Supporting Information for EED of Glycans**

**Table S20.** List of EED fragment ions of the singly cesiated, permethylated, and <sup>18</sup>O-Labeled Sialyl Lewis A at *m/z* 1165.4400.

| Exp. <i>m/z</i><br>(Da/e) | Relative<br>Intensity<br>(%) | charge<br>state (z) | Theo.<br>Mass | Error<br>(ppm) | Fragment<br>Types                               | Loss or<br>Gain   | number of<br>metal adducts |
|---------------------------|------------------------------|---------------------|---------------|----------------|-------------------------------------------------|-------------------|----------------------------|
| 337.0047                  | 0.06                         | 1                   | 337.0047      | 0.05           | C <sub>1β</sub>                                 | -2H               | +1Cs                       |
| 362.0357                  | 0.06                         | 1                   | 362.0363      | -1.69          | <sup>3,5</sup> A <sub>1α</sub>                  | -2H               | +1Cs                       |
| 376.1962                  | 0.02                         | 1                   | 376.1966      | -1.09          | B <sub>1α</sub>                                 | H                 | 0                          |
| 406.0619                  | 0.02                         | 1                   | 406.0625      | -1.58          | <sup>2,5</sup> A <sub>1α</sub>                  | -2H               | +1Cs                       |
| 409.0615                  | 0.02                         | 1                   | 409.0622      | -1.72          | <sup>3,5</sup> A <sub>3</sub>                   |                   | +1Cs                       |
| 436.2422                  | 0.03                         | 1                   | 436.2427      | -1.22          | Z <sub>1α</sub>                                 | H                 | 0                          |
| 466.0832                  | 2.04                         | 1                   | 466.0837      | -1.01          | <sup>1,3</sup> X <sub>2α</sub> /B <sub>2α</sub> | CH <sub>4</sub>   | +1Cs                       |
| 508.0949                  | 0.44                         | 1                   | 508.0942      | 1.32           | B <sub>1α</sub>                                 |                   | +1Cs                       |
| 509.1018                  | 0.20                         | 1                   | 509.1021      | -0.51          | B <sub>1α</sub>                                 | H                 | +1Cs                       |
| 524.0894                  | 0.03                         | 1                   | 524.0891      | 0.52           | C <sub>1α</sub>                                 | -2H               | +1Cs                       |
| 526.1047                  | 0.07                         | 1                   | 526.1048      | -0.23          | C <sub>1α</sub>                                 |                   | +1Cs                       |
| 568.1401                  | 0.79                         | 1                   | 568.1404      | -0.48          | Z <sub>1α</sub>                                 |                   | +1Cs                       |
| 580.1159                  | 0.02                         | 1                   | 580.1154      | 0.95           | <sup>1,3</sup> A <sub>2α</sub>                  | -2H               | +1Cs                       |
| 580.1159                  | 0.02                         | 1                   | 580.1154      | 0.95           | <sup>2,4</sup> A <sub>2α</sub>                  | -2H               | +1Cs                       |
| 582.1309                  | 0.08                         | 1                   | 582.1310      | -0.16          | <sup>1,3</sup> A <sub>2α</sub>                  |                   | +1Cs                       |
| 582.1309                  | 0.08                         | 1                   | 582.1310      | -0.16          | <sup>2,4</sup> A <sub>2α</sub>                  |                   | +1Cs                       |
| 584.1356                  | 0.14                         | 1                   | 584.1353      | 0.63           | Y <sub>1α</sub>                                 | -2H               | +1Cs                       |
| 614.1458                  | 0.65                         | 1                   | 614.1458      | 0.00           | <sup>1,5</sup> X <sub>1α</sub>                  |                   | +1Cs                       |
| 624.1415                  | 0.03                         | 1                   | 624.1416      | -0.15          | <sup>1,4</sup> A <sub>2α</sub>                  | -2H               | +1Cs                       |
| 638.1578                  | 0.05                         | 1                   | 638.1572      | 0.86           | <sup>2,5</sup> A <sub>2α</sub>                  | -2H               | +1Cs                       |
| 640.1730                  | 0.05                         | 1                   | 640.1729      | 0.14           | <sup>2,5</sup> A <sub>2α</sub>                  |                   | +1Cs                       |
| 642.1767                  | 0.04                         | 1                   | 642.1771      | -0.67          | <sup>0,2</sup> X <sub>1α</sub>                  |                   | +1Cs                       |
| 654.1522                  | 0.18                         | 1                   | 654.1521      | 0.14           | <sup>0,2</sup> A <sub>2α</sub>                  | -2H               | +1Cs                       |
| 656.1679                  | 0.05                         | 1                   | 656.1678      | 0.19           | <sup>0,2</sup> A <sub>2α</sub>                  |                   | +1Cs                       |
| 670.1718                  | 0.04                         | 1                   | 670.1720      | -0.32          | <sup>1,4</sup> X <sub>1α</sub>                  | -2H               | +1Cs                       |
| 682.1839                  | 0.12                         | 1                   | 682.1835      | 0.67           | <sup>1,5</sup> A <sub>2α</sub>                  | -2H               | +1Cs                       |
| 684.1991                  | 0.07                         | 1                   | 684.1991      | 0.00           | <sup>1,5</sup> A <sub>2α</sub>                  |                   | +1Cs                       |
| 698.1784                  | 0.24                         | 1                   | 698.1784      | 0.03           | B <sub>2α</sub>                                 | -CH <sub>2</sub>  | +1Cs                       |
| 698.1784                  | 0.24                         | 1                   | 698.1783      | 0.04           | C <sub>2α</sub>                                 | -OCH <sub>4</sub> | +1Cs                       |
| 714.1733                  | 0.34                         | 1                   | 714.1733      | -0.02          | C <sub>2α</sub>                                 | -CH <sub>4</sub>  | +1Cs                       |
| 728.1889                  | 6.29                         | 1                   | 728.1890      | -0.04          | C <sub>2α</sub>                                 | -2H               | +1Cs                       |
| 730.2052                  | 0.33                         | 1                   | 730.2046      | 0.84           | C <sub>2α</sub>                                 |                   | +1Cs                       |

**Supporting Information for EED of Glycans**

|           |      |   |           |       |                                 |                   |      |
|-----------|------|---|-----------|-------|---------------------------------|-------------------|------|
| 742.2295  | 1.31 | 1 | 742.2296  | -0.07 | Z <sub>2α</sub>                 | -OCH <sub>2</sub> | +1Cs |
| 758.2247  | 0.28 | 1 | 758.2245  | 0.28  | Y <sub>2α</sub>                 | -OCH <sub>4</sub> | +1Cs |
| 758.2247  | 0.28 | 1 | 758.2245  | 0.27  | Z <sub>2α</sub>                 | -CH <sub>2</sub>  | +1Cs |
| 772.2479  | 0.08 | 1 | 772.2515  | -4.64 | Y <sub>2α</sub> /B <sub>3</sub> | CH <sub>4</sub>   | +1Cs |
| 788.2360  | 0.93 | 1 | 788.2350  | 1.28  | Y <sub>2α</sub>                 | -2H               | +1Cs |
| 790.2510  | 0.64 | 1 | 790.2507  | 0.39  | Y <sub>2α</sub>                 |                   | +1Cs |
| 827.2574  | 0.07 | 1 | 827.2573  | 0.07  | <sup>1,3</sup> A <sub>3</sub>   |                   | +1Cs |
| 827.4271  | 0.03 | 1 | 827.4269  | 0.21  | Z <sub>1β</sub>                 | H                 | 0    |
| 873.2873  | 0.03 | 1 | 873.2878  | -0.56 | <sup>0,3</sup> X <sub>0</sub>   |                   | +1Cs |
| 874.2709  | 0.53 | 1 | 874.2718  | -1.05 | <sup>0,2</sup> X <sub>2α</sub>  |                   | +1Cs |
| 876.2507  | 0.17 | 1 | 876.2511  | -0.49 | <sup>1,5</sup> X <sub>2α</sub>  |                   | +1Cs |
| 959.3244  | 0.66 | 1 | 959.3246  | -0.19 | Z <sub>1β</sub>                 |                   | +1Cs |
| 975.3205  | 0.04 | 1 | 975.3195  | 1.03  | Y <sub>1β</sub>                 | -2H               | +1Cs |
| 977.3354  | 0.04 | 1 | 977.3351  | 0.25  | Y <sub>1β</sub>                 |                   | +1Cs |
| 1003.3499 | 0.17 | 1 | 1003.3508 | -0.85 | <sup>0,4</sup> X <sub>2α</sub>  |                   | +1Cs |
| 1005.3301 | 0.76 | 1 | 1005.3301 | 0.00  | <sup>1,5</sup> X <sub>1β</sub>  |                   | +1Cs |
| 1031.3460 | 0.02 | 1 | 1031.3457 | 0.27  | <sup>0,2</sup> X <sub>1β</sub>  | -2H               | +1Cs |
| 1031.3460 | 0.02 | 1 | 1031.3457 | 0.27  | <sup>1,4</sup> X <sub>1β</sub>  | -2H               | +1Cs |
| 1033.3616 | 0.07 | 1 | 1033.3613 | 0.24  | <sup>0,2</sup> X <sub>1β</sub>  |                   | +1Cs |
| 1033.3616 | 0.07 | 1 | 1033.3613 | 0.24  | <sup>1,4</sup> X <sub>1β</sub>  |                   | +1Cs |
| 1045.3617 | 0.03 | 1 | 1045.3613 | 0.32  | <sup>0,3</sup> X <sub>1α</sub>  | -2H               | +1Cs |
| 1047.3765 | 0.03 | 1 | 1047.3770 | -0.52 | <sup>0,3</sup> X <sub>1α</sub>  |                   | +1Cs |
| 1049.3550 | 0.02 | 1 | 1049.3562 | -1.22 | <sup>2,5</sup> X <sub>1β</sub>  |                   | +1Cs |
| 1061.3580 | 0.26 | 1 | 1061.3563 | 1.64  | <sup>3,5</sup> X <sub>1α</sub>  | -2H               | +1Cs |
| 1077.3873 | 0.02 | 1 | 1077.3876 | -0.23 | <sup>0,3</sup> X <sub>1β</sub>  |                   | +1Cs |
| 1077.3873 | 0.02 | 1 | 1077.3876 | -0.23 | <sup>1,3</sup> X <sub>1β</sub>  |                   | +1Cs |
| 1077.3873 | 0.02 | 1 | 1077.3876 | -0.23 | <sup>2,4</sup> X <sub>1β</sub>  |                   | +1Cs |
| 1089.3878 | 0.49 | 1 | 1089.3876 | 0.25  | <sup>0,4</sup> X <sub>1α</sub>  | -2H               | +1Cs |
| 1089.3878 | 0.49 | 1 | 1089.3876 | 0.25  | <sup>0,4</sup> X <sub>0</sub>   | -2H               | +1Cs |
| 1091.4034 | 3.12 | 1 | 1091.4032 | 0.22  | <sup>0,4</sup> X <sub>1α</sub>  |                   | +1Cs |
| 1091.4034 | 3.12 | 1 | 1091.4032 | 0.22  | <sup>0,4</sup> X <sub>0</sub>   |                   | +1Cs |
| 1105.3827 | 0.18 | 1 | 1105.3824 | 0.19  | <sup>1,3</sup> X <sub>2α</sub>  | -2H               | +1Cs |
| 1107.3980 | 0.85 | 1 | 1107.3982 | -0.17 | <sup>1,3</sup> X <sub>2α</sub>  |                   | +1Cs |
| 1119.3994 | 0.40 | 1 | 1119.3981 | 1.17  | <sup>0,4</sup> X <sub>1β</sub>  | -2H               | +1Cs |
| 1121.4154 | 0.18 | 1 | 1121.4138 | 1.47  | <sup>0,4</sup> X <sub>1β</sub>  |                   | +1Cs |
| 1122.4200 | 0.04 | 1 | 1122.4216 | -1.37 | <sup>0,4</sup> X <sub>1β</sub>  | H                 | +1Cs |
